# Supplementary material for: Discovery of gargantulides B and C, new 52-membered macrolactones from Amycolatopsis sp. Complete absolute stereochemistry of the gargantulide family
Source: Royal Society of Chemistry journal article supplement (doi:10.1039/d1qo01480c), 2021-12-09
Supplement: d1qo01480c1.pdf [file d1qo01480c1.pdf]

## Supplementary Information

---

### **Discovery of gargantulides B and C, new 52-membered macrolactones from *Amycolatopsis* sp. Complete absolute stereochemistry of the gargantulide family**

Daniel Carretero-Molina,<sup>‡a</sup> Francisco Javier Ortiz-López,<sup>\*‡a</sup> Tetiana Gren,<sup>‡b</sup> Daniel Oves-Costales,<sup>a</sup> Jesús Martín,<sup>a</sup> Fernando Román-Hurtado,<sup>a</sup> Tue Sparholt Jørgensen,<sup>b</sup> Mercedes de la Cruz,<sup>a</sup> Caridad Díaz,<sup>a</sup> Francisca Vicente,<sup>a</sup> Kai Blin,<sup>b</sup> Fernando Reyes,<sup>a</sup> Tilmann Weber<sup>\*b</sup> and Olga Genilloud<sup>\*a</sup>

<sup>a</sup> Fundación MEDINA, Centro de Excelencia en Investigación de Medicamentos Innovadores en Andalucía, Avda. del Conocimiento 34, 18016 Armilla (Granada), Spain

<sup>b</sup>The Novo Nordisk Foundation Center for Biosustainability, Technical University of Denmark, Kemitorvet building 220, 2800 Kgs. Lyngby, Denmark

\*Correspondence should be addressed to F.J.O-L ([javier.ortiz@medinaandalucia.es](mailto:javier.ortiz@medinaandalucia.es)), T.W. ([tiwe@biosustain.dtu.dk](mailto:tiwe@biosustain.dtu.dk)) and O.G ([olga.genilloud@medinaandalucia.es](mailto:olga.genilloud@medinaandalucia.es))

## Table of Contents

|                                                                                                                                                                                                                       |           |
|-----------------------------------------------------------------------------------------------------------------------------------------------------------------------------------------------------------------------|-----------|
| <b>Experimental section</b> .....                                                                                                                                                                                     | <b>3</b>  |
| General experimental procedures .....                                                                                                                                                                                 | 3         |
| Strain isolation, identification and fermentation.....                                                                                                                                                                | 3         |
| Isolation of gargantulides B (1) and C (2) .....                                                                                                                                                                      | 3         |
| Characterization data of 1 and 2 .....                                                                                                                                                                                | 4         |
| Absolute configurations of the non-amino sugars present in 1 and 2.....                                                                                                                                               | 4         |
| Genome sequence alignments.....                                                                                                                                                                                       | 4         |
| Antimicrobial bioassays.....                                                                                                                                                                                          | 5         |
| <b>Supplementary data</b> .....                                                                                                                                                                                       | <b>6</b>  |
| <b>Figure S1.</b> Bioassay-guided isolation of gargantulides B (1) and C (2) .....                                                                                                                                    | 6         |
| <b>Figure S2.</b> UV (DAD) and ESI-TOF spectrum of gargantulide B (1) .....                                                                                                                                           | 7-9       |
| <b>Figure S3.</b> UV (DAD) and ESI-TOF spectrum of gargantulide C (2) .....                                                                                                                                           | 10-12     |
| <b>Table S1.</b> <sup>1</sup> H NMR and <sup>13</sup> C NMR (CD <sub>3</sub> OD) data of gargantulides B (1) and C (2) .....                                                                                          | 13-15     |
| <b>Figure S4.</b> 1D/2D NMR spectra of gargantulide B (1).....                                                                                                                                                        | 16-27     |
| <b>Figure S5.</b> 1D/2D NMR spectra of gargantulide C (1).....                                                                                                                                                        | 28-39     |
| <b>Figure S6.</b> Key COSY, TOCSY, HSQC-TOCSY and HMBC correlations observed for 2.....                                                                                                                               | 40        |
| <b>Figure S7.</b> LC-HRMS co-detection of gargantulides A (3), B (1) and C (2) .....                                                                                                                                  | 41        |
| <b>Table S2.</b> antiSMAHS results .....                                                                                                                                                                              | 42        |
| <b>Table S3.</b> Putative functions of genes in <i>gar</i> BGC.....                                                                                                                                                   | 44        |
| <b>Table S4.</b> Prediction of activity and stereochemistry of AT, KR, ER and DH domains from<br>bioinformatics analysis. Stereochemical outcomes for gargantulides B and C.....                                      | 47        |
| <b>Figure S8.</b> Extracted amino acid sequence alignments of AT, KR, DH and ER domains.....                                                                                                                          | 48        |
| <b>Supplementary note:</b> Biosynthesis of amino sugar maG .....                                                                                                                                                      | 49        |
| <b>Table S5.</b> Levels of identity and similarity of the putative <i>N</i> -Methyltransferase HUW46_03188<br>from CA-230715 to other known <i>N</i> -Methyltransferases .....                                        | 50        |
| <b>Table S6.</b> Identified genes encoding for putative glucose-1-phosphate thymidyltransferase and<br>dTDP-glucose 4,6-dehydratase in the genome of CA-230715 .....                                                  | 50        |
| <b>Figure S9.</b> Proposed biosynthetic pathway for the unusual amino sugar 3,6-deoxy-3-<br>methylamino glucose (maG) .....                                                                                           | 50        |
| <b>Figure S10.</b> Bioinformatics assignments of the absolute configurations for the gargantulides<br>polyketide aglycon. Comparison with the absolute configurations previously reported for<br>gargantulide A ..... | 51        |
| <b>Figure S11.</b> Determination of the relative configuration of the C-55 to C-57 stereocluster for<br>gargantulide B (1) .....                                                                                      | 52        |
| <b>Figure S12.</b> Determination of the relative configuration of the C-6–C-7 stereocluster for<br>gargantulide B (1).....                                                                                            | 55        |
| <b>Figure S13.</b> Determination of the relative configuration of the C-10–C-12 stereocluster for<br>gargantulide B (1) .....                                                                                         | 56        |
| <b>Figure S14.</b> Determination of the relative configuration of the C-17(R)–C-18(R) stereocluster for<br>gargantulide (1) .....                                                                                     | 58        |
| <b>Figure S15.</b> Determination of the absolute configuration of the non-amino sugars present in<br>gargantulides B (1) and C (2) .....                                                                              | 59        |
| <b>Table S9.</b> Antibacterial and antifungal activities of 1 and 2.....                                                                                                                                              | 61        |
| <b>Supplementary references</b> .....                                                                                                                                                                                 | <b>62</b> |

## Experimental section

**General experimental procedures:** Optical rotations were measured on a Jasco P-2000 polarimeter. IR spectra were recorded with a JASCO FT/IR-4100 spectrometer equipped with a PIKE MIRacle single reflection ATR accessory. NMR spectra were recorded on a Bruker Avance III spectrometer (500 and 125 MHz for  $^1\text{H}$  and  $^{13}\text{C}$  NMR, respectively) equipped with a 1.7 mm TCI MicroCryoProbe. Chemical shifts were reported in ppm using the signals of the residual solvents as internal reference ( $\delta_{\text{H}}$  3.31 and  $\delta_{\text{C}}$  49.1 for  $\text{CD}_3\text{OD}$ ). LC-UV-LRMS analysis were performed on an Agilent 1100 single quadrupole LC-MS system as previously described.<sup>1</sup> ESI-TOF and MS/MS spectra were acquired using a Bruker maXis QTOF mass spectrometer coupled to an Agilent Rapid Resolution 1200 LC. The mass spectrometer was operated in positive ESI mode. The instrumental parameters were 4 kV capillary voltage, drying gas flow of 11 L  $\text{min}^{-1}$  at 200 °C, and nebulizer pressure of 2.8 bar. TFA-Na cluster ions were used for mass calibration of the instrument prior to sample injection. Pre-run calibration was done by infusion with the same TFA-Na calibrant. Semi-preparative HPLC separation was performed on a Gilson GX-281 322H2 with a semi-preparative reversed-phase column (Waters XBridge Phenyl, 10 x 150 mm, 5  $\mu\text{m}$ ). Acetone used for extraction was analytical grade. Solvents employed for isolation were all HPLC grade. Chemical reagents and standards were purchased from Sigma-Aldrich.

**Strain isolation, identification and fermentation:** The strain CA-230715 was isolated from a soil sample collected at a waterlogged forest in Central African Republic. Initial similarity-based search with the 16S rDNA sequence (1318nt) against the EzBioCloud database indicated that the strain is closely related to *Amycolatopsis minnesotensis* 32U-2(T) (98.71% identity, 91.6% completeness).

A 250 mL fermentation of the producing microorganism was obtained as follows: a seed culture of the strain was obtained by inoculating one 150 x 25 mm tube containing 14 mL of seed-medium (soluble starch 20 g/L, glucose 10 g/L, NZ Amine Type E 5 g/L, meat extract 3 g/L, peptone 5 g/L, yeast extract 5 g/L, calcium carbonate 1 g/L, pH 7) with 0.7 mL of freshly thawed inoculum stock of CA-230715. The tube was incubated at 28 °C, 70% relative humidity and 220 rpm for 5 days. The fresh inoculum thus generated was employed to inoculate two 250 mL conical flasks each containing 125 mL of APM9 medium (glucose 50 g/L, soluble starch 12 g/L, soy flour 30 g/L,  $\text{CoCl}_2 \cdot 6\text{H}_2\text{O}$  2 mg/L, calcium carbonate 7 g/L, pH 7). The flasks were incubated at 28 °C, 70% relative humidity and 220 rpm during 13 days before harvesting.

**Isolation of gargantulides B (1) and C (2):** The 250 mL culture broth was extracted with an equal volume of acetone under continuous shaking at 220 rpm for 1h. The mycelial debris was discarded by centrifugation at 9000 rpm and the filtered supernatant/acetone mixture (ca. 0.5 L) was concentrated to 0.25 L under a nitrogen stream. The aqueous crude extract was loaded onto a Sepabeads® SP207ss resin column and eluted using acetone/methanol (1:1). The resulting organic extract was chromatographed by semipreparative reverse-phase HPLC (Waters XBridge Phenyl, 10 x 150 mm, 5  $\mu\text{m}$ ; 3.6 mL/min, UV detection at 210 and 280 nm) with a linear gradient of  $\text{CH}_3\text{CN}/\text{H}_2\text{O}/0.1\%$  trifluoroacetic acid (TFA), from 15 to 28%  $\text{CH}_3\text{CN}$  (0.1% TFA) over 15 min followed by an isocratic step of 28%  $\text{CH}_3\text{CN}$  (0.1% TFA) over 19 min, to yield gargantulides B (**1**, 2.1 mg, rt 22 min) and C (**2**, 1.7 mg, rt 24.5min) as white amorphous powders.

### Characterization data:

*Gargantulide B (1)*:  $[\alpha]_D^{25}$  -28.3 (c 0.33, MeOH); IR (ATR)  $\text{cm}^{-1}$ : 3343, 2934, 1674, 1456, 1428, 1379, 1201, 1134, 1068, 1023; (+)-ESI-TOFMS  $m/z$  2392.4804  $[\text{M}+\text{H}]^+$  (calcd. for  $\text{C}_{116}\text{H}_{219}\text{N}_2\text{O}_{47}^+$ , 2392.4808), 1197.2455  $[\text{M}+2\text{H}]^{2+}$  (calcd. for  $\text{C}_{116}\text{H}_{220}\text{N}_2\text{O}_{47}^{2+}$ , 1197.2455), 798.4995  $[\text{M}+3\text{H}]^{3+}$  (calcd. for  $\text{C}_{116}\text{H}_{221}\text{N}_2\text{O}_{47}^{3+}$ , 798.4994);  $^1\text{H}$  and  $^{13}\text{C}$  NMR data see Table S1.

*Gargantulide C (2)*:  $[\alpha]_D^{25}$  -20.5 (c 0.33, MeOH); IR (ATR)  $\text{cm}^{-1}$ : 3342, 2935, 1674, 1456, 1425, 1379, 1201, 1135, 1067, 1024; (+)-ESI-TOFMS  $m/z$  2230.4286  $[\text{M}+\text{H}]^+$  (calcd. for  $\text{C}_{110}\text{H}_{209}\text{N}_2\text{O}_{42}^+$ , 2230.4280), 1116.2170  $[\text{M}+2\text{H}]^{2+}$  (calcd. for  $\text{C}_{110}\text{H}_{210}\text{N}_2\text{O}_{42}^{2+}$ , 1116.2191), 744.4808  $[\text{M}+3\text{H}]^{3+}$  (calcd. for  $\text{C}_{110}\text{H}_{211}\text{N}_2\text{O}_{42}^{3+}$ , 744.4818);  $^1\text{H}$  and  $^{13}\text{C}$  NMR data see Table S1.

### Determination of the absolute configurations of the non-amino sugars present in gargantulides

**B and C:** Compounds **1** and **2** (400  $\mu\text{g}$  each) were separately dissolved in 0.1 mL of 1 N HCl and heated at 85 °C for 3.5 h in a sealed vial. The crude hydrolysates were evaporated to dryness under a nitrogen stream and each residue was dissolved in 100  $\mu\text{L}$  of pyridine containing 0.5 mg of L-cysteine methyl ester hydrochloride and heated at 60 °C for 1 h. A 100  $\mu\text{L}$  solution of *o*-tolyl isothiocyanate (0.5 mg) in pyridine was added to the mixture, which was heated at 60 °C for 1 h. Standard monosaccharides (D-glucose, D-mannose and D-arabinose) were treated in the same manner with both L- and D- forms of cysteine methyl ester hydrochloride separately. The reaction mixtures (20  $\mu\text{L}$ ) were diluted with 50  $\mu\text{L}$  of methanol and analyzed by ESI LC/MS on an Agilent 1100 single Quadrupole LC/MS. Separations were carried out on a Waters XBridge C18 column (4.6  $\times$  150 mm, 5 $\mu\text{m}$ ), maintained at 40 °C. A mixture of two solvents, A (10%  $\text{CH}_3\text{CN}$ , 90%  $\text{H}_2\text{O}$ ) and B (90%  $\text{CH}_3\text{CN}$ , 10%  $\text{H}_2\text{O}$ ), both containing 1.3 mM trifluoroacetic acid and 1.3 mM ammonium formate, was used as the mobile phase under a linear gradient elution mode (isocratic 15% B for 25 min, 15-100% B in 0.1 min and then isocratic 100% B for 5 min) at a flow rate of 1.0 mL/min. Retention times (min) for the derivatized standard monosaccharides (with both L- and D- forms of cysteine methyl ester hydrochloride) present in **1** and **2** were: D-glucose + L-Cys/*o*-TolylNCS: 17.05, D-glucose + D-Cys/*o*-TolylNCS: 15.70, D-mannose + L-Cys/*o*-TolylNCS: 10.14, D-mannose + D-Cys/*o*-TolylNCS: 17.22, D-arabinose + L-Cys/*o*-TolylNCS: 20.41, D-arabinose + D-Cys/*o*-TolylNCS: 18.99. Retention times (min) for the observed peaks in the HPLC trace of the L-Cys/*o*-TolylNCS derivatized hydrolysis product of **1** were: D-glucose + L-Cys/*o*-TolylNCS: 17.11, D-mannose + L-Cys/*o*-TolylNCS: 10.10, D-arabinose + L-Cys/*o*-TolylNCS: 20.48. Retention times (min) for the observed peaks in the HPLC trace of the L-Cys/*o*-TolylNCS derivatized hydrolysis product of **2** were: D-glucose + L-Cys/*o*-TolylNCS: 17.10, D-mannose + L-Cys/*o*-TolylNCS: 10.10, D-arabinose + L-Cys/*o*-TolylNCS: 20.56.

**Genome sequence alignments:** The sequences of AT, KR, DH and ER domains were manually extracted from the genome sequence of CA-230715 and analyzed using Geneious 9.1.8 software platform.<sup>2</sup> The catalytic regions and regions valuable for the prediction of stereochemistry were identified as described in previous works.<sup>3-6</sup> Multiple sequence alignments were run using MUSCLE Alignment function<sup>7</sup> of Geneious, set to 8 maximum iterations. As a comparison, domains manually extracted from the erythromycin cluster of *S. erythraea* NRRL2338 were used.

**Antimicrobial bioassays:** Compounds **1** and **2** were tested in antimicrobial assays against the growth of the gram-negative bacteria *E. coli* ATCC 25922, *A. baumannii* MB5973, *K. pneumoniae* ATCC 700603 and *P. aeruginosa* MB5919 and against the gram-positive bacteria methicillin-resistant *S. aureus* (MRSA) MB5393, methicillin-susceptible *S. aureus* (MSSA) and Van-A vancomycin-resistant *Enterococcus* (VRE) following previously described methodologies.<sup>8-10</sup>

Compounds **1** and **2** were also evaluated for their antifungal activity and spectrum against the filamentous fungus *Aspergillus fumigatus* ATCC46645 following previously described methodologies<sup>8</sup> and the yeast *Candida albicans* ATCC64124 as follows: a thawed stock inoculum suspension from cryovials was streaked onto Sabouraud dextrose agar (SDA) plates and incubated at 37 °C overnight to obtain isolated colonies. The single colonies were inoculated into 20 mL of RPMI 1640 medium (Sigma) in 250 mL Erlenmeyer flasks and were adjusted at 0.25-0.28 ODU (612 nm) and then diluted 1:10 in order to obtain the inoculum for assay. The variation of the growth was quantified by measuring absorbance (OD<sub>612nm</sub>) using the plate reader EnVision® Multilabel (Perkin Elmer) with two readings, one at initial time and other after that the plate was incubated at 37 °C for 20 hours.

Each compound was serially diluted in DMSO with a dilution factor of 2 to provide 10 concentrations starting at 128 µg/mL for all the assays. The MIC was defined as the lowest concentration of compound that inhibited ≥ 95% of the growth of a microorganism after overnight incubation. The Genedata Screener software (Genedata, Inc., Basel, Switzerland) was used to process and analyze the data and also to calculate the RZ' factor, which predicts the robustness of an assay.<sup>11</sup> In all experiments performed in this work the RZ' factor obtained was between 0.76 and 0.93

## Supplementary data

**Figure S1.** Bioassay-guided isolation of gargantulides B (**1**) and C (**2**). Semipreparative HPLC-UV chromatogram (blue trace: 210 nm; (orange trace: 280 nm)

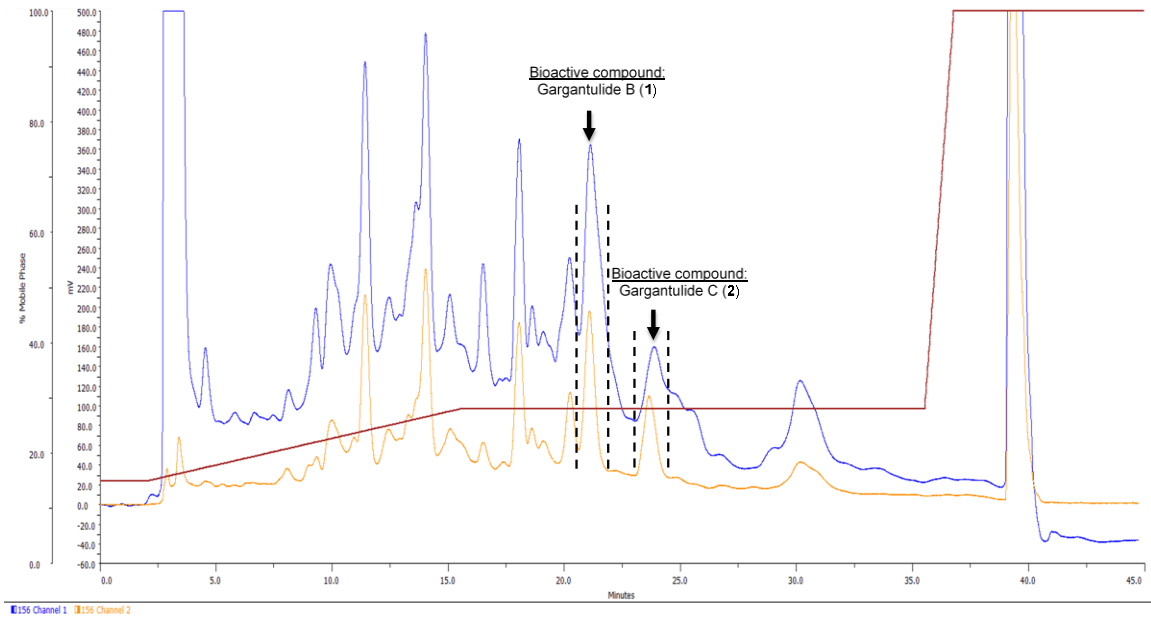

**Figure S2.** UV (DAD) and ESI(+)-TOF spectrum of gargantulide B (**1**)

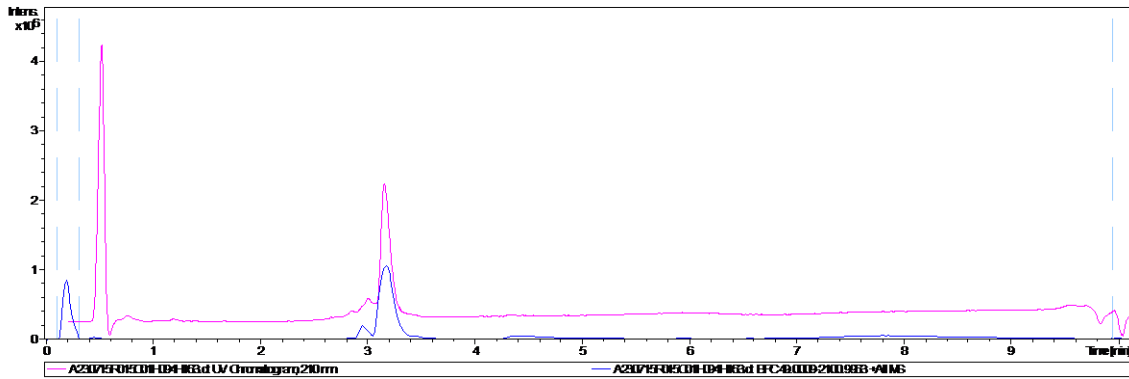

a) LC-UV-HRMS chromatogram (UV 210 nm: pink trace; MS+: blue trace) for **1**

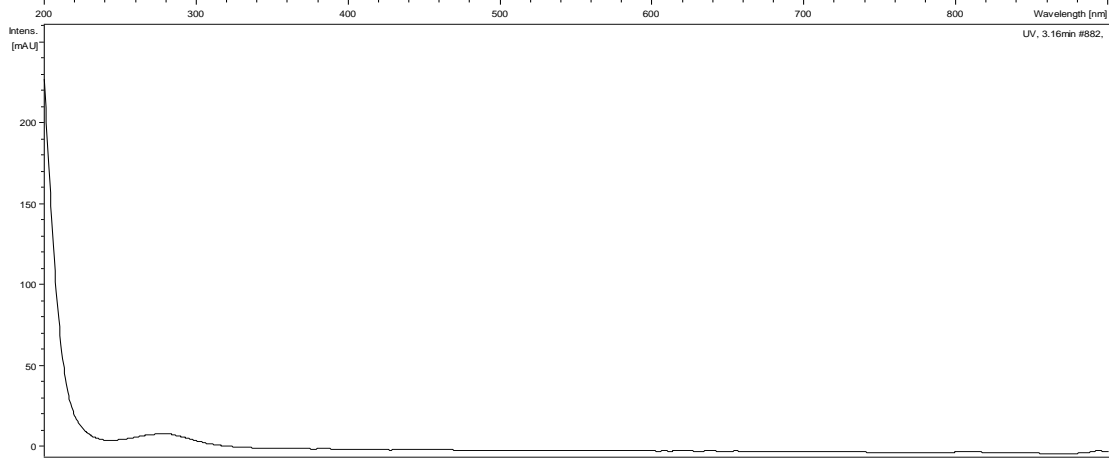

b) UV spectrum of **1**

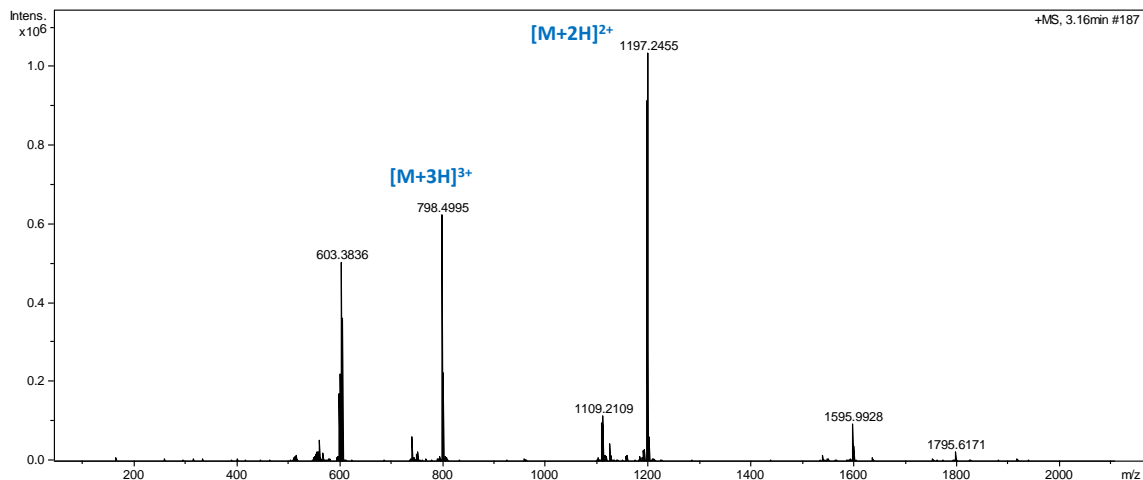

c) HRESIMS(+)-TOF spectra (ISCID 0 eV) of **1** (overview)

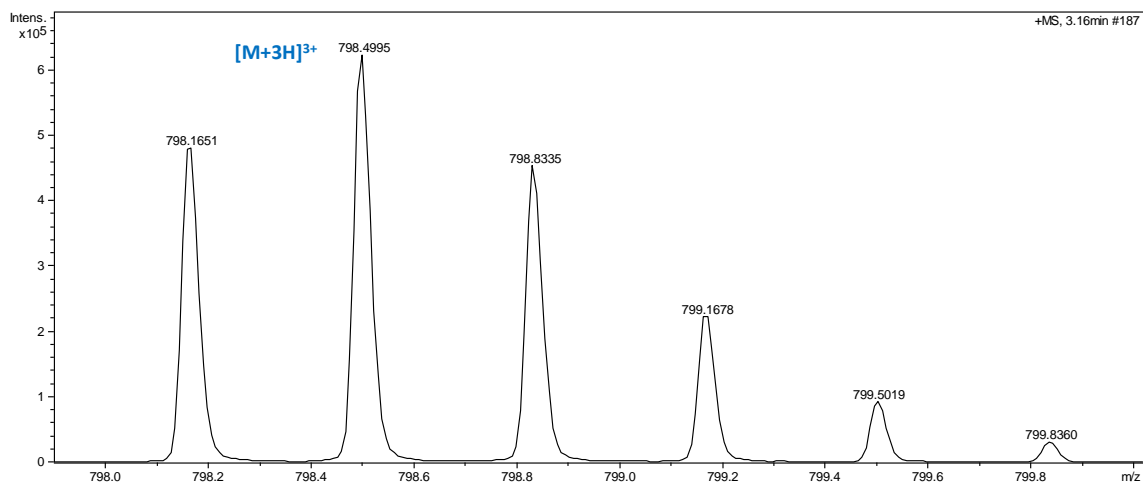

d) HRESIMS(+)-TOF spectra (ISCID 0 eV) of **1**. Triply-charged adducts (zoom in region)

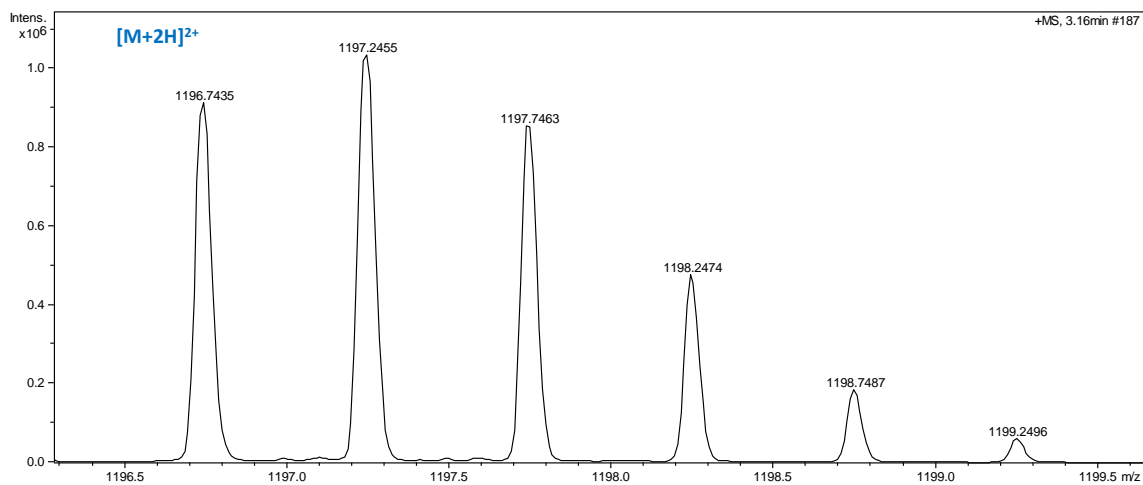

e) HRESIMS(+)-TOF spectra (ISCID 0 eV) of **1**. Doubly-charged adducts (zoom in region)



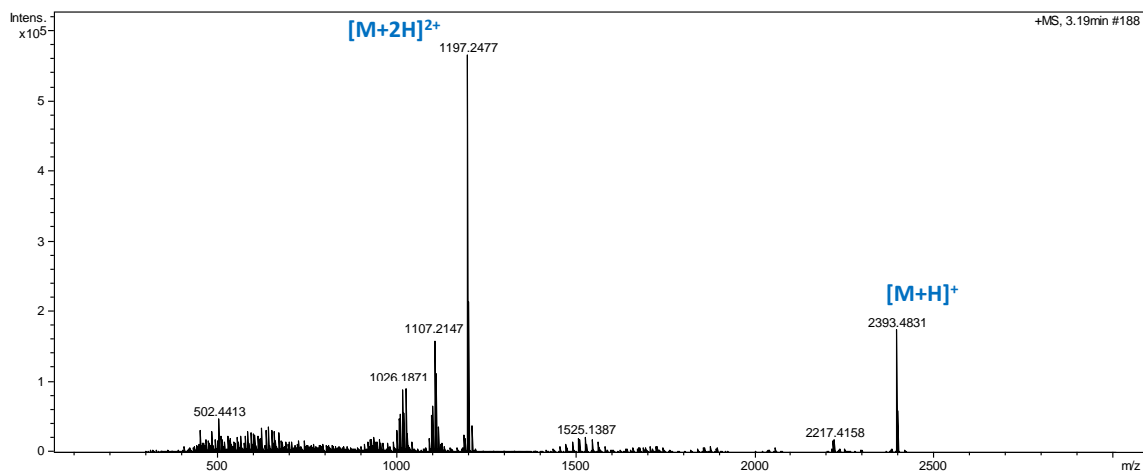

f) . HRESIMS(+)-TOF spectra (ISCID 75 eV) of **1** (overview)

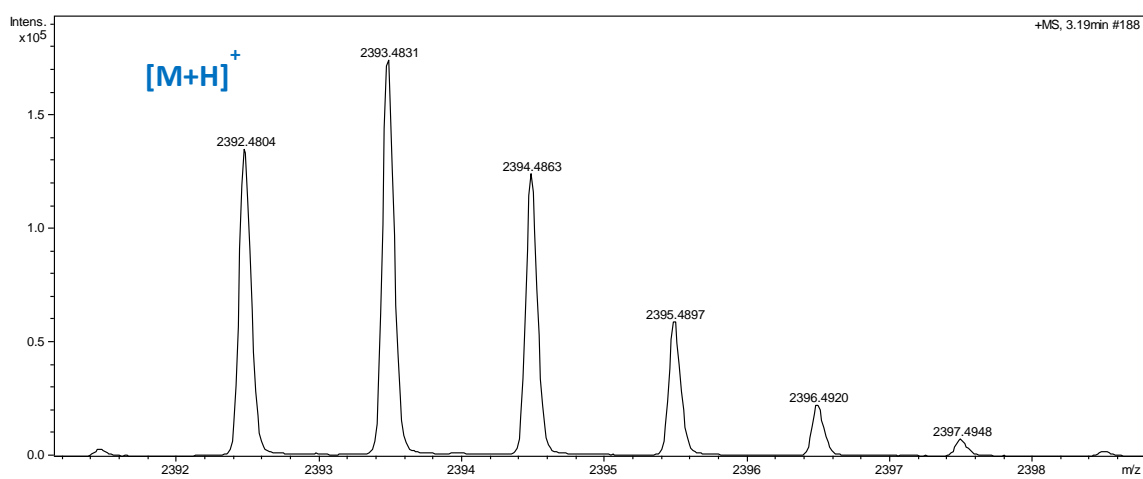

g) HRESIMS(+)-TOF spectra (ISCID 75 eV) of **1**. [M+H]<sup>+</sup> adduct (zoom in region)

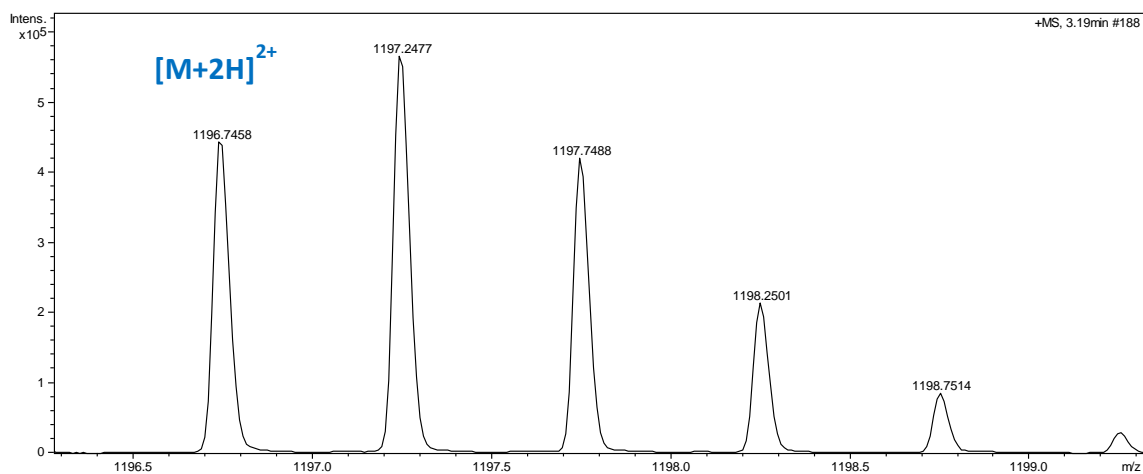

h) HRESIMS(+)-TOF spectra (ISCID 75 eV) of **1**. [M+2H]<sup>2+</sup> adduct (zoom in region)

**Figure S3.** UV (DAD) and ESI(+)-TOF spectrum of gargantulide C (**2**)

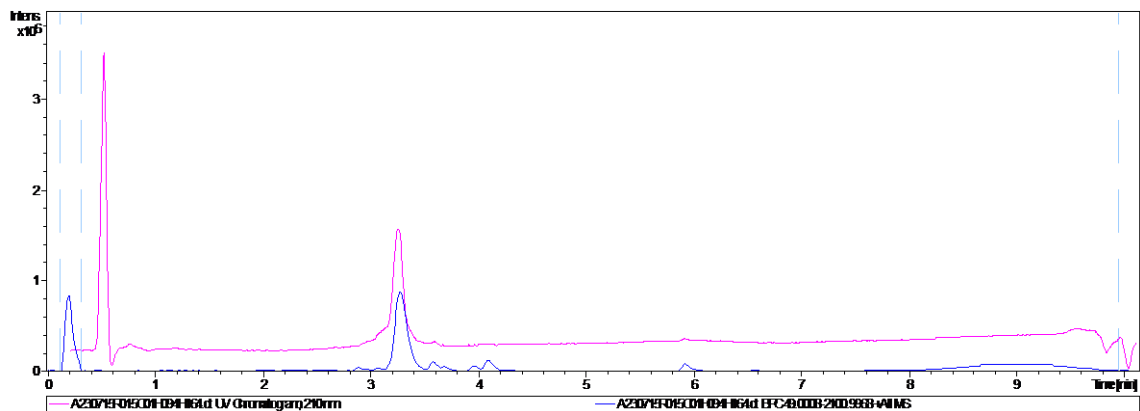

a) LC-UV-HRMS chromatogram (UV 210 nm: pink trace; MS+: blue trace) for **2**

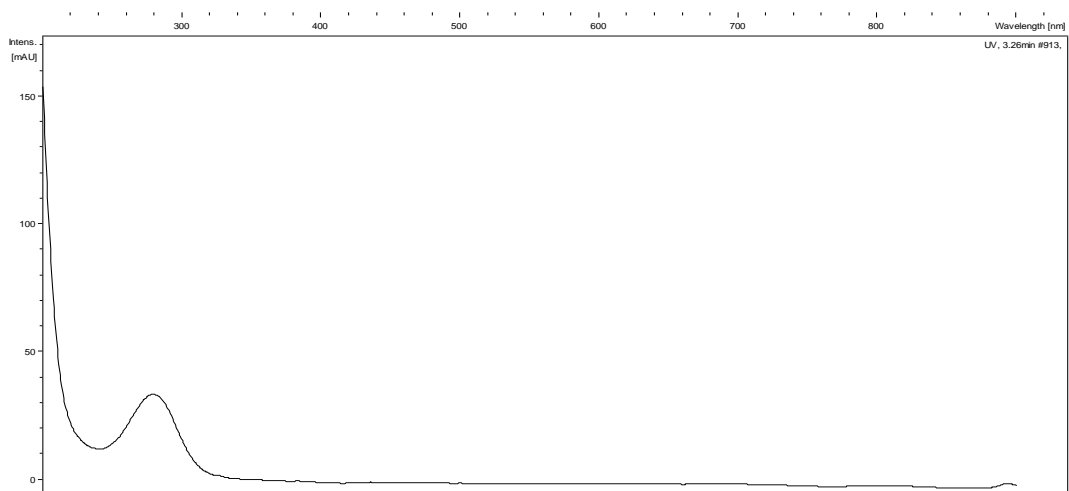

b) UV spectrum of **2**

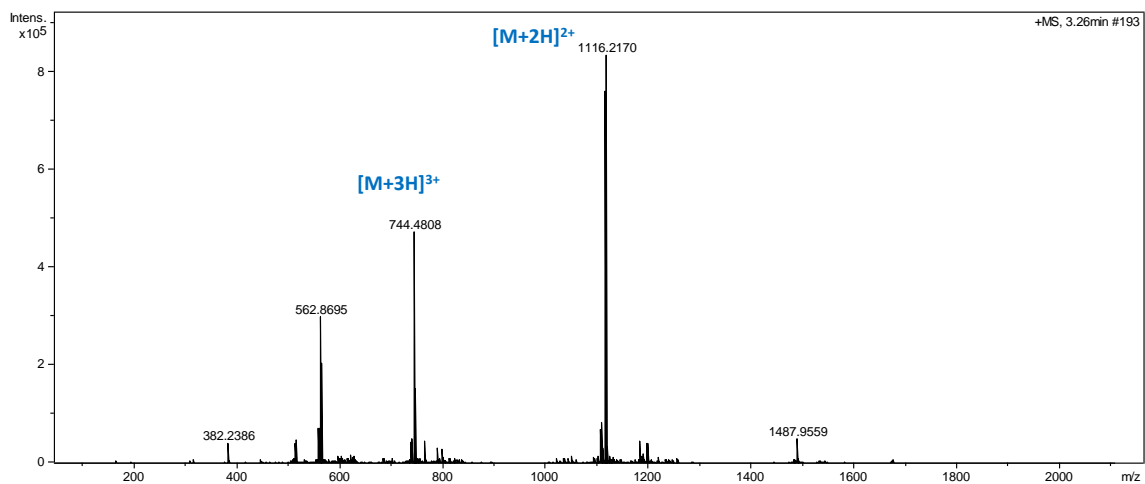

c) HRESIMS(+)-TOF spectra (ISCID 0 eV) of **2** (overview)

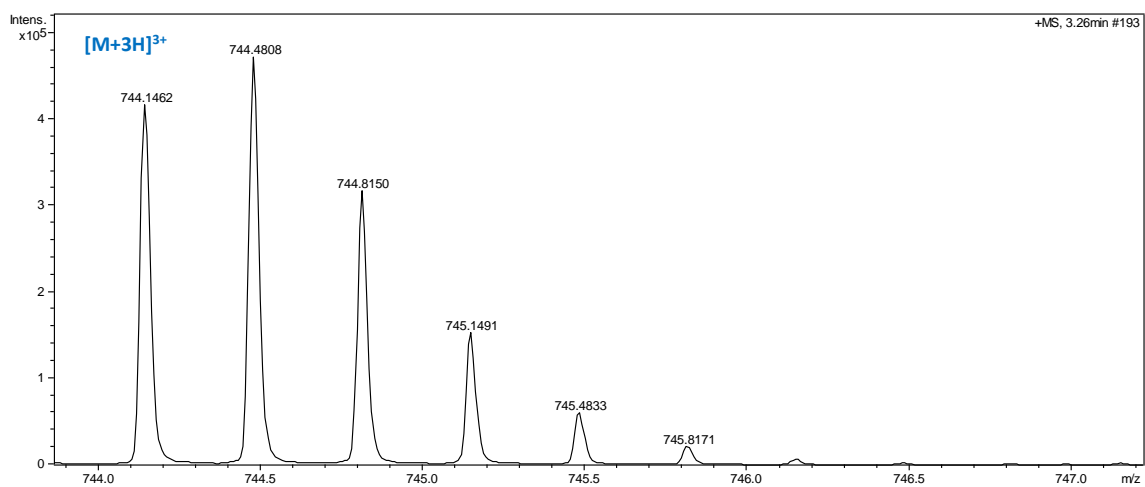

d) HRESIMS(+)-TOF spectra (ISCID 0 eV) of **1**. Triply-charged adducts (zoom in region)

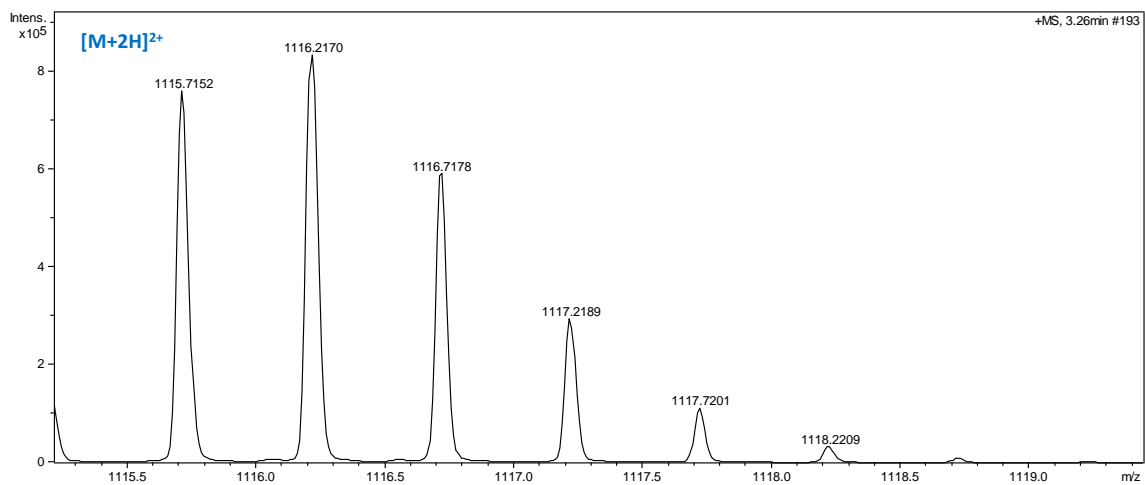

e) HRESIMS(+)-TOF spectra (ISCID 0 eV) of **1**. Doubly-charged adducts (zoom in region)

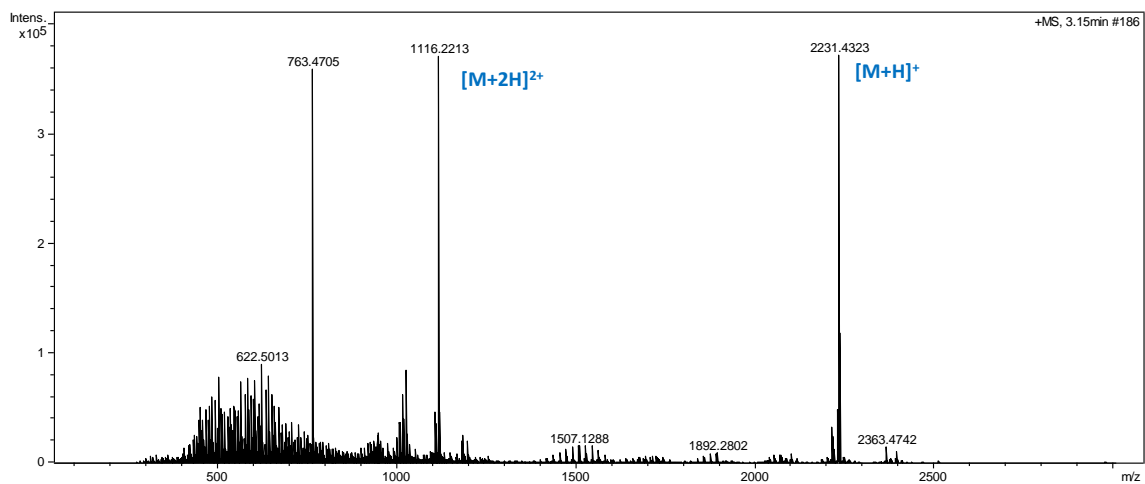

f) HRESIMS(+)-TOF spectra (ISCID 75 eV) of **2** (overview)

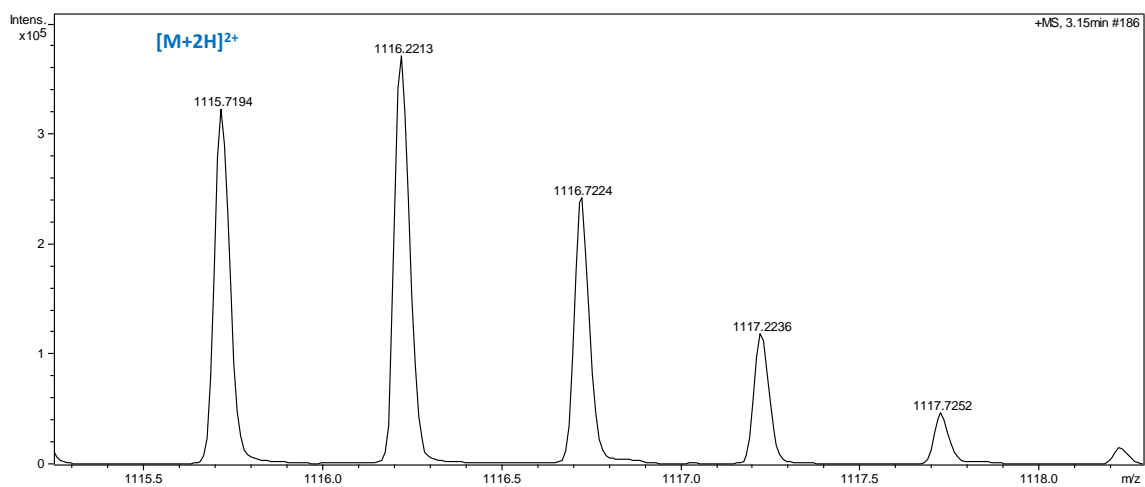

g) HRESIMS(+)-TOF spectra (ISCID 75 eV) of **2**. [M+H]<sup>+</sup> adduct (zoom in region)

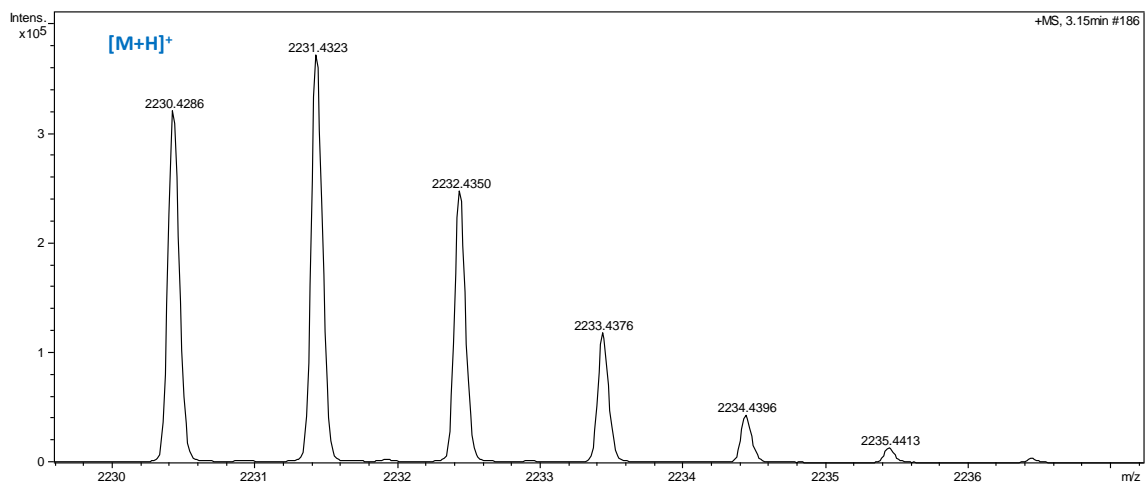

h) HRESIMS(+)-TOF spectra (ISCID 75 eV) of **2**. [M+2H]<sup>2+</sup> adduct (zoom in region)

**Table S1.** NMR spectroscopic data (CD<sub>3</sub>OD) of **1** and **2**.

| Gargantulide B ( <b>1</b> ) |                                     |                                                | Gargantulide C ( <b>2</b> ) |                                     |                                                |
|-----------------------------|-------------------------------------|------------------------------------------------|-----------------------------|-------------------------------------|------------------------------------------------|
| n <sup>o</sup>              | δ <sup>13</sup> C                   | δ <sup>1</sup> H (mult, J, Hz)                 | n <sup>o</sup>              | δ <sup>13</sup> C                   | δ <sup>1</sup> H (mult, J, Hz)                 |
| 1                           | 175.3, C                            |                                                | 1                           | 175.3, C                            |                                                |
| 2                           | 35.5, CH <sub>2</sub>               | 2.36, m                                        | 2                           | 35.6, CH <sub>2</sub>               | 2.36, m                                        |
| 3                           | 26.9, CH <sub>2</sub>               | 1.61 <sup>a</sup> , m                          | 3                           | 26.9, CH <sub>2</sub>               | 1.62 <sup>a</sup> , m                          |
| 4                           | 28.5 <sup>a</sup> , CH <sub>2</sub> | 1.32 <sup>a</sup> , m<br>1.43 <sup>a</sup> , m | 4                           | 28.5 <sup>a</sup> , CH <sub>2</sub> | 1.33 <sup>a</sup> , m<br>1.43 <sup>a</sup> , m |
| 5                           | 34.4 <sup>b</sup> , CH <sub>2</sub> | 1.19, m<br>1.50 <sup>a</sup> , m               | 5                           | 34.4 <sup>a</sup> , CH <sub>2</sub> | 1.19, m<br>1.50 <sup>a</sup> , m               |
| 6                           | 39.9, CH                            | 1.48 <sup>a</sup> , m                          | 6                           | 39.9, CH                            | 1.48 <sup>a</sup> , m                          |
| Me-6                        | 14.6, CH <sub>3</sub>               | 0.88 <sup>a</sup> , d (6.7)                    | Me-6                        | 14.6, CH <sub>3</sub>               | 0.89 <sup>a</sup> , d (6.7)                    |
| 7                           | 76.2, CH                            | 3.42, m                                        | 7                           | 76.2, CH                            | 3.42, m                                        |
| 8                           | 32.9, CH <sub>2</sub>               | 1.46 <sup>a</sup> , m                          | 8                           | 32.9, CH <sub>2</sub>               | 1.47 <sup>a</sup> , m                          |
| 9                           | 32.5, CH <sub>2</sub>               | 1.38 <sup>a</sup> , m<br>1.46 <sup>a</sup> , m | 9                           | 32.5, CH <sub>2</sub>               | 1.38 <sup>a</sup> , m<br>1.47 <sup>a</sup> , m |
| 10                          | 36.2, CH                            | 1.65 <sup>a</sup> , m                          | 10                          | 36.2, CH                            | 1.65 <sup>a</sup> , m                          |
| Me-10                       | 13.4, CH <sub>3</sub>               | 0.86 <sup>a</sup> , d (6.7)                    | Me-10                       | 13.3, CH <sub>3</sub>               | 0.86 <sup>a</sup> , d (6.7)                    |
| 11                          | 79.9, CH                            | 3.12, dd (8.2, 3.2)                            | 11                          | 79.9, CH                            | 3.12, dd (8.3, 3.2)                            |
| 12                          | 37.6, CH                            | 1.55 <sup>a</sup> , m                          | 12                          | 37.6, CH                            | 1.55, m                                        |
| Me-12                       | 16.8, CH <sub>3</sub>               | 0.86 <sup>a</sup> , d (6.7)                    | Me-12                       | 16.8, CH <sub>3</sub>               | 0.86 <sup>a</sup> , d (6.8)                    |
| 13                          | 34.0, CH <sub>2</sub>               | 1.10 <sup>a</sup> , m<br>1.75, m               | 13                          | 34.1, CH <sub>2</sub>               | 1.10 <sup>a</sup> , m<br>1.75, m               |
| 14                          | 28.5 <sup>a</sup> , CH <sub>2</sub> | 1.48 <sup>a</sup> , m<br>1.22, m               | 14                          | 28.5 <sup>a</sup> , CH <sub>2</sub> | 1.48 <sup>a</sup> , m<br>1.22, m               |
| 15                          | 27.2, CH <sub>2</sub>               | 1.33 <sup>a</sup> , m<br>1.57 <sup>a</sup> , m | 15                          | 27.1, CH <sub>2</sub>               | 1.32 <sup>a</sup> , m<br>1.57 <sup>a</sup> , m |
| 16                          | 35.6, CH <sub>2</sub>               | 1.35 <sup>a</sup> , m<br>1.57 <sup>a</sup> , m | 16                          | 35.9, CH <sub>2</sub>               | 1.35 <sup>a</sup> , m<br>1.57 <sup>a</sup> , m |
| 17                          | 74.8, CH                            | 3.67 <sup>a</sup> , m                          | 17                          | 74.8, CH                            | 3.60 <sup>a</sup> , m                          |
| 18                          | 54.1, CH                            | 2.69, dq (8.6, 6.9)                            | 18                          | 53.9, CH                            | 2.68, dq (8.6, 7.0)                            |
| Me-18                       | 13.5, CH <sub>3</sub>               | 1.00, d (6.9)                                  | Me-18                       | 13.7, CH <sub>3</sub>               | 0.99, d (6.8)                                  |
| 19                          | 214.6, C                            |                                                | 19                          | 214.6, C                            |                                                |
| 20                          | 49.9, CH <sub>2</sub>               | 2.72, dd (17.2, 5.1)<br>2.89, dd (17.2, 7.8)   | 20                          | 49.9, CH <sub>2</sub>               | 2.80, dd (17.6, 6.9)<br>2.87, dd (17.6, 6.8)   |
| 21                          | 74.1, CH                            | 4.49, dd (7.8, 5.1)                            | 21                          | 74.1, CH                            | 4.47, dd (6.9, 6.8)                            |
| 22                          | 146.8, C                            |                                                | 22                          | 146.7, C                            |                                                |
| Me-22                       | 12.6, CH <sub>3</sub>               | 1.81 <sup>a</sup> , s                          | Me-22                       | 11.9, CH <sub>3</sub>               | 1.78 <sup>a</sup> , s                          |
| 23                          | 123.2, CH                           | 5.21, d (10.3)                                 | 23                          | 123.5, CH                           | 5.22, d (10.3)                                 |
| 24                          | 76.1, CH                            | 4.76, dd (10.3, 8.1)                           | 24                          | 75.8, CH                            | 4.81, dd (10.3, 8.0)                           |
| 25                          | 80.6, CH                            | 3.56, dd (8.1, 3.5)                            | 25                          | 80.4, CH                            | 3.64, dd (8.0, 2.8)                            |
| 26                          | 39.3, CH                            | 1.69 <sup>a</sup> , m                          | 26                          | 39.4, CH                            | 1.74 <sup>a</sup> , m                          |
| Me-26                       | 11.9, CH <sub>3</sub>               | 1.06, d (7.0)                                  | Me-26                       | 11.8, CH <sub>3</sub>               | 1.06, d (7.2)                                  |
| 27                          | 68.6, CH                            | 4.22 <sup>a</sup> , m                          | 27                          | 68.8 <sup>a</sup> , CH              | 4.20 <sup>a</sup> , m                          |
| 28                          | 43.9, CH <sub>2</sub>               | 1.27, m<br>1.59 <sup>a</sup> , m               | 28                          | 43.9, CH <sub>2</sub>               | 1.27, m<br>1.59 <sup>a</sup> , m               |
| 29                          | 68.6 <sup>a</sup> , CH              | 3.64 <sup>a</sup> , m                          | 29                          | 68.8 <sup>a</sup> , CH              | 3.61 <sup>a</sup> , m                          |
| 30                          | 39.2 <sup>a</sup> , CH <sub>2</sub> | 1.40 <sup>a</sup> , m<br>1.44 <sup>a</sup> , m | 30                          | 39.2 <sup>a</sup> , CH <sub>2</sub> | 1.41 <sup>a</sup> , m<br>1.44 <sup>a</sup> , m |
| 31                          | 23.1, CH <sub>2</sub>               | 1.53 <sup>a</sup> , m                          | 31                          | 23.2, CH <sub>2</sub>               | 1.51 <sup>a</sup> , m                          |
| 32                          | 39.2 <sup>a</sup> , CH <sub>2</sub> | 1.48 <sup>a</sup> , m<br>1.52 <sup>a</sup> , m | 32                          | 39.2 <sup>a</sup> , CH <sub>2</sub> | 1.48 <sup>a</sup> , m<br>1.52 <sup>a</sup> , m |
| 33                          | 69.4, CH                            | 3.84 <sup>a</sup> , m                          | 33                          | 69.4, CH                            | 3.84 <sup>a</sup> , m                          |

|       |                                     |                                                |       |                                     |                                                |
|-------|-------------------------------------|------------------------------------------------|-------|-------------------------------------|------------------------------------------------|
| 34    | 46.0 <sup>a</sup> , CH <sub>2</sub> | 1.51 <sup>a</sup> , m<br>1.59 <sup>a</sup> , m | 34    | 46.3 <sup>a</sup> , CH <sub>2</sub> | 1.51 <sup>a</sup> , m<br>1.59 <sup>a</sup> , m |
| 35    | 66.6, CH                            | 4.10 <sup>a</sup> , m                          | 35    | 66.6, CH                            | 4.10 <sup>a</sup> , m                          |
| 36    | 46.9 <sup>a</sup> , CH <sub>2</sub> | 1.57 <sup>a</sup> , m                          | 36    | 46.9 <sup>a</sup> , CH <sub>2</sub> | 1.58 <sup>a</sup> , m                          |
| 37    | 66.6 <sup>a</sup> , CH              | 4.10 <sup>a</sup> , m                          | 37    | 66.6, CH                            | 4.10 <sup>a</sup> , m                          |
| 38    | 46.9 <sup>a</sup> , CH <sub>2</sub> | 1.58 <sup>a</sup> , m                          | 38    | 46.9 <sup>a</sup> , CH <sub>2</sub> | 1.58 <sup>a</sup> , m                          |
| 39    | 66.6 <sup>a</sup> , CH              | 4.08 <sup>a</sup> , m                          | 39    | 66.6 <sup>a</sup> , CH              | 4.08 <sup>a</sup> , m                          |
| 40    | 44.1, CH <sub>2</sub>               | 1.57 <sup>a</sup> , m<br>1.61 <sup>a</sup> , m | 40    | 44.2, CH <sub>2</sub>               | 1.57 <sup>a</sup> , m<br>1.61 <sup>a</sup> , m |
| 41    | 73.8, CH                            | 4.04, m                                        | 41    | 73.8, CH                            | 4.03, m                                        |
| 42    | 41.1, CH                            | 1.63 <sup>a</sup> , m                          | 42    | 40.9, CH                            | 1.63 <sup>a</sup> , m                          |
| Me-42 | 6.9, CH <sub>3</sub>                | 0.95 <sup>a</sup> , d (6.8)                    | Me-42 | 6.8, CH <sub>3</sub>                | 0.95 <sup>a</sup> , d (6.9)                    |
| 43    | 77.5, CH                            | 3.80 <sup>a</sup> , m                          | 43    | 77.5, CH                            | 3.80 <sup>a</sup> , m                          |
| 44    | 41.9, CH                            | 1.67 <sup>a</sup> , m                          | 44    | 41.9, CH                            | 1.67 <sup>a</sup> , m                          |
| Me-44 | 10.8, CH <sub>3</sub>               | 0.84, d (6.9)                                  | Me-44 | 10.8, CH <sub>3</sub>               | 0.84, d (6.8)                                  |
| 45    | 72.4, CH                            | 4.23 <sup>a</sup> , m                          | 45    | 72.4, CH                            | 4.22 <sup>a</sup> , m                          |
| 46    | 40.8, CH <sub>2</sub>               | 1.58 <sup>a</sup> , m                          | 46    | 40.7, CH <sub>2</sub>               | 1.57 <sup>a</sup> , m                          |
| 47    | 71.6, CH                            | 4.06, m                                        | 47    | 71.6, CH                            | 4.05, m                                        |
| 48    | 38.2, CH <sub>2</sub>               | 1.58 <sup>a</sup> , m<br>1.67 <sup>a</sup> , m | 48    | 38.3, CH <sub>2</sub>               | 1.57 <sup>a</sup> , m<br>1.66 <sup>a</sup> , m |
| 49    | 77.1, CH                            | 3.69 <sup>a</sup> , m                          | 49    | 77.1, CH                            | 3.69 <sup>v</sup> , m                          |
| 50    | 38.5, CH                            | 2.30, m                                        | 50    | 38.5, CH                            | 2.30, m                                        |
| Me-50 | 10.8, CH <sub>3</sub>               | 0.93 <sup>a</sup> , d (6.9)                    | Me-50 | 10.7, CH <sub>3</sub>               | 0.93 <sup>a</sup> , d (6.9)                    |
| 51    | 76.9, CH                            | 4.88, m                                        | 51    | 77.0, CH                            | 4.88, m                                        |
| 52    | 41.1, CH                            | 1.52 <sup>a</sup> , m                          | 52    | 41.1, CH                            | 1.52 <sup>a</sup> , m                          |
| 53    | 24.7, CH <sub>2</sub>               | 1.20 <sup>a</sup> , m<br>1.78 <sup>a</sup> , m | 53    | 24.6, CH <sub>2</sub>               | 1.20 <sup>a</sup> , m<br>1.78 <sup>a</sup> , m |
| 54    | 31.9, CH <sub>2</sub>               | 1.44 <sup>a</sup> , m<br>1.89, m               | 54    | 31.8, CH <sub>2</sub>               | 1.45 <sup>a</sup> , m<br>1.89, m               |
| 55    | 83.9, CH                            | 3.68 <sup>a</sup> , m                          | 55    | 83.8, CH                            | 3.67 <sup>a</sup> , m                          |
| 56    | 43.4, CH                            | 1.73, m                                        | 56    | 43.3, CH                            | 1.73, m                                        |
| Me-56 | 10.7, CH <sub>3</sub>               | 0.94 <sup>a</sup> , d (6.9)                    | Me-56 | 10.8, CH <sub>3</sub>               | 0.94 <sup>a</sup> , d (7.0)                    |
| 57    | 68.8, CH                            | 4.19 <sup>a</sup> , m                          | 57    | 68.8, CH                            | 4.19 <sup>a</sup> , m                          |
| 58    | 44.2, CH <sub>2</sub>               | 1.39 <sup>a</sup> , m<br>1.67 <sup>a</sup> , m | 58    | 44.6, CH <sub>2</sub>               | 1.41 <sup>a</sup> , m<br>1.67 <sup>a</sup> , m |
| 59    | 77.0 <sup>a</sup> , CH              | 3.84 <sup>a</sup> , m                          | 59    | 68.8, CH                            | 3.61, m                                        |
| 60    | 46.0 <sup>a</sup> , CH <sub>2</sub> | 1.58 <sup>a</sup> , m<br>1.63 <sup>a</sup> , m | 60    | 46.0 <sup>a</sup> , CH <sub>2</sub> | 1.58 <sup>a</sup> , m<br>1.63 <sup>a</sup> , m |
| 61    | 77.0 <sup>a</sup> , CH              | 3.84 <sup>a</sup> , m                          | 61    | 76.9, CH                            | 3.83, m                                        |
| 62    | 38.7, CH <sub>2</sub>               | 1.53, m<br>1.41 <sup>a</sup> , m               | 62    | 38.7, CH <sub>2</sub>               | 1.53, m<br>1.41 <sup>a</sup> , m               |
| 63    | 22.6, CH <sub>2</sub>               | 1.41 <sup>a</sup> , m<br>1.61 <sup>a</sup> , m | 63    | 22.5, CH <sub>2</sub>               | 1.41 <sup>a</sup> , m<br>1.61 <sup>a</sup> , m |
| 64    | 38.6, CH <sub>2</sub>               | 1.40 <sup>a</sup> , m<br>1.49 <sup>a</sup> , m | 64    | 38.5, CH <sub>2</sub>               | 1.40 <sup>a</sup> , m<br>1.49 <sup>a</sup> , m |
| 65    | 73.1 <sup>a</sup> , CH              | 3.50 <sup>a</sup> , m                          | 65    | 72.9 <sup>a</sup> , CH              | 3.50 <sup>a</sup> , m                          |
| 66    | 36.1, CH <sub>2</sub>               | 1.36, m<br>1.51 <sup>a</sup> , m               | 66    | 36.1, CH <sub>2</sub>               | 1.35 <sup>a</sup> , m<br>1.51 <sup>a</sup> , m |
| 67    | 34.2 <sup>a</sup> , CH <sub>2</sub> | 1.10 <sup>a</sup> , m<br>1.50 <sup>a</sup> , m | 67    | 34.2 <sup>a</sup> , CH <sub>2</sub> | 1.11 <sup>a</sup> , m<br>1.50 <sup>a</sup> , m |
| 68    | 34.2 <sup>a</sup> , CH              | 1.42 <sup>a</sup> , m                          | 68    | 34.2 <sup>a</sup> , CH              | 1.43 <sup>a</sup> , m                          |
| Me-68 | 20.2, CH <sub>3</sub>               | 0.92 <sup>a</sup> , d (6.5)                    | Me-68 | 20.2, CH <sub>3</sub>               | 0.92 <sup>a</sup> , d (6.5)                    |
| 69    | 37.7, CH <sub>2</sub>               | 1.20 <sup>a</sup> , m<br>1.39 <sup>a</sup> , m | 69    | 37.7, CH <sub>2</sub>               | 1.19 <sup>a</sup> , m<br>1.38 <sup>a</sup> , m |
| 70    | 25.1, CH <sub>2</sub>               | 1.39 <sup>a</sup> , m                          | 70    | 25.1, CH <sub>2</sub>               | 1.39 <sup>a</sup> , m                          |

|        |                                     |                                    |       |                                     |                                    |
|--------|-------------------------------------|------------------------------------|-------|-------------------------------------|------------------------------------|
|        |                                     | 1.45 <sup>a</sup> , m              |       |                                     | 1.44 <sup>a</sup> , m              |
| 71     | 29.1, CH <sub>2</sub>               | 1.64 <sup>a</sup> , m              | 71    | 29.1, CH <sub>2</sub>               | 1.64 <sup>a</sup> , m              |
| 72     | 40.9, CH <sub>2</sub>               | 2.92, t (7.7)                      | 72    | 40.9, CH <sub>2</sub>               | 2.92, t (7.7)                      |
| 1'     | 34.4 <sup>b</sup> , CH <sub>2</sub> | 1.09, m                            | 1'    | 34.4 <sup>a</sup> , CH <sub>2</sub> | 1.10, m                            |
|        |                                     | 1.36 <sup>a</sup> , m              |       |                                     | 1.35 <sup>a</sup> , m              |
| 2'     | 21.6, CH <sub>2</sub>               | 1.29, m                            | 2'    | 21.6, CH <sub>2</sub>               | 1.28, m                            |
|        |                                     | 1.48 <sup>a</sup> , m              |       |                                     | 1.48 <sup>a</sup> , m              |
| 3'     | 14.9, CH <sub>3</sub>               | 0.89 <sup>a</sup> , t (7.2)        | 3'    | 14.9, CH <sub>3</sub>               | 0.89 <sup>a</sup> , t (7.2)        |
| Man-1  | 97.1, CH                            | 4.58, br s                         | Man-1 | 96.9, CH                            | 4.58, br s                         |
| Man-2  | 73.1 <sup>a</sup> , CH              | 3.81 <sup>a</sup> , m              | Man-2 | 73.1 <sup>a</sup> , CH              | 3.81 <sup>a</sup> , m              |
| Man-3  | 75.4, CH                            | 3.47, dd (9.5, 3.2)                | Man-3 | 75.4, CH                            | 3.47, dd (9.5, 3.2)                |
| Man-4  | 68.6 <sup>a</sup> , CH              | 3.67 <sup>a</sup> , t (9.5)        | Man-4 | 68.8 <sup>a</sup> , CH              | 3.61 <sup>a</sup> , t (9.5)        |
| Man-5  | 78.5, CH                            | 3.17, m                            | Man-5 | 78.6, CH                            | 3.15, m                            |
| Man-6  | 62.8 <sup>a</sup> , CH <sub>2</sub> | 3.75 <sup>m'</sup> , m             | Man-6 | 62.9 <sup>a</sup> , CH <sub>2</sub> | 3.74 <sup>m'</sup> , m             |
|        |                                     | 3.87 <sup>a</sup> , m              |       |                                     | 3.87 <sup>a</sup> , m              |
| Glc-1  | 102.4, CH                           | 4.20 <sup>a</sup> , d (7.8)        | Glc-1 | 102.4, CH                           | 4.22 <sup>a</sup> , d (7.8)        |
| Glc-2  | 74.9, CH                            | 3.20 <sup>a</sup> , m              | Glc-2 | 74.9, CH                            | 3.20 <sup>a</sup> , m              |
| Glc-3  | 78.2, CH                            | 3.33 <sup>a</sup> , m              | Glc-3 | 78.2, CH                            | 3.33 <sup>a</sup> , m              |
| Glc-4  | 71.8, CH                            | 3.32 <sup>a</sup> , m              | Glc-4 | 71.7, CH                            | 3.33 <sup>a</sup> , m              |
| Glc-5  | 78.3 <sup>a</sup> , CH              | 3.21 <sup>a</sup> , m              | Glc-5 | 78.3 <sup>a</sup> , CH              | 3.21 <sup>a</sup> , m              |
| Glc-6  | 62.8 <sup>a</sup> , CH <sub>2</sub> | 3.68 <sup>a</sup> , m              | Glc-6 | 62.9 <sup>a</sup> , CH <sub>2</sub> | 3.68 <sup>a</sup> , m              |
|        |                                     | 3.84 <sup>a</sup> , m              |       |                                     | 3.85 <sup>a</sup> , m              |
| maG-1  | 104.4, CH                           | 4.46, d (7.5)                      | maG-1 | 104.7, CH                           | 4.45, d (7.4)                      |
| maG-2  | 70.5, CH                            | 3.50 <sup>a</sup> , dd (10.4, 7.5) | maG-2 | 70.6, CH                            | 3.49 <sup>a</sup> , dd (10.6, 7.4) |
| maG-3  | 66.1, CH                            | 3.06, t (10.4)                     | maG-3 | 66.0, CH                            | 3.05, t (10.6)                     |
| maG-4  | 71.5, CH                            | 3.39 <sup>a</sup> , dd (10.4, 8.7) | maG-4 | 71.5, CH                            | 3.38 <sup>a</sup> , dd (10.6, 8.8) |
| maG-5  | 74.4, CH                            | 3.40, dq (8.7, 6.2)                | maG-5 | 74.3, CH                            | 3.41, dq (8.8, 6.1)                |
| maG-6  | 18.4, CH <sub>3</sub>               | 1.34 <sup>a</sup> , d (6.2)        | maG-6 | 18.4, CH <sub>3</sub>               | 1.33 <sup>a</sup> , d (6.1)        |
| N-Me   | 31.1, CH <sub>3</sub>               | 2.81, br s                         | N-Me  | 31.1, CH <sub>3</sub>               | 2.81, br s                         |
| Ara-1  | 108.3, CH                           | 5.01, d (1.6)                      | Ara-1 | 108.2, CH                           | 5.01, d (1.5)                      |
| Ara-2  | 83.9, CH                            | 3.96, dd (3.9, 1.6)                | Ara-2 | 83.9, CH                            | 3.96, dd (3.9, 1.5)                |
| Ara-3  | 78.7, CH                            | 3.86 <sup>a</sup> , m              | Ara-3 | 78.6, CH                            | 3.85 <sup>a</sup> , m              |
| Ara-4  | 85.4, CH                            | 3.98, m                            | Ara-4 | 85.4, CH                            | 3.98, m                            |
| Ara-5  | 63.2, CH <sub>2</sub>               | 3.64 <sup>a</sup> , m              | Ara-5 | 63.2, CH <sub>2</sub>               | 3.64 <sup>a</sup> , m              |
|        |                                     | 3.74 <sup>a</sup> , m              |       |                                     | 3.75 <sup>a</sup> , m              |
| Glc'-1 | 103.9, CH                           | 4.33, d (7.6)                      |       |                                     |                                    |
| Glc'-2 | 75.2, CH                            | 3.21 <sup>a</sup> , m              |       |                                     |                                    |
| Glc'-3 | 78.3 <sup>a</sup> , CH              | 3.37 <sup>a</sup> , m              |       |                                     |                                    |
| Glc'-4 | 72.5, CH                            | 3.23 <sup>a</sup> , m              |       |                                     |                                    |
| Glc'-5 | 78.3 <sup>a</sup> , CH              | 3.21 <sup>a</sup> , m              |       |                                     |                                    |
| Glc'-6 | 63.4, CH <sub>2</sub>               | 3.93, m                            |       |                                     |                                    |
|        |                                     | 3.70 <sup>a</sup> , m              |       |                                     |                                    |

<sup>a</sup> Overlapping with other isochronous <sup>13</sup>C-NMR / <sup>1</sup>H-NMR signals.

\* No multiplicity is given (m) for <sup>1</sup>H-NMR signals for which coupling constants (*J*s) could not be measured directly in <sup>1</sup>H or JRES spectra nor determined from HSQC traces. The assignments were supported by HSQC, HMBC, TOCSY and HSQC-TOCSY.

Figure S4. 1D/2D NMR spectra of gargantulide B (1)

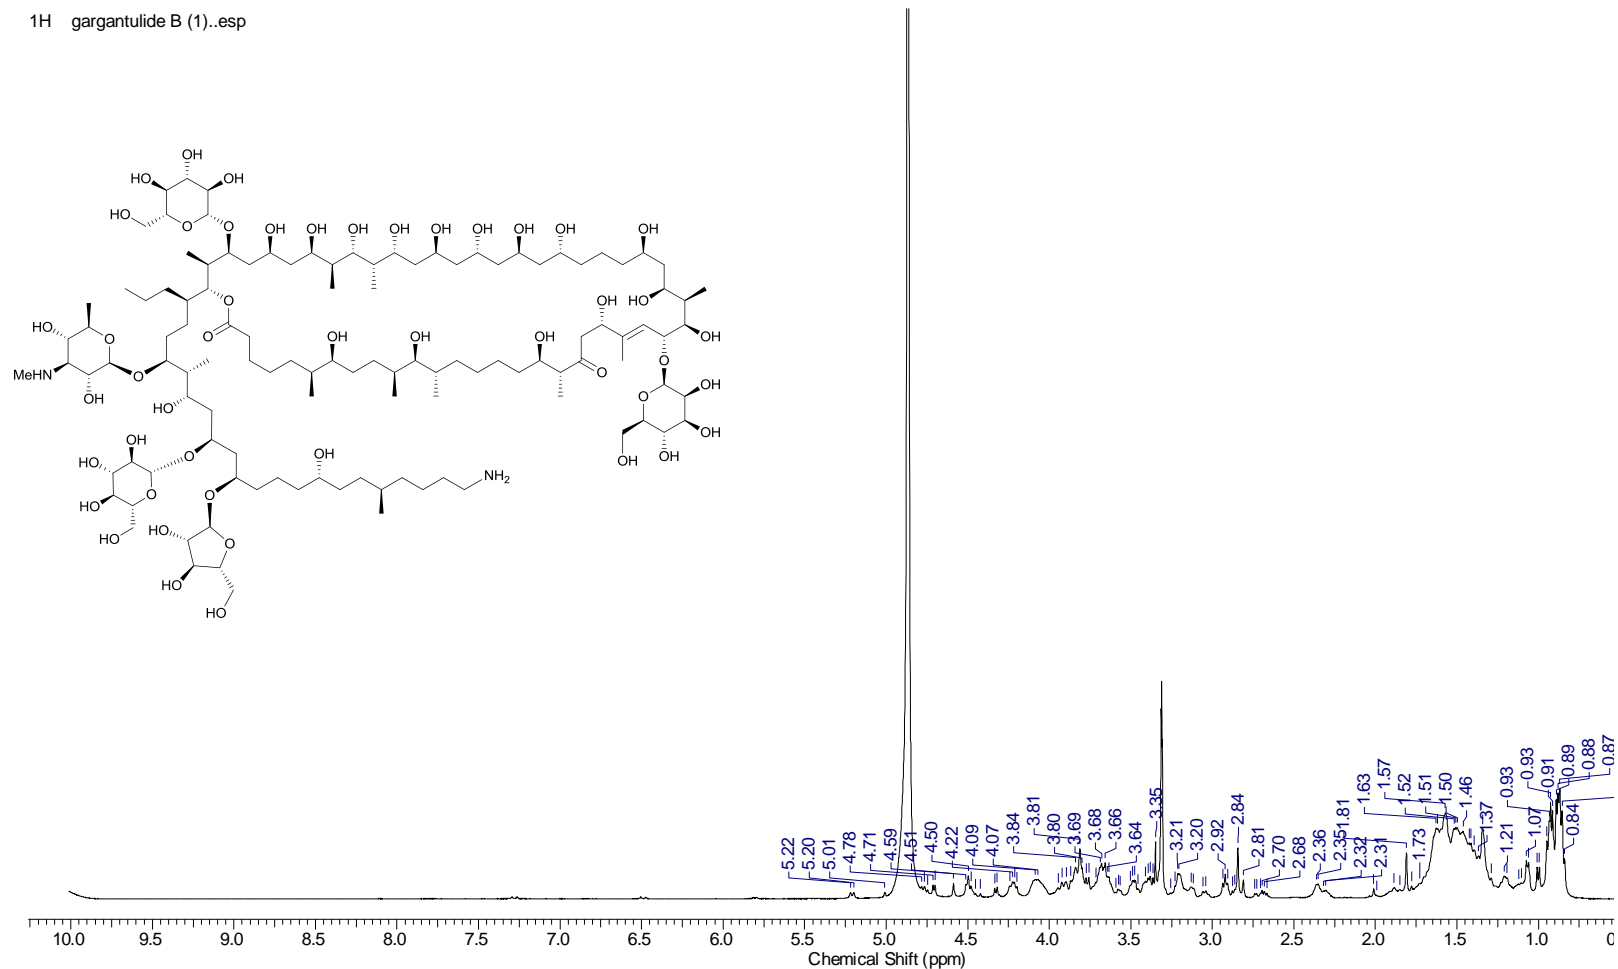

a)  $^1\text{H}$  NMR spectrum ( $\text{CD}_3\text{OD}$ , 500 MHz) of **1**. Full scale (0-10 ppm)



1H gargantulide B (1)..esp

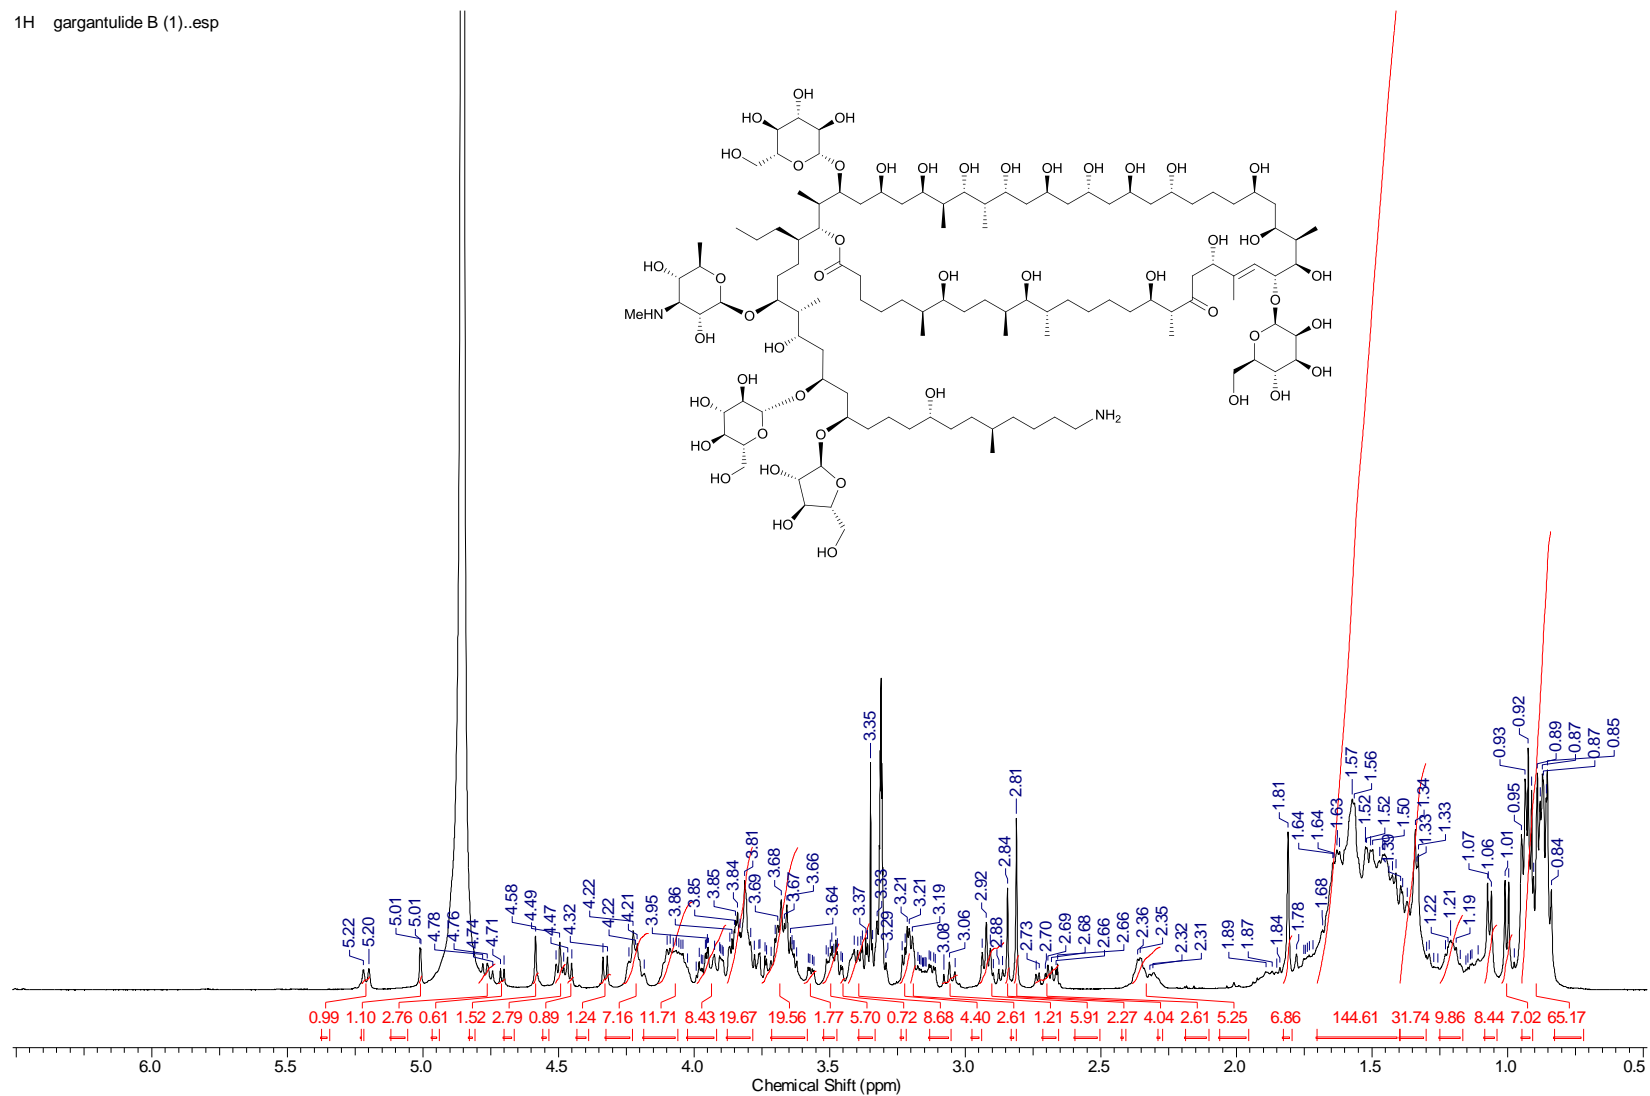

b)  $^1\text{H}$  NMR spectrum ( $\text{CD}_3\text{OD}$ , 500 MHz) of **1**. Expansion between 0 and 7 ppm showing integral values

13C gargantulide B (1).esp

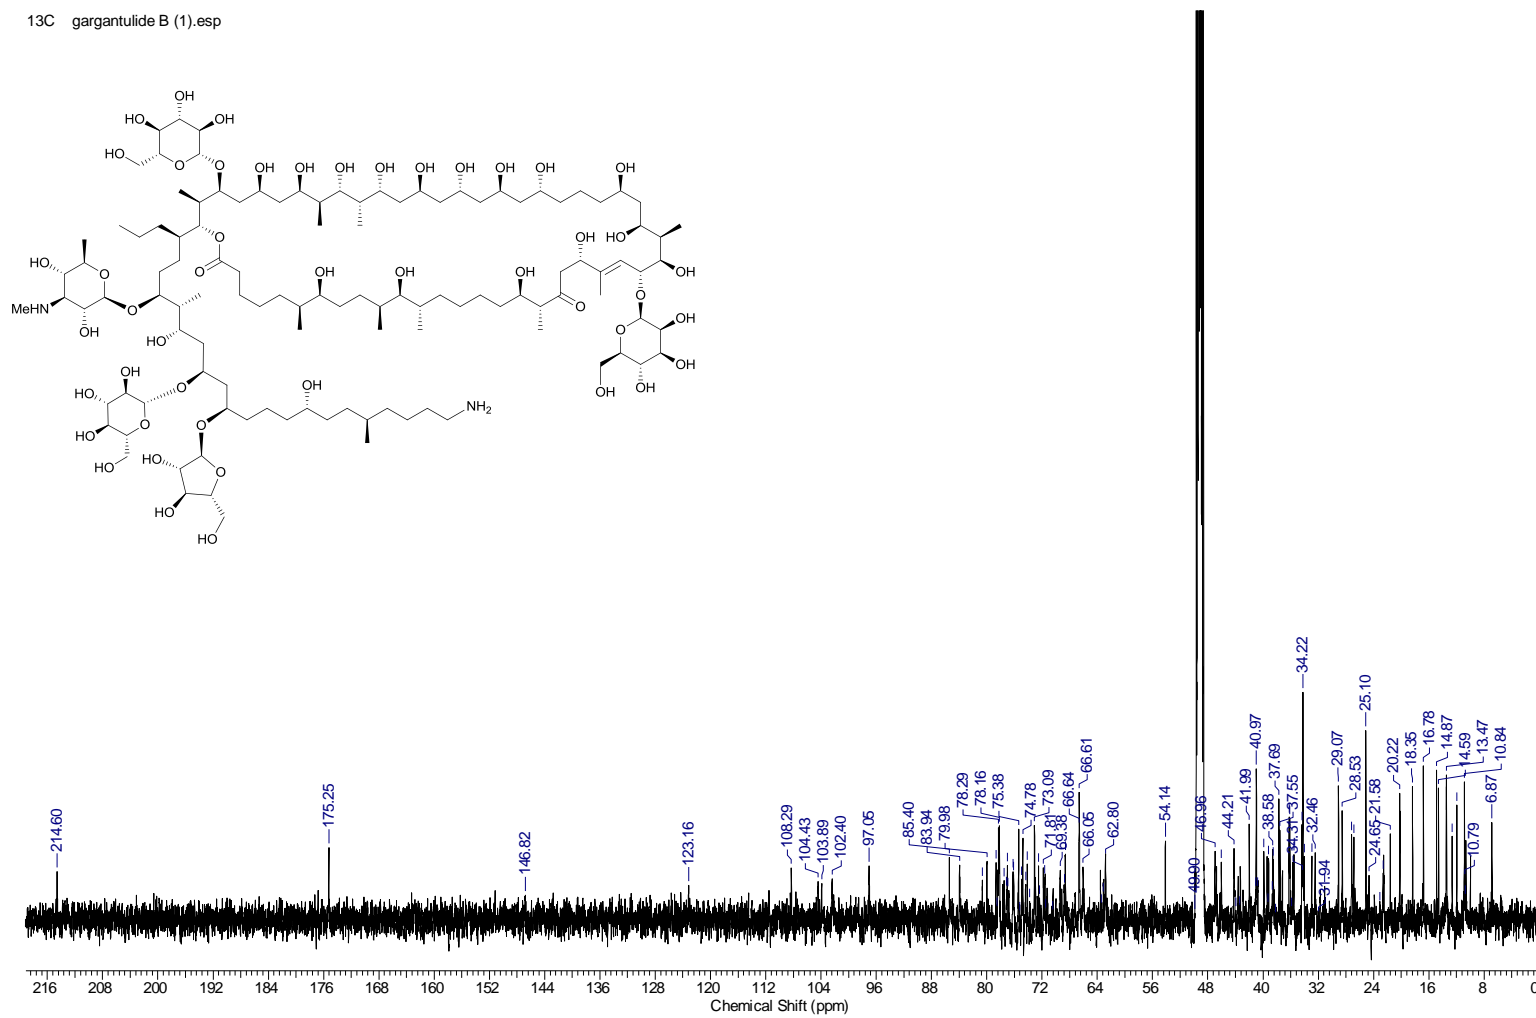

c) <sup>13</sup>C NMR spectrum (CD<sub>3</sub>OD, 125 MHz) of **1**

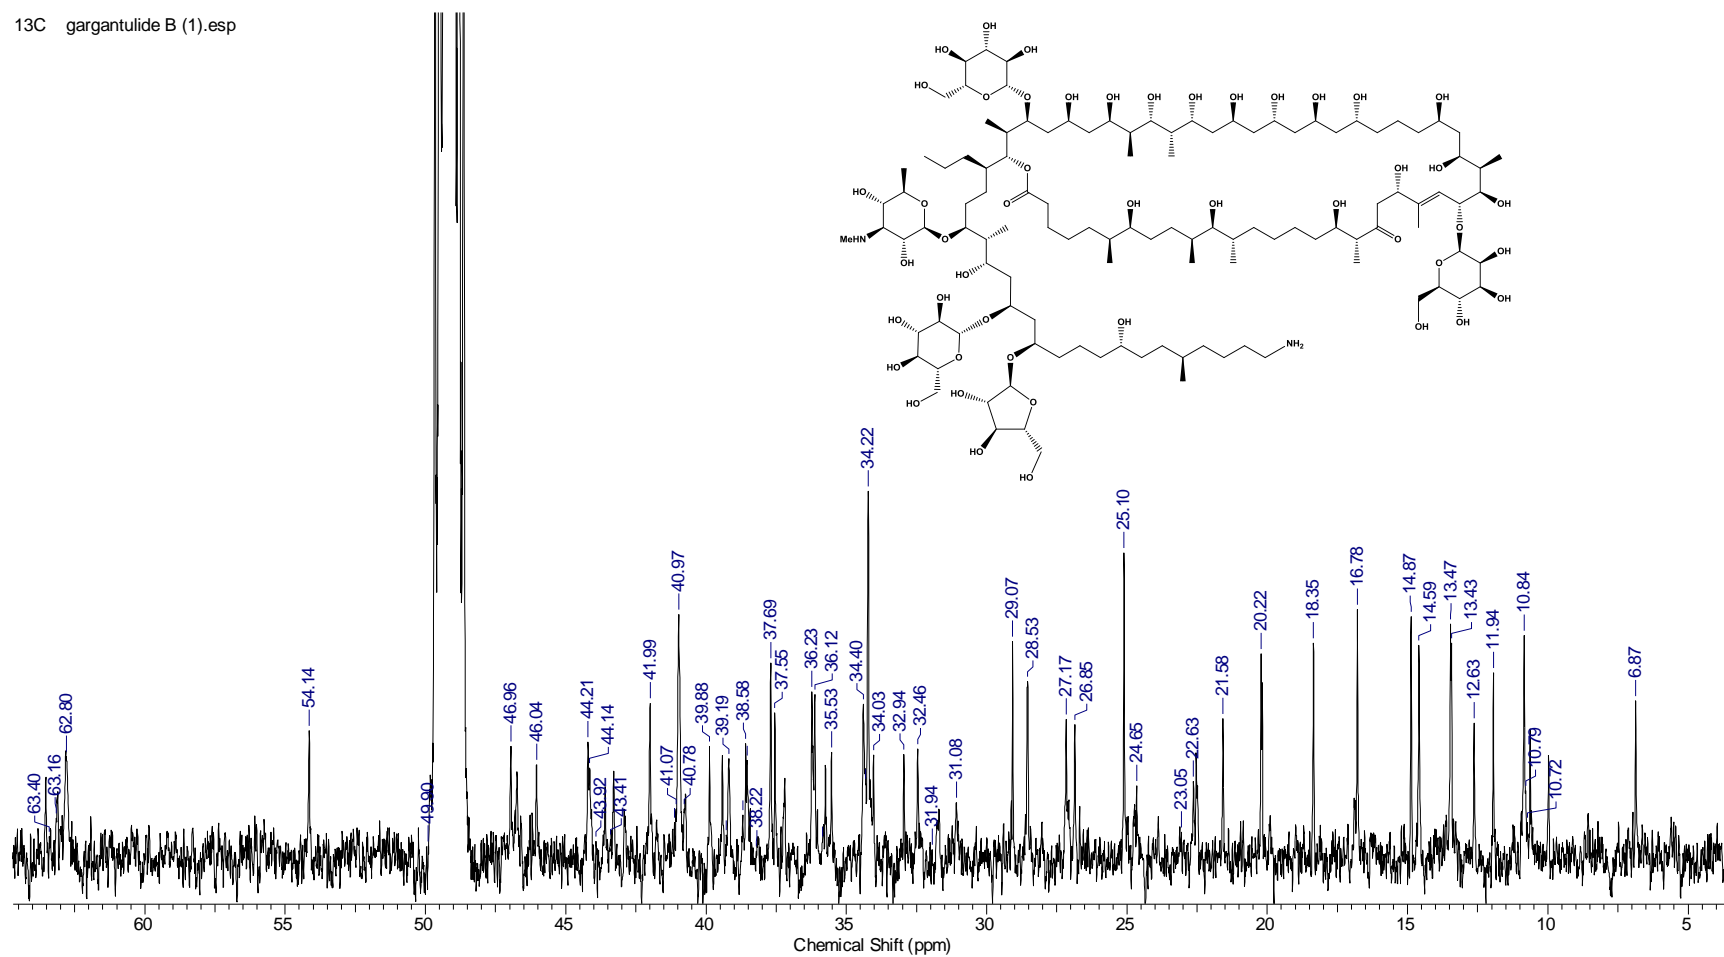d)  $^{13}\text{C}$  NMR spectrum ( $\text{CD}_3\text{OD}$ , 125 MHz) of **1**. Expansion between 0 and 65 ppm

13C gargantulide B (1).esp

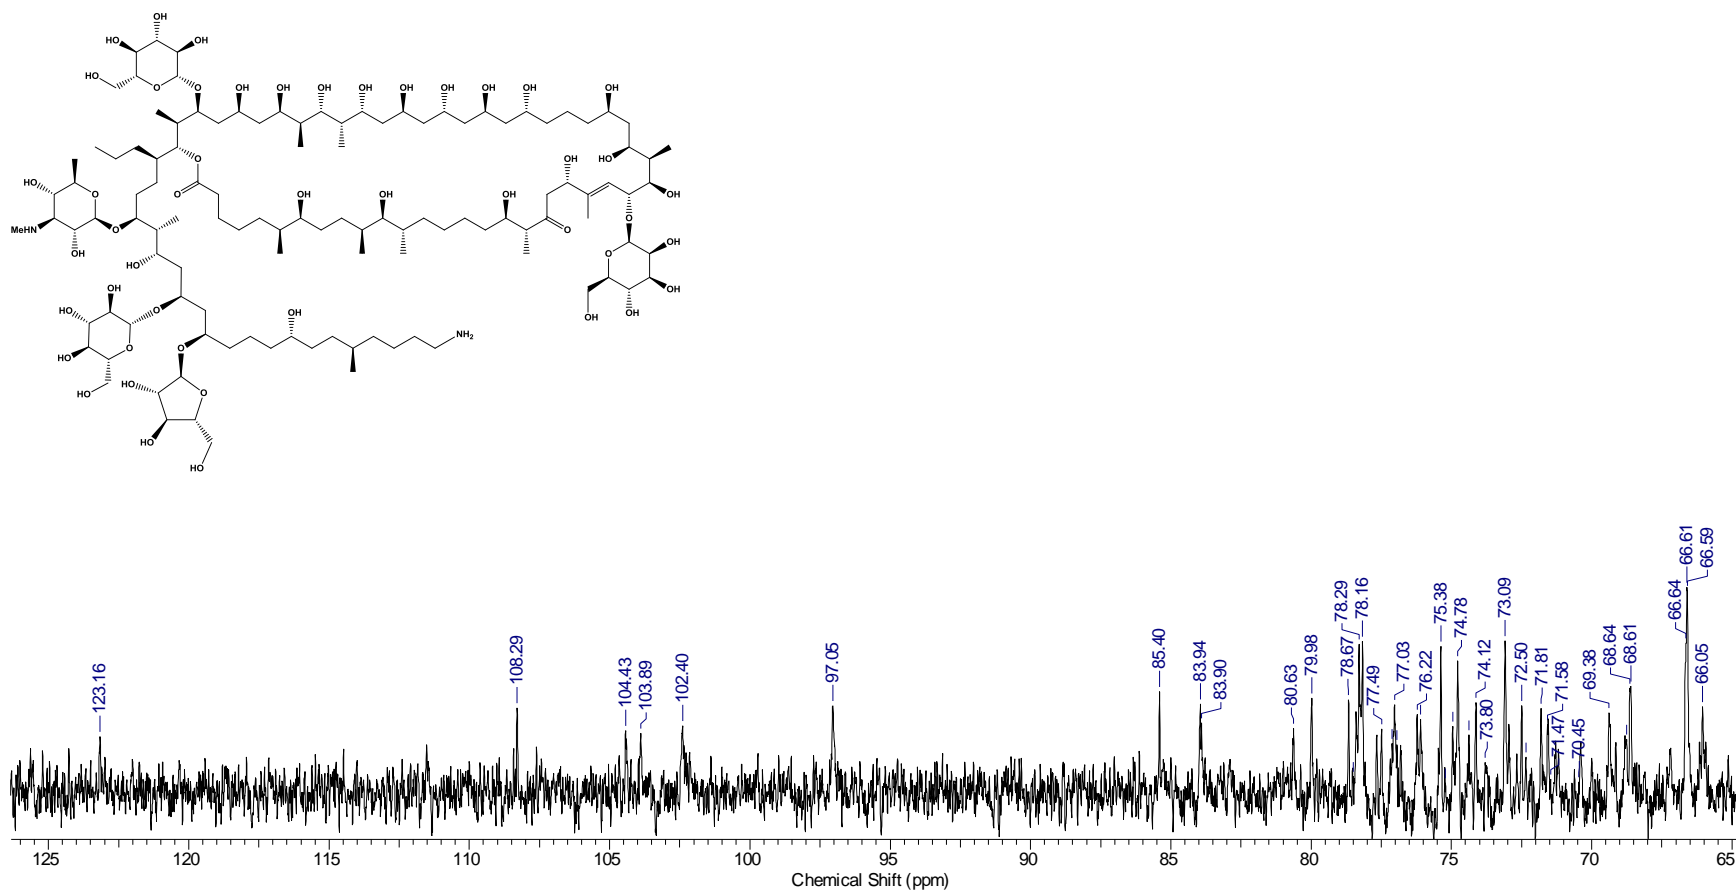

e) <sup>13</sup>C NMR spectrum (CD<sub>3</sub>OD, 125 MHz) of **1**. Expansion between 65 and 125 ppm

COSY gargantulide B (1).esp

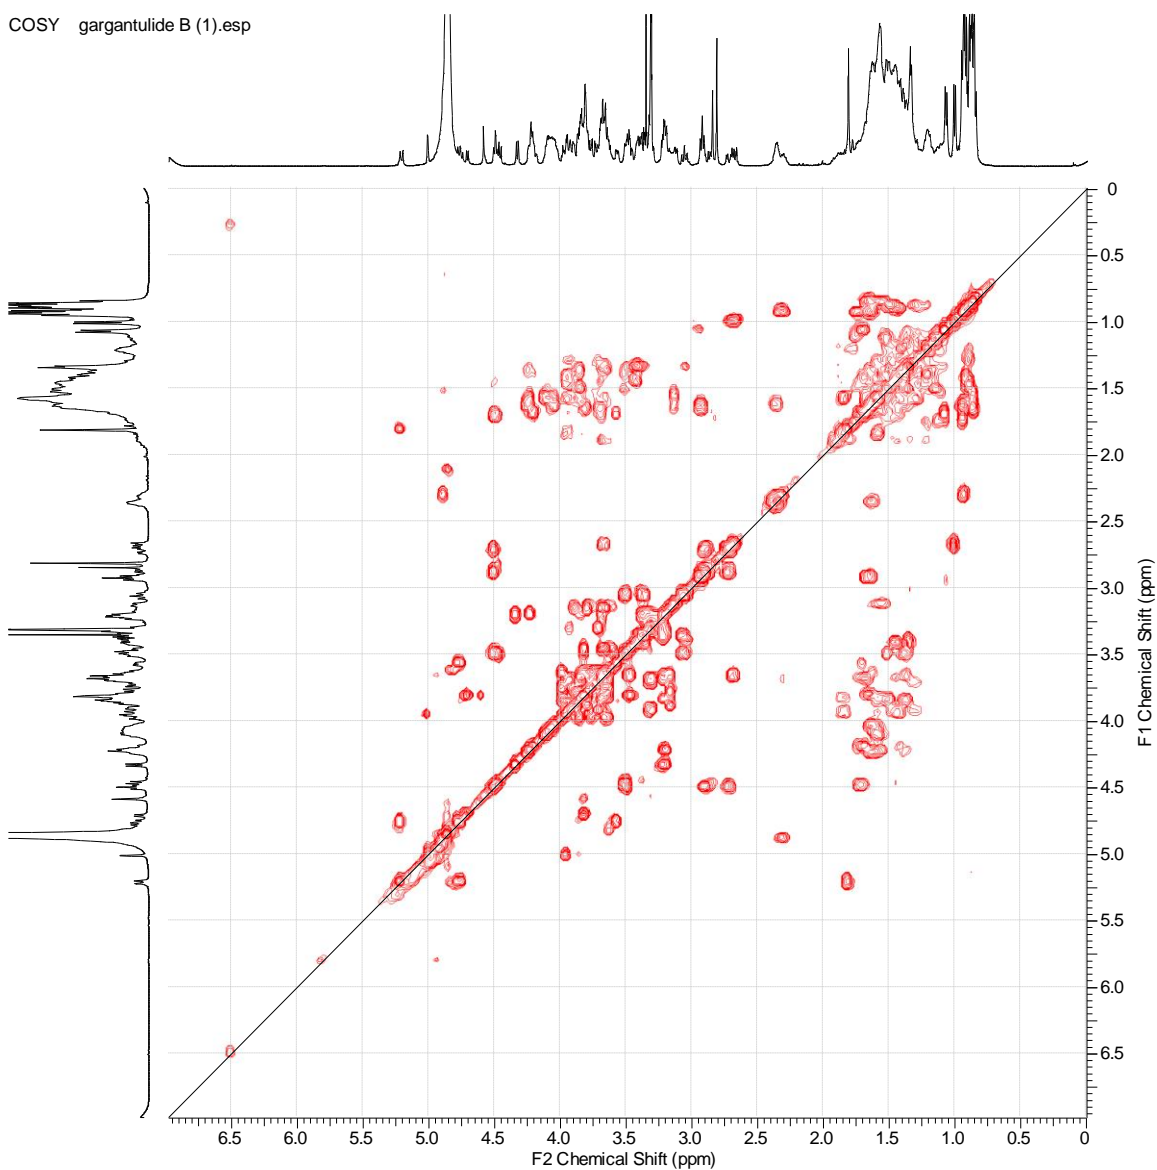

f) COSY spectrum of **1**

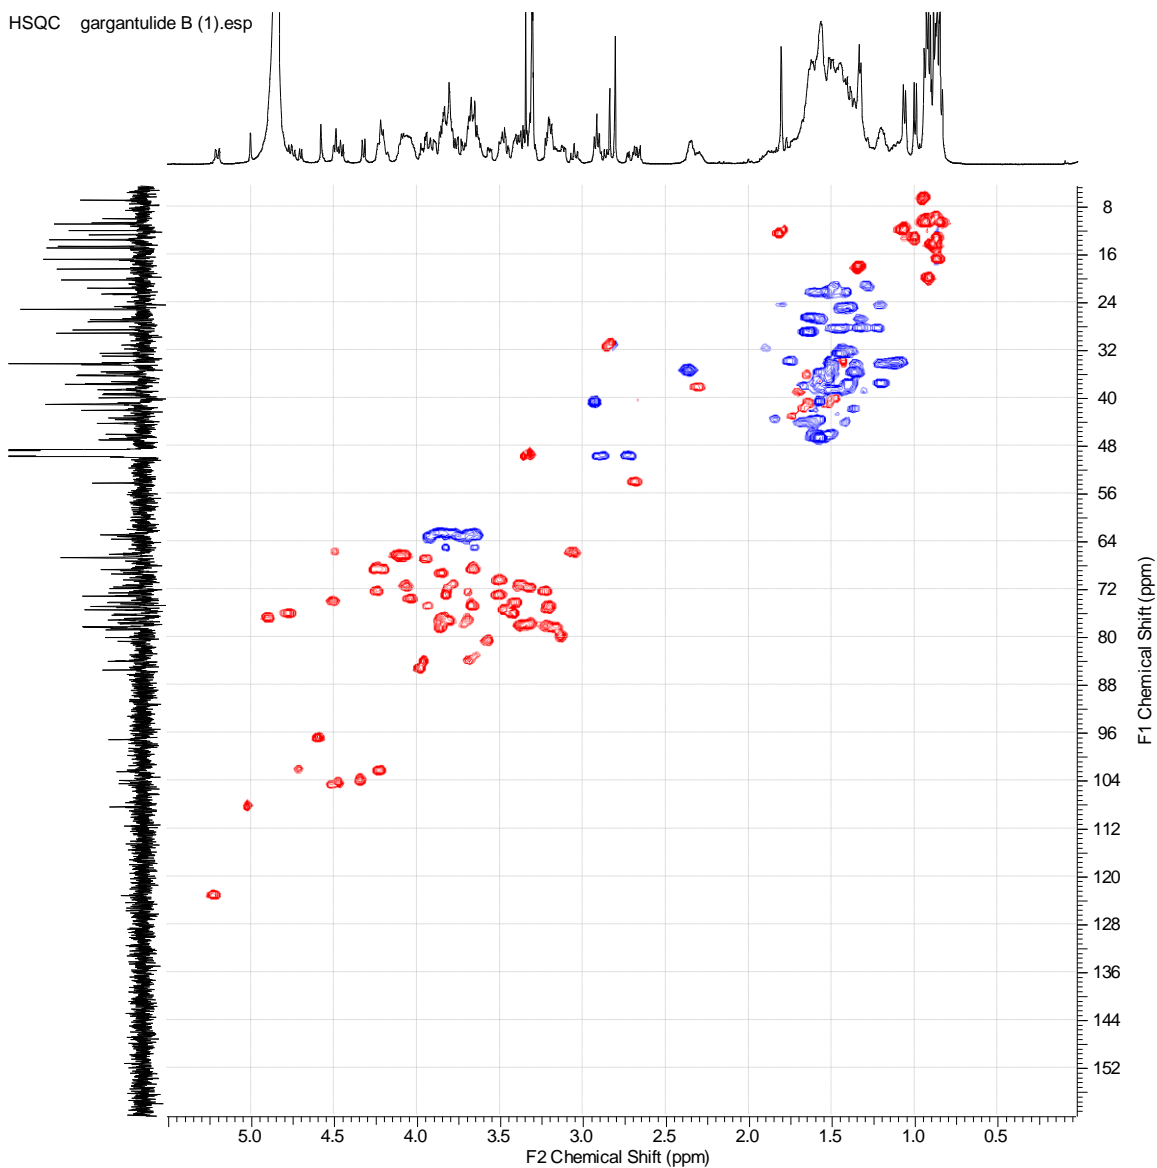

g) HSQC spectrum of **1**

HMBC gargantulide B (1).esp

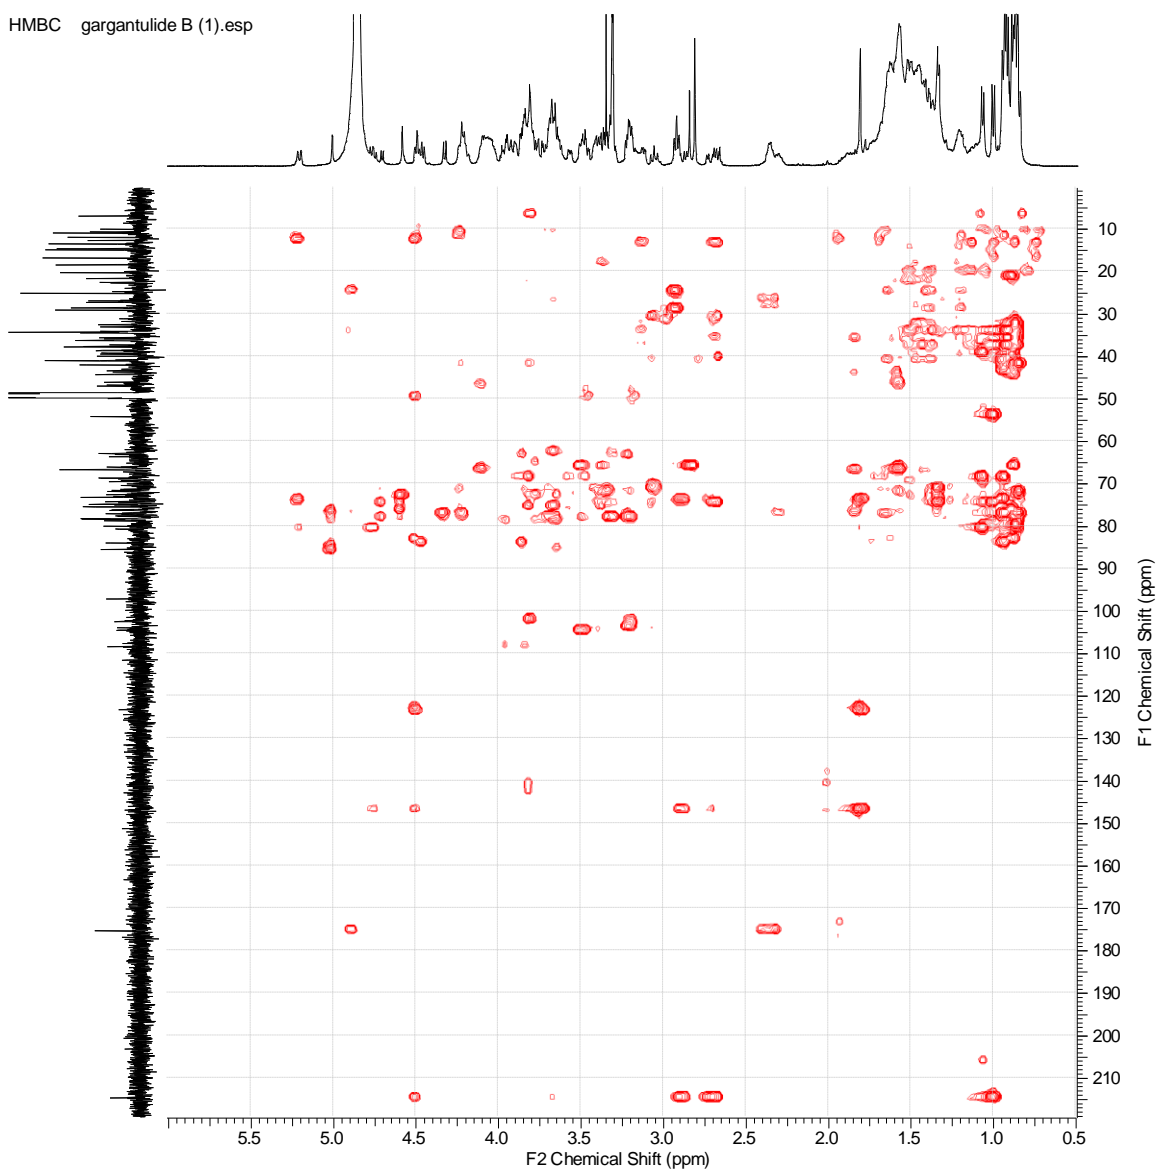

h) HMBC spectrum of **1**

TOCSY gargantulide B (1).esp

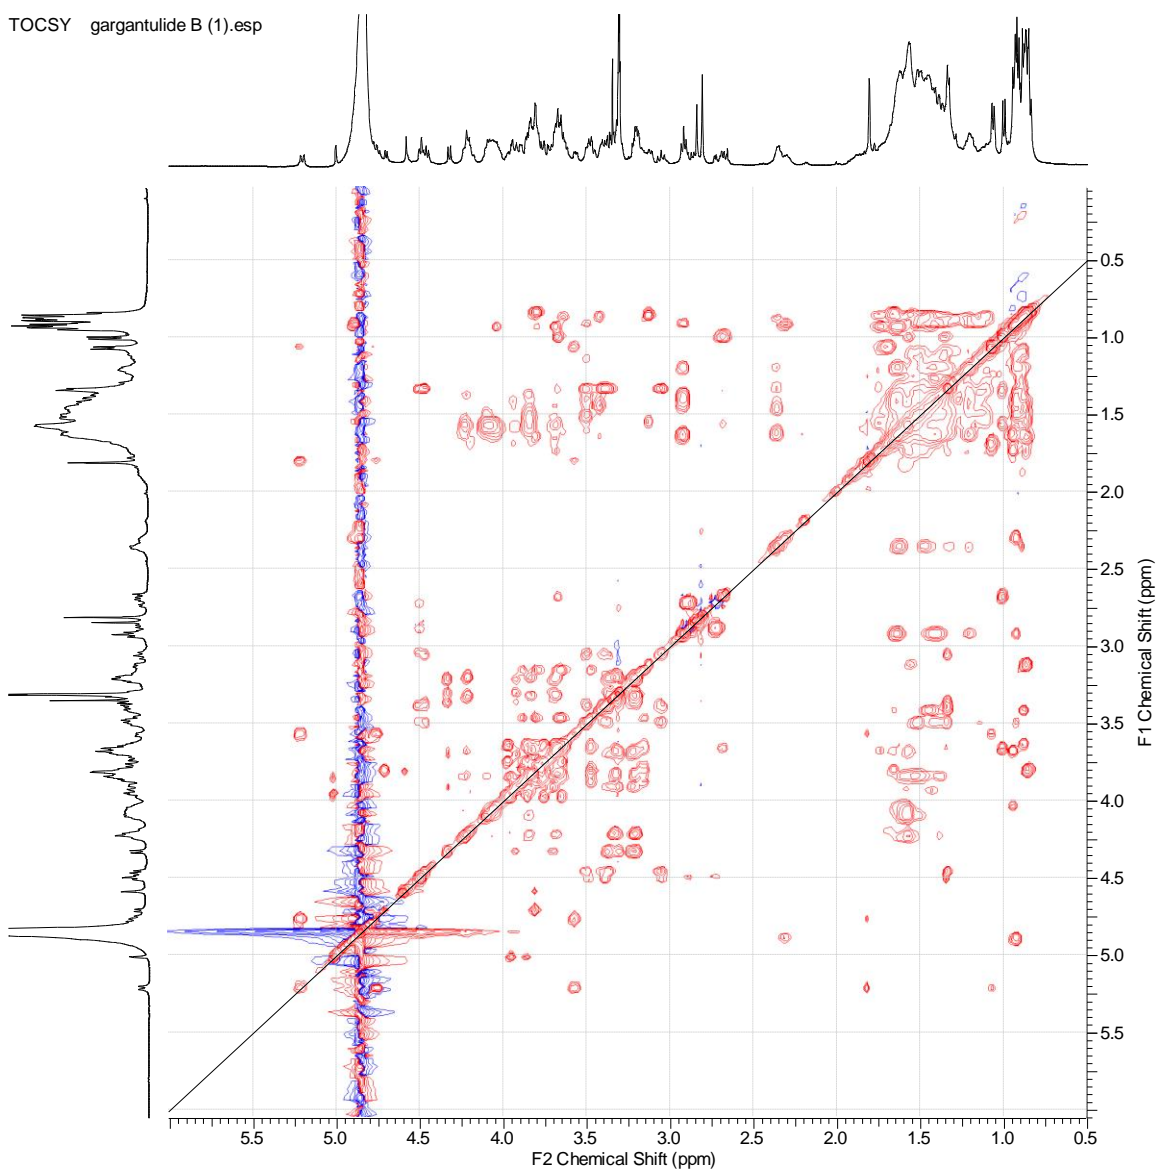

i) TOCSY spectrum of **1**



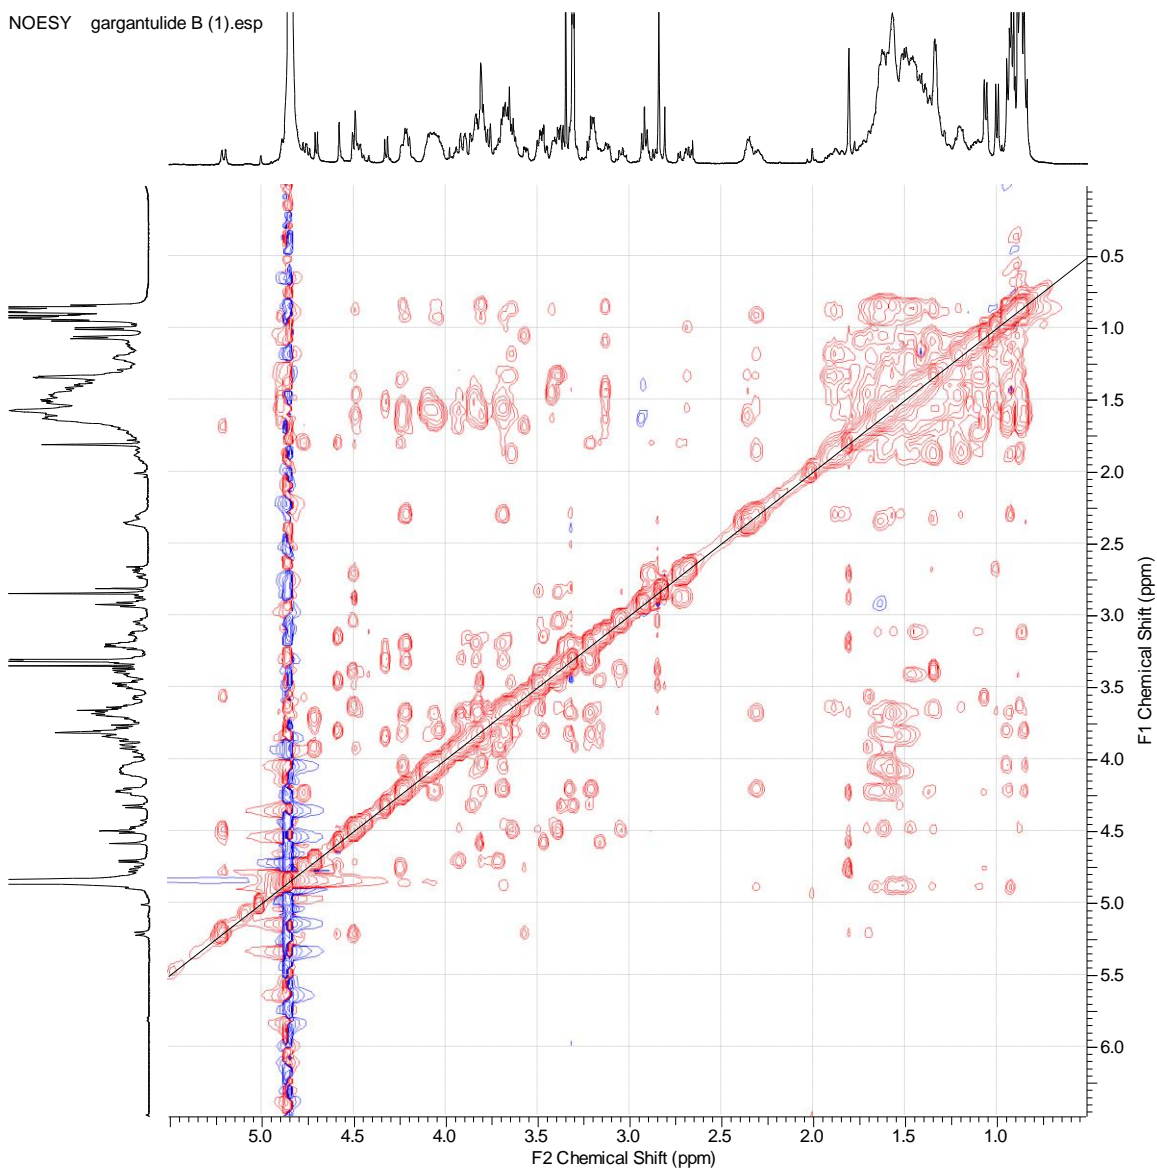

j) NOESY spectrum of **1**

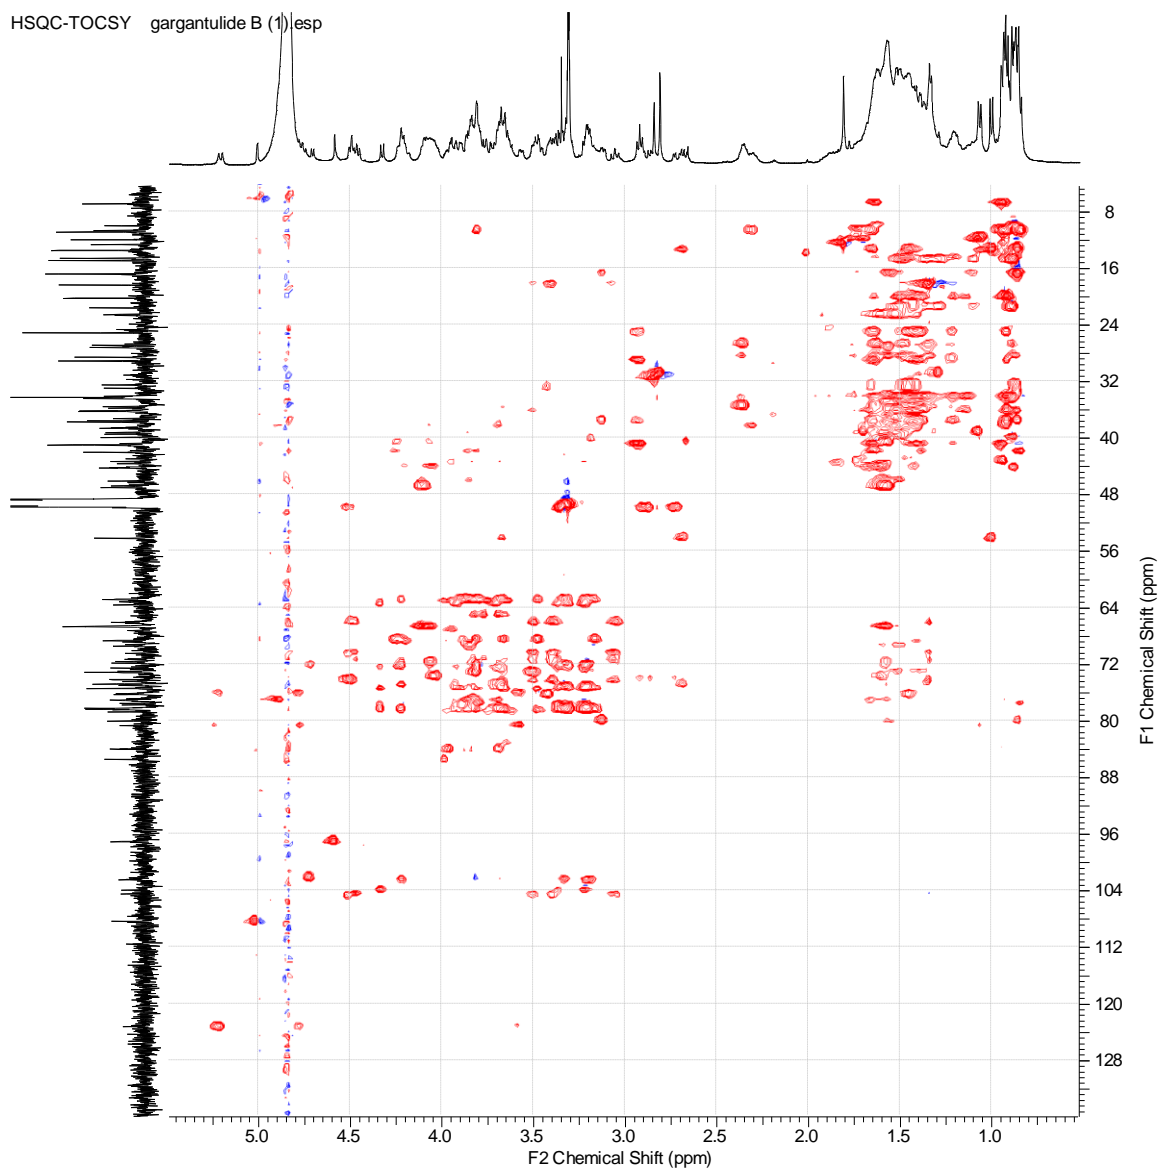

k) HSQC-TOCSY spectrum of **1**

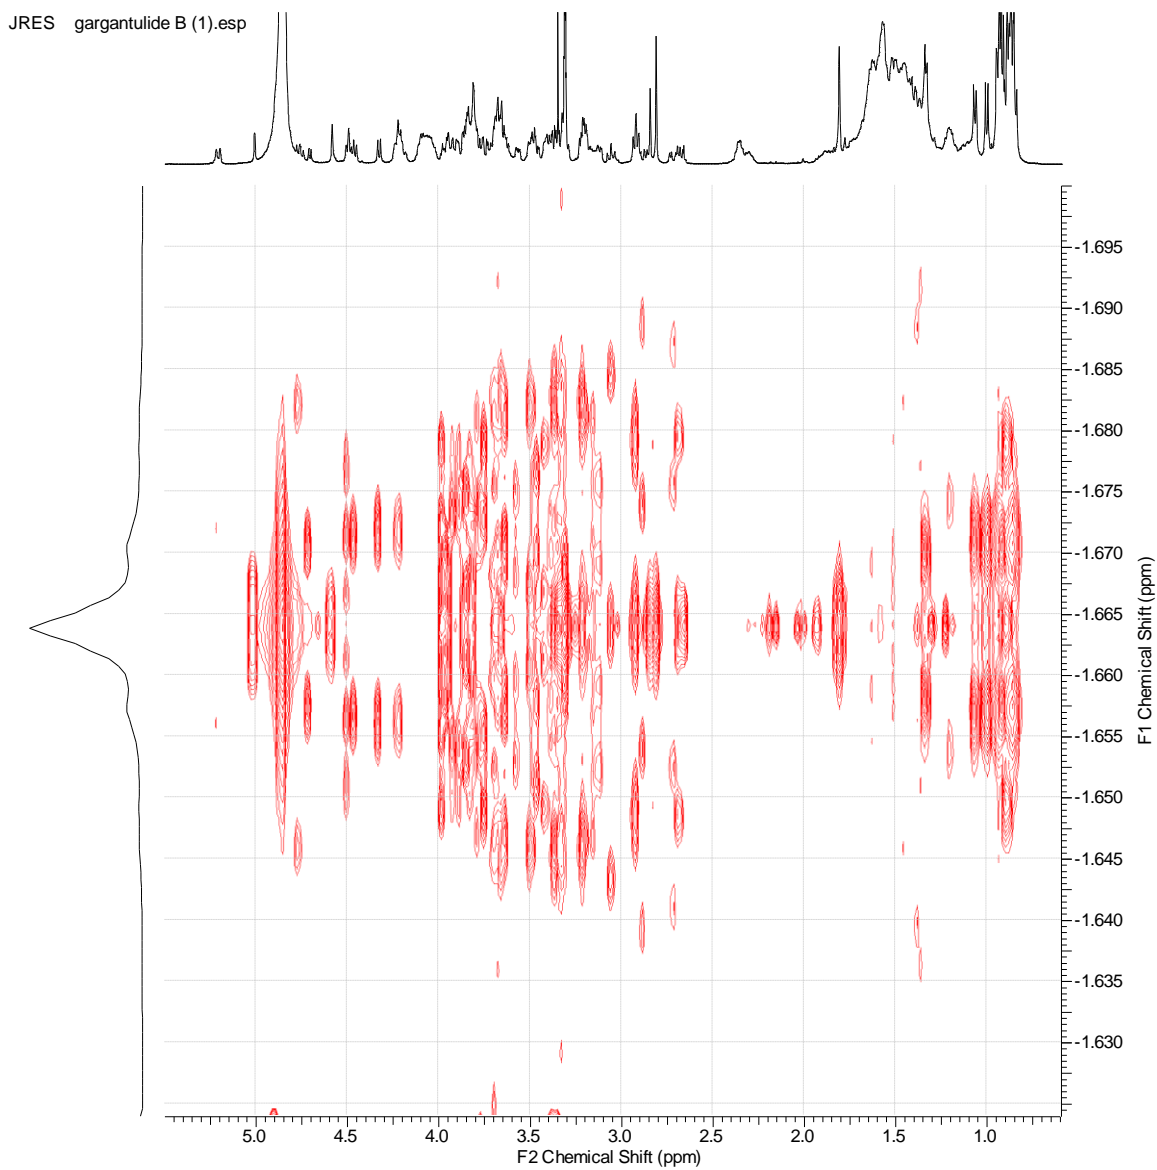

l) JRES spectrum of **1**

Figure S5. 1D/2D NMR spectra of gargantulide C (**2**)

1H gargantulide C (2)..esp

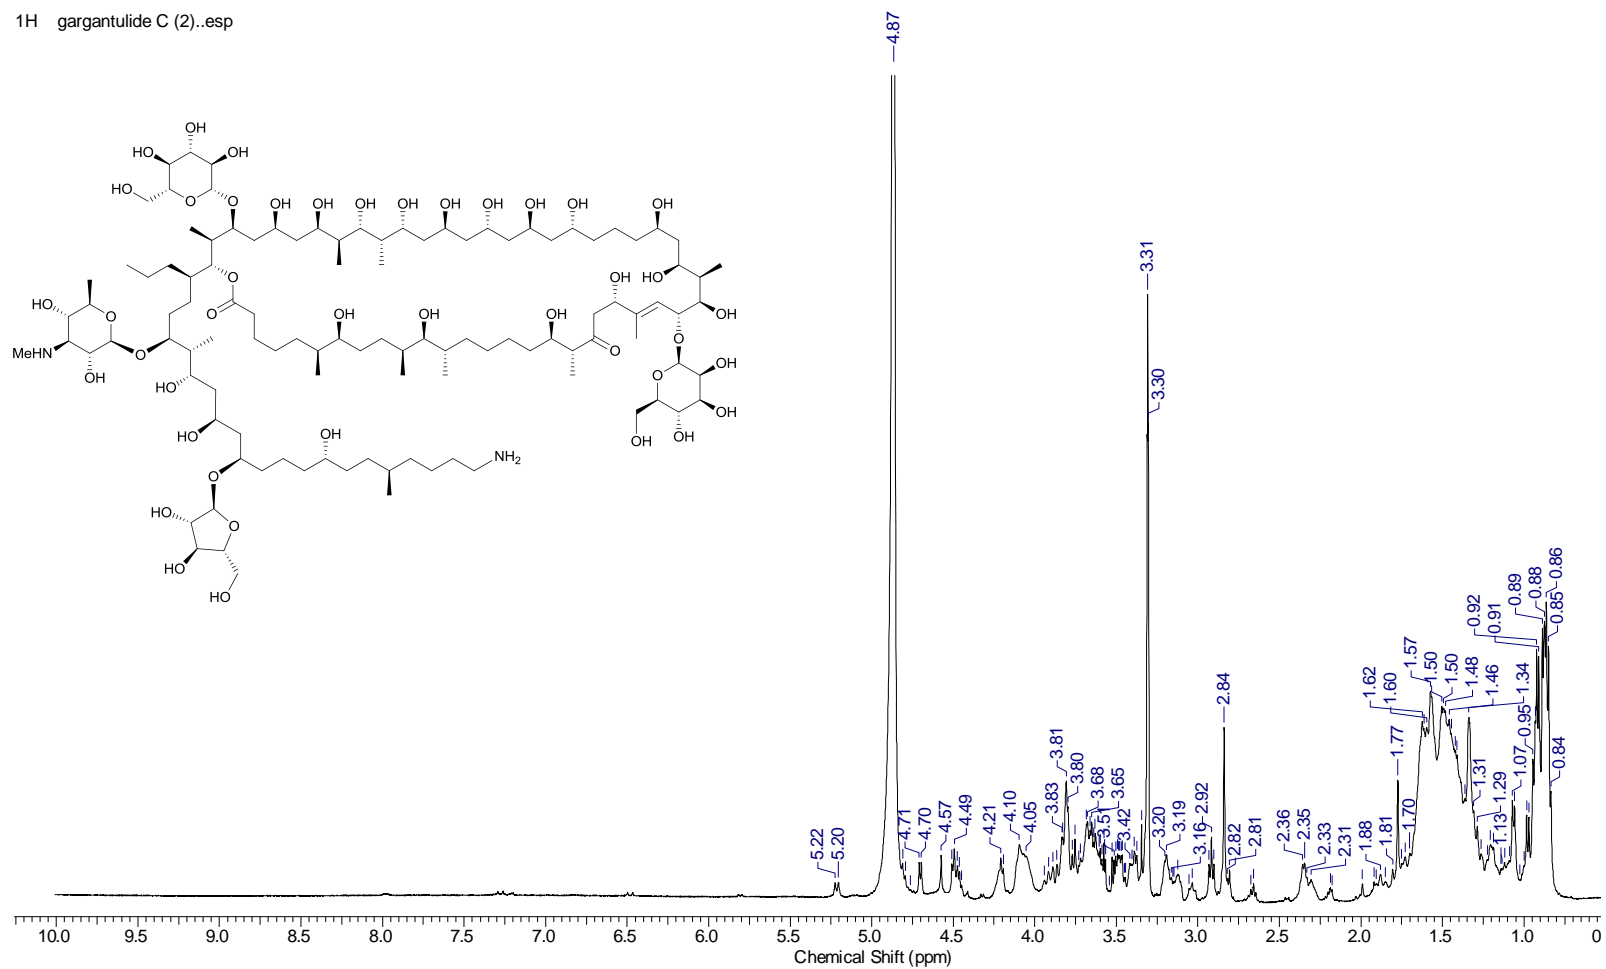

a)  $^1\text{H}$  NMR spectrum ( $\text{CD}_3\text{OD}$ , 500 MHz) of **2**. Full scale (0-10 ppm)

1H gargantulide C (2).esp

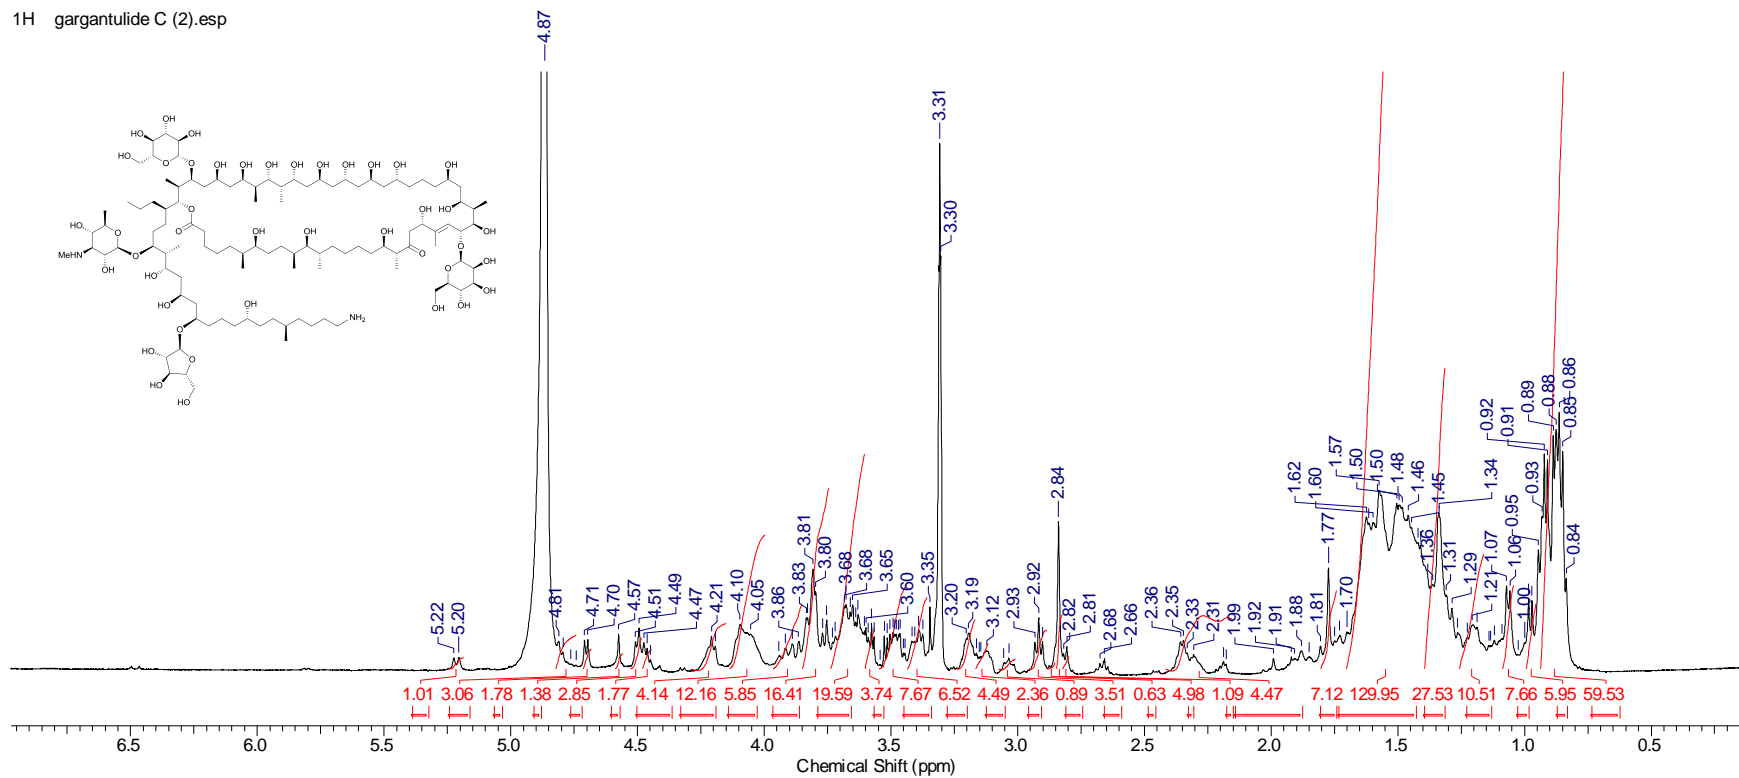

b) <sup>1</sup>H NMR spectrum (CD<sub>3</sub>OD, 500 MHz) of **2**. Expansion between 0 and 7 ppm showing integral values

13C gargantulide C (2).esp

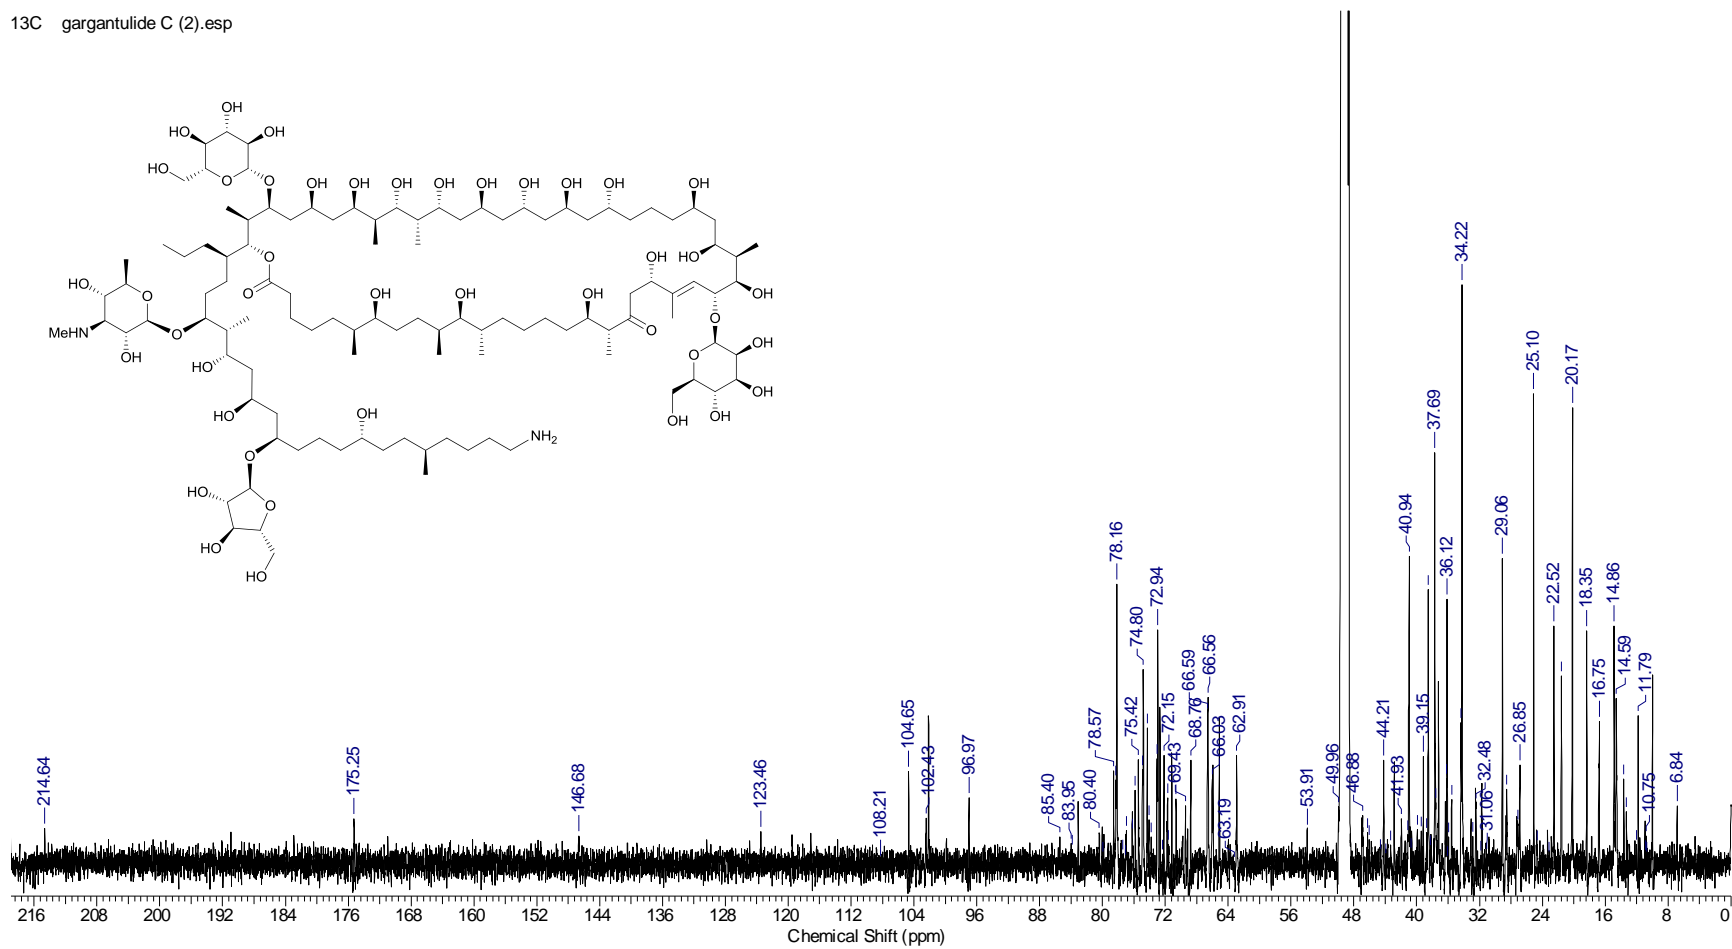

c) <sup>13</sup>C NMR spectrum (CD<sub>3</sub>OD, 125 MHz) of **2**

13C gargantulide C (2).esp

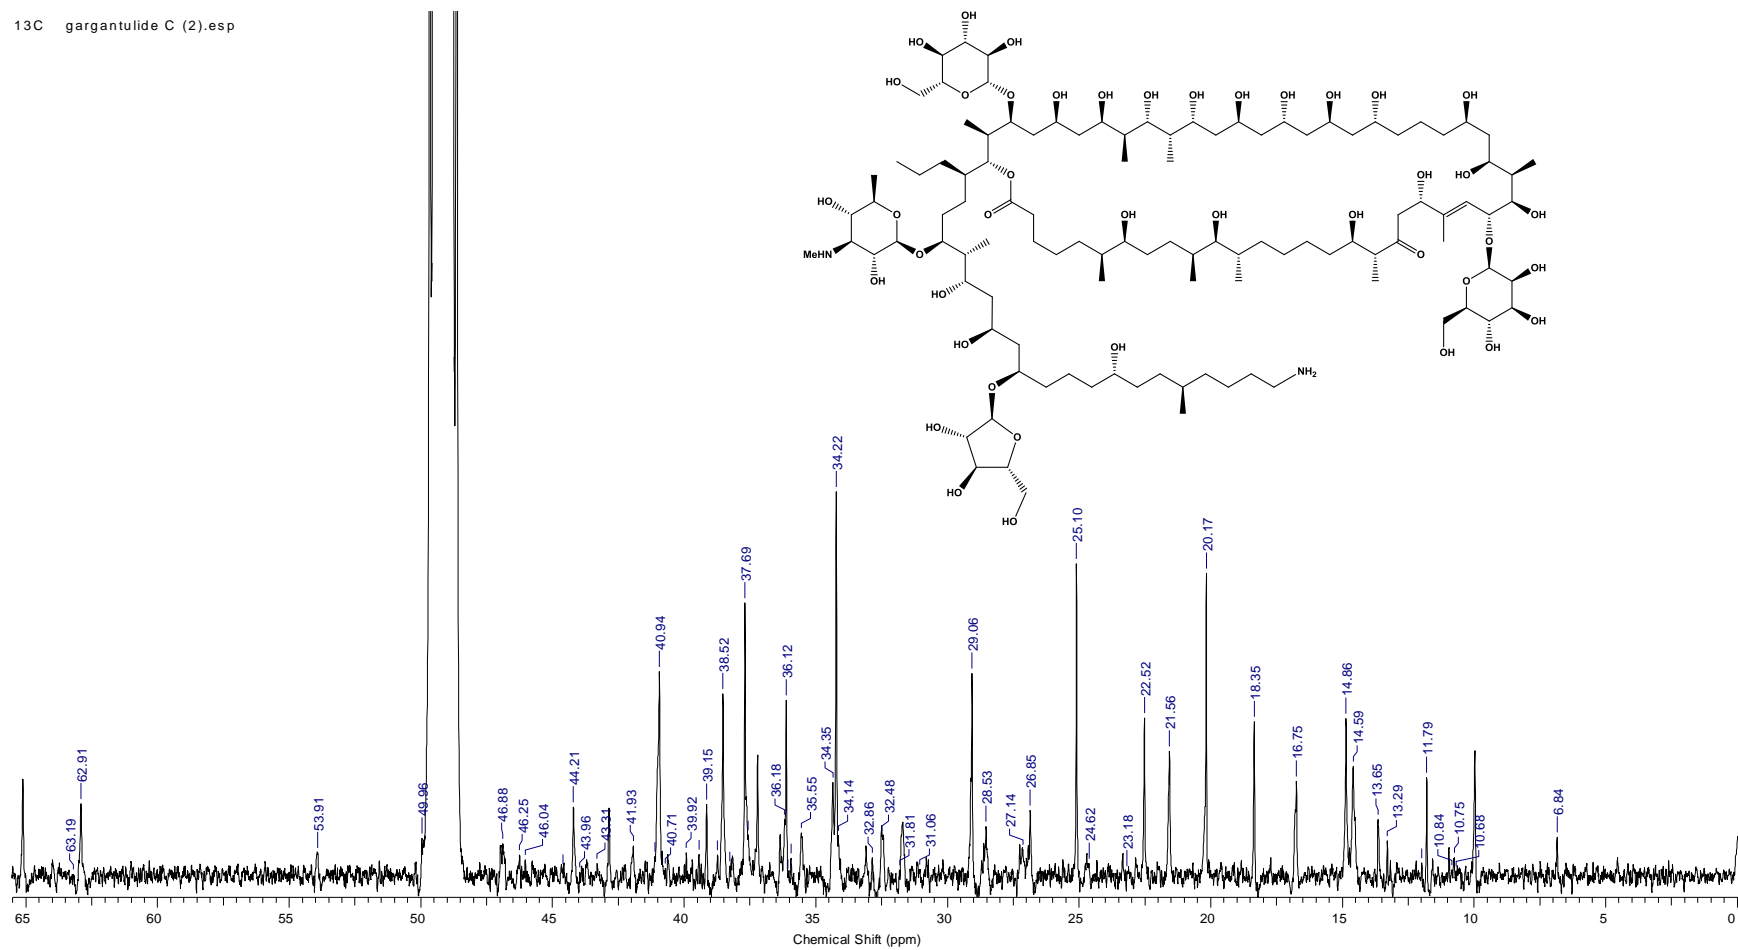

d) <sup>13</sup>C NMR spectrum (CD<sub>3</sub>OD, 125 MHz) of **2**. Expansion between 0 and 65 ppm

13C gargantulide C (2).esp

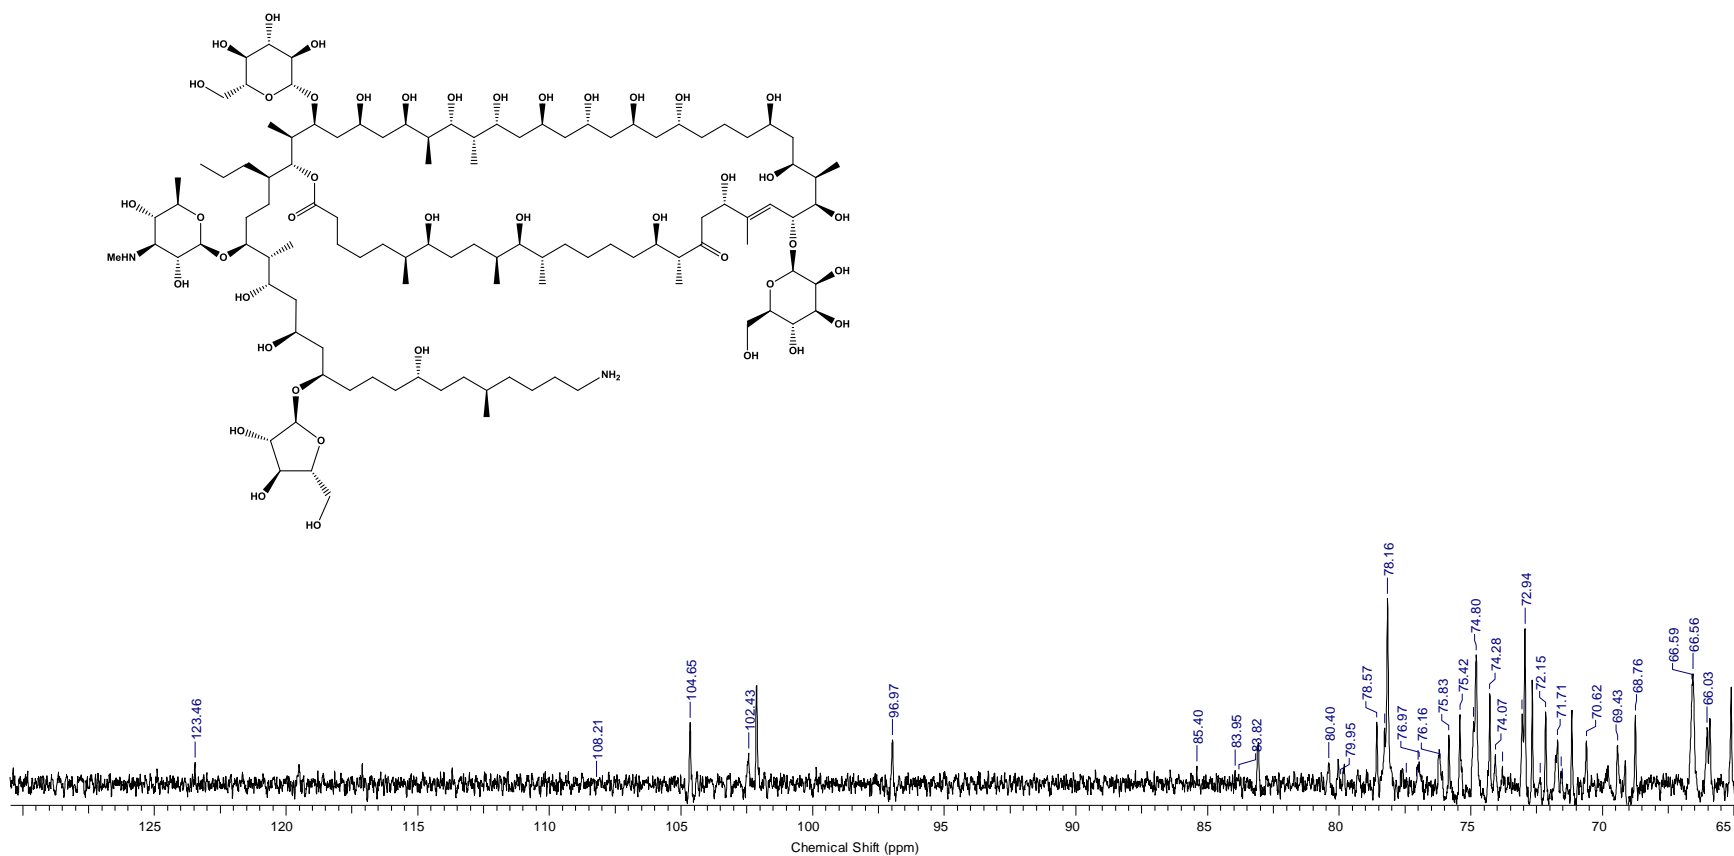

e) <sup>13</sup>C NMR spectrum (CD<sub>3</sub>OD, 125 MHz) of 2. Expansion between 65 and 130 ppm



COSY gargantulide C (2).esp

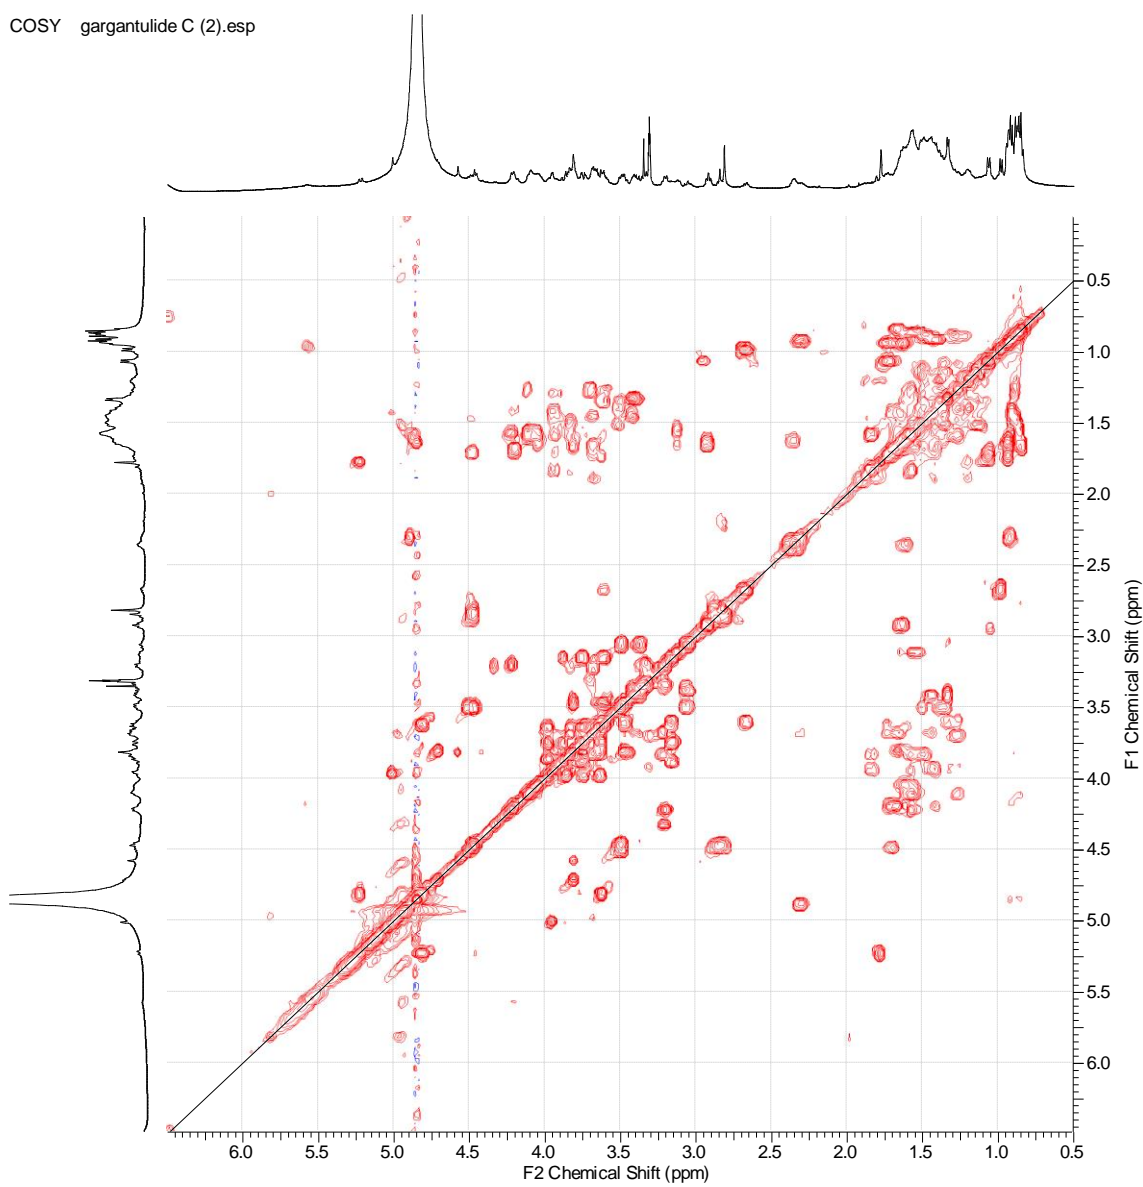

f) COSY spectrum of **2**

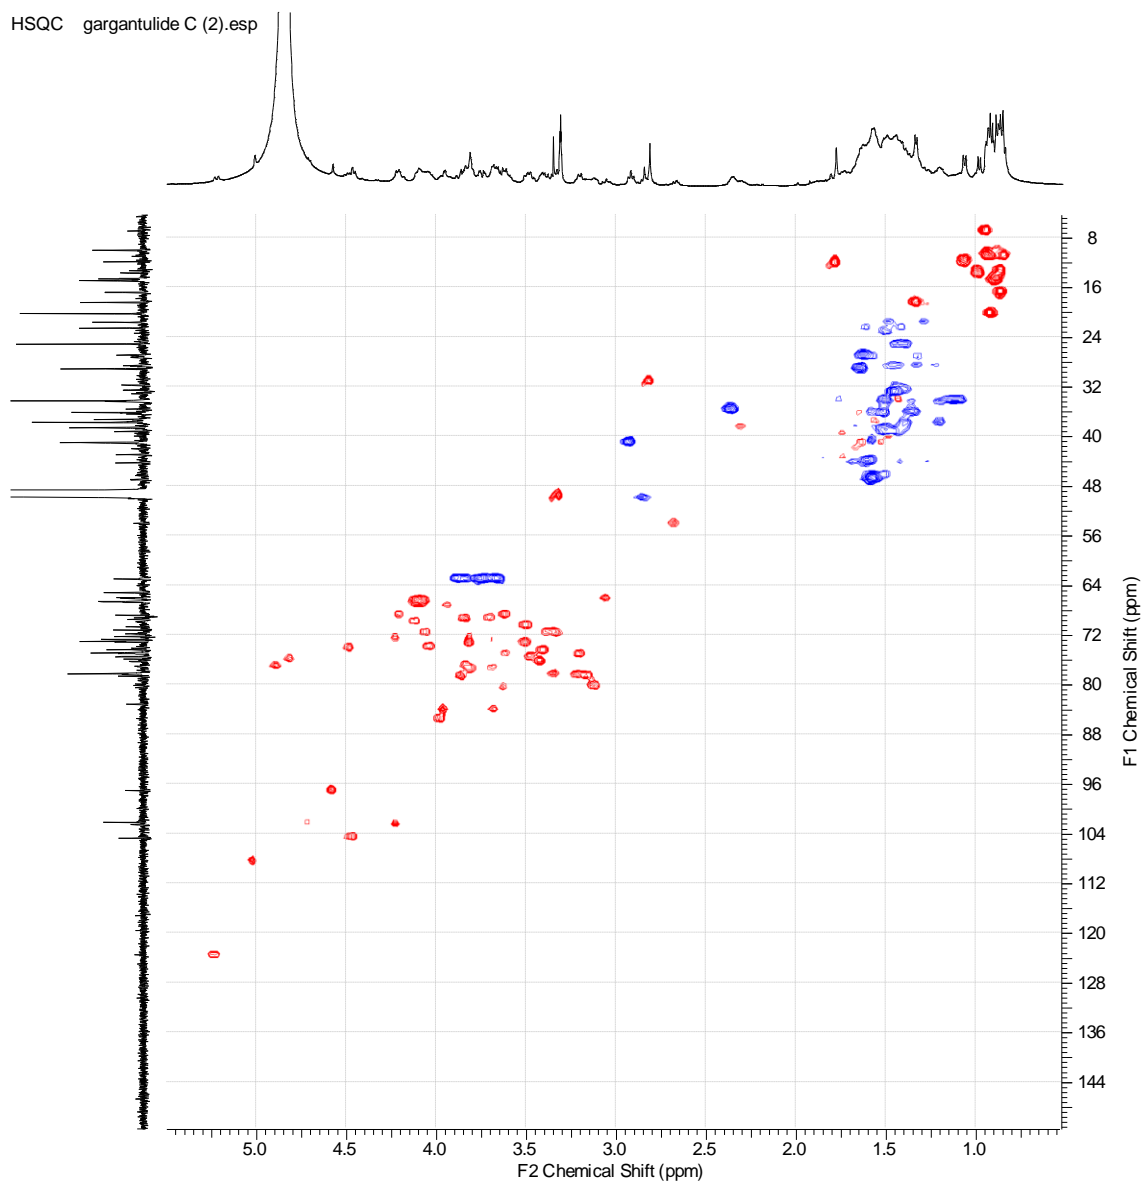

g) HSQC spectrum of **2**

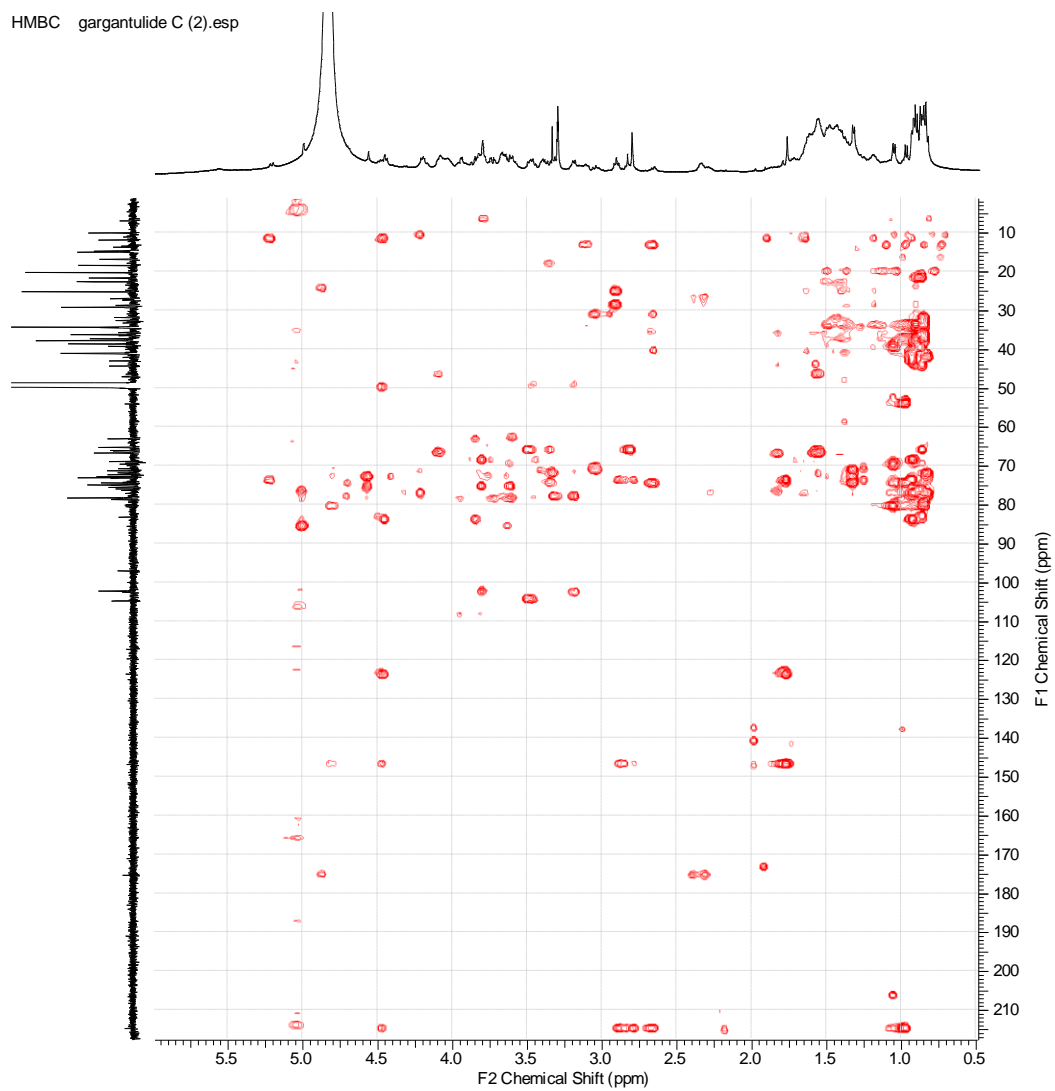

h) HMBC spectrum of **2**

TOCSY gargantulide C (2).esp

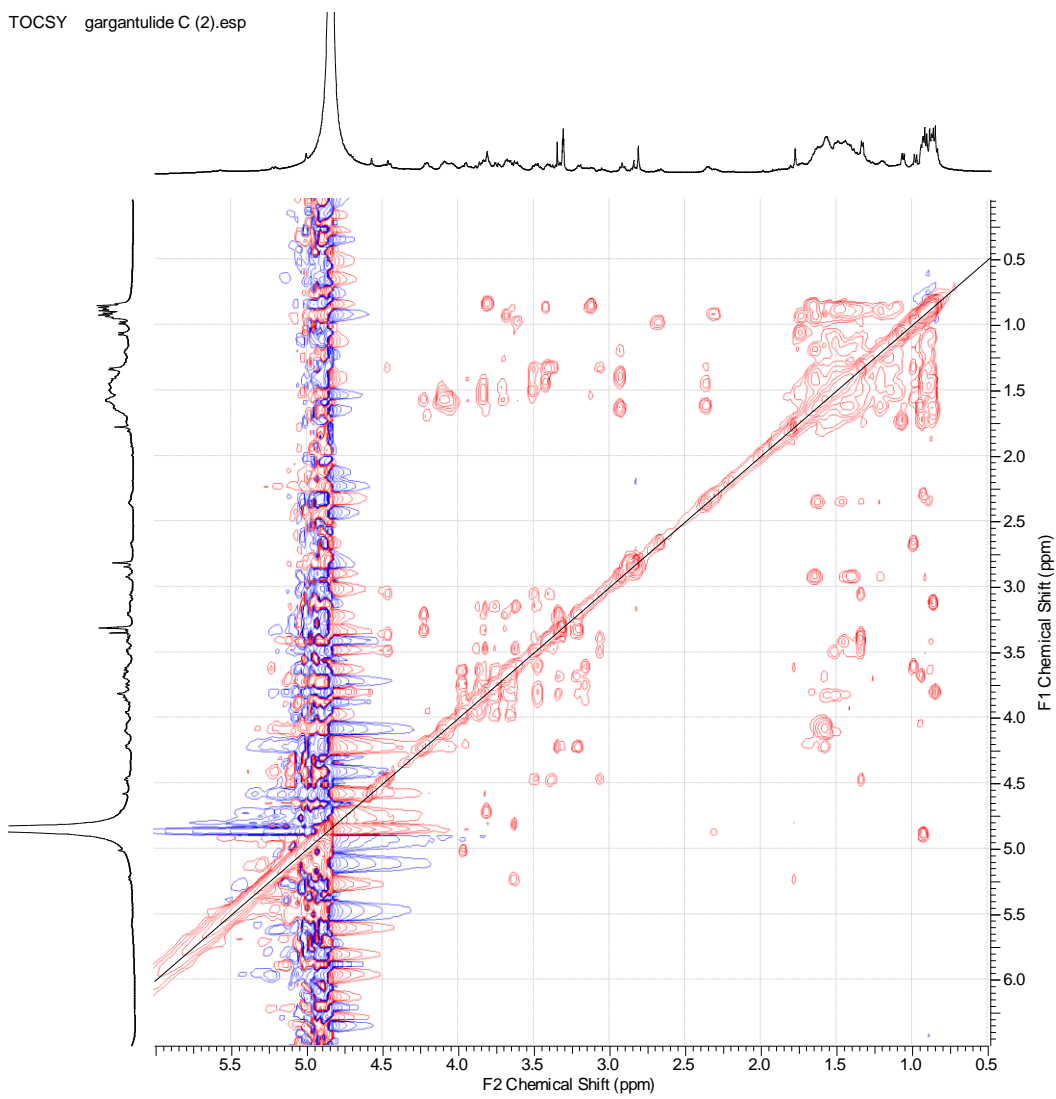

i) TOCSY spectrum of **2**

NOESY gargantulide C (2).esp

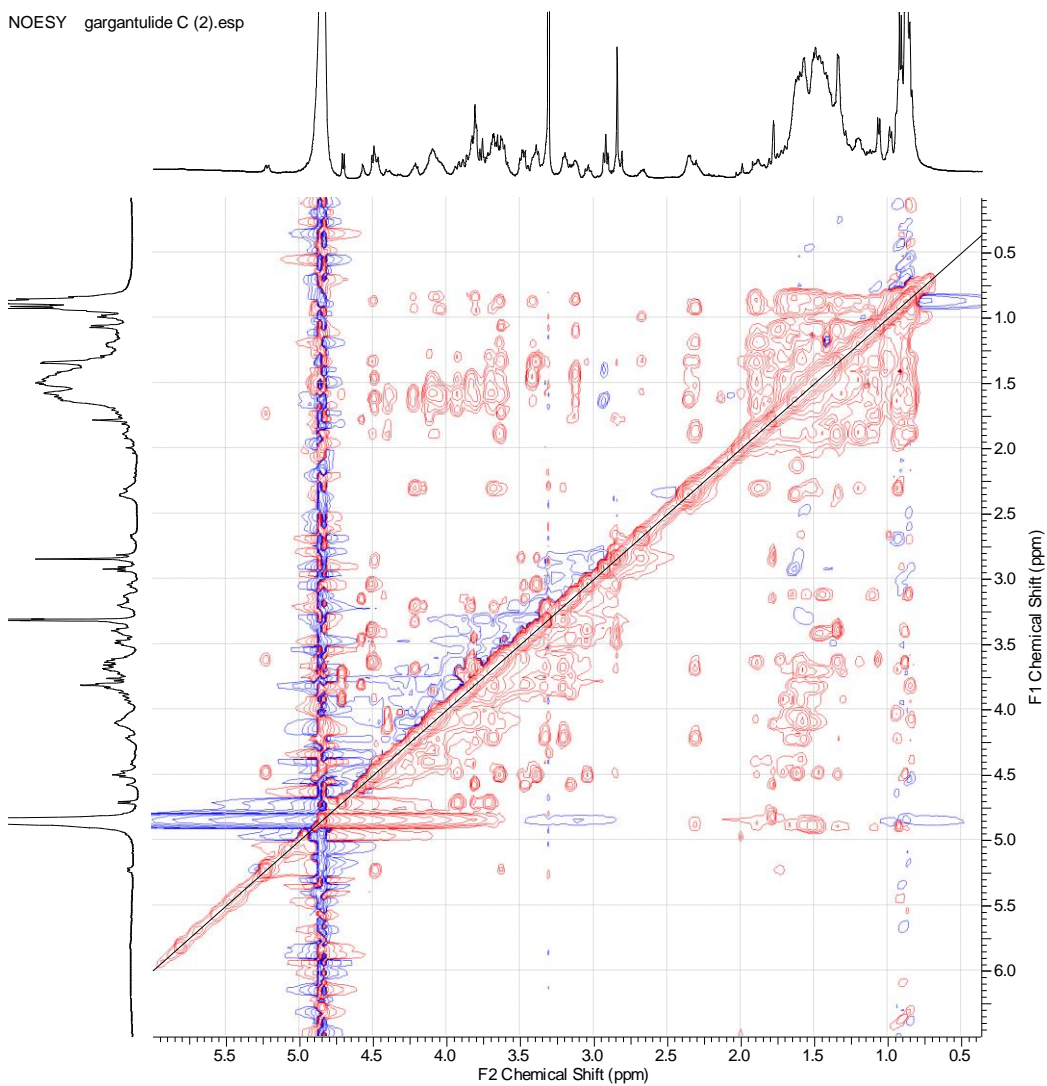

j) NOESY spectrum of **2**

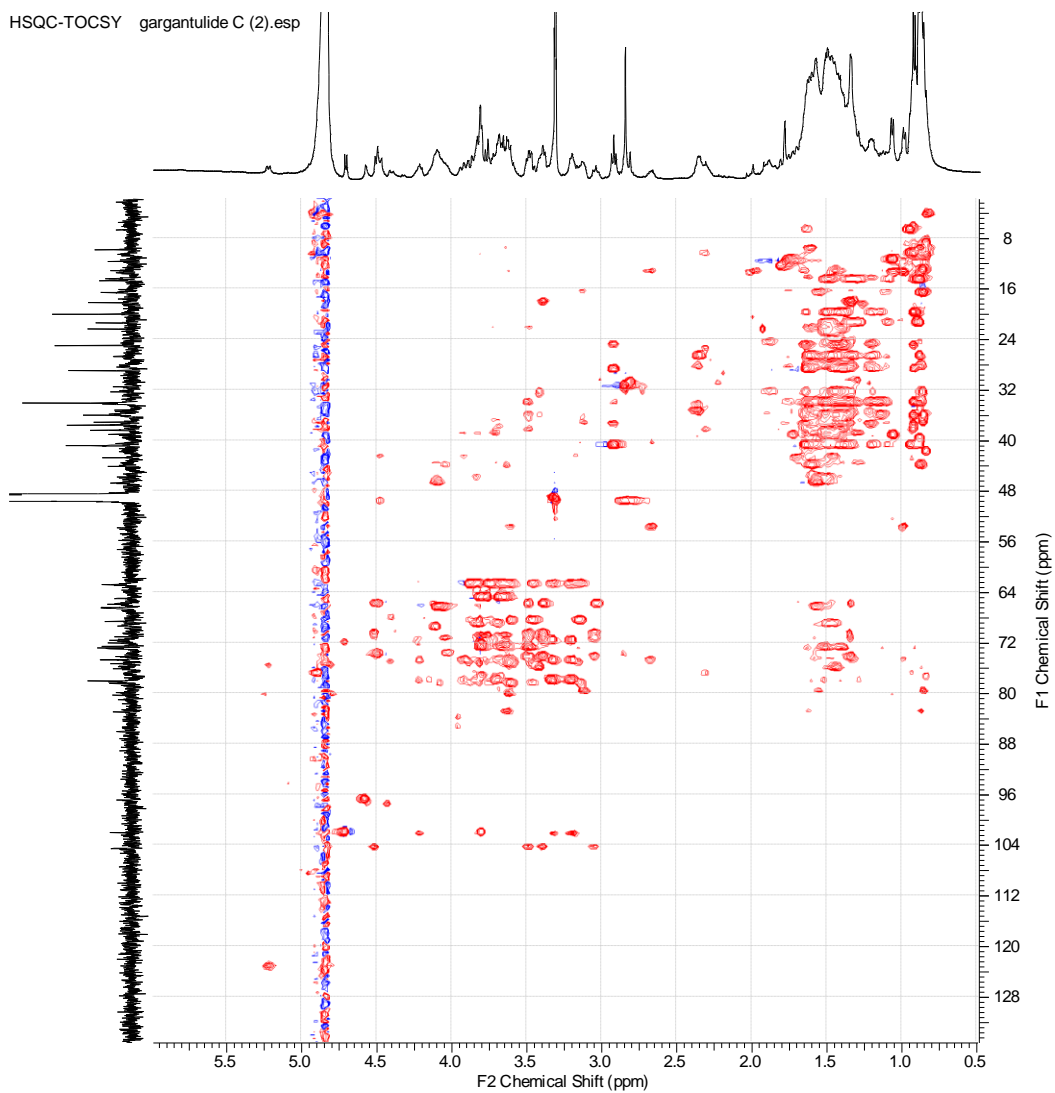

k) HSQC-TOCSY spectrum of **2**

JRES gargantulide C (2).esp

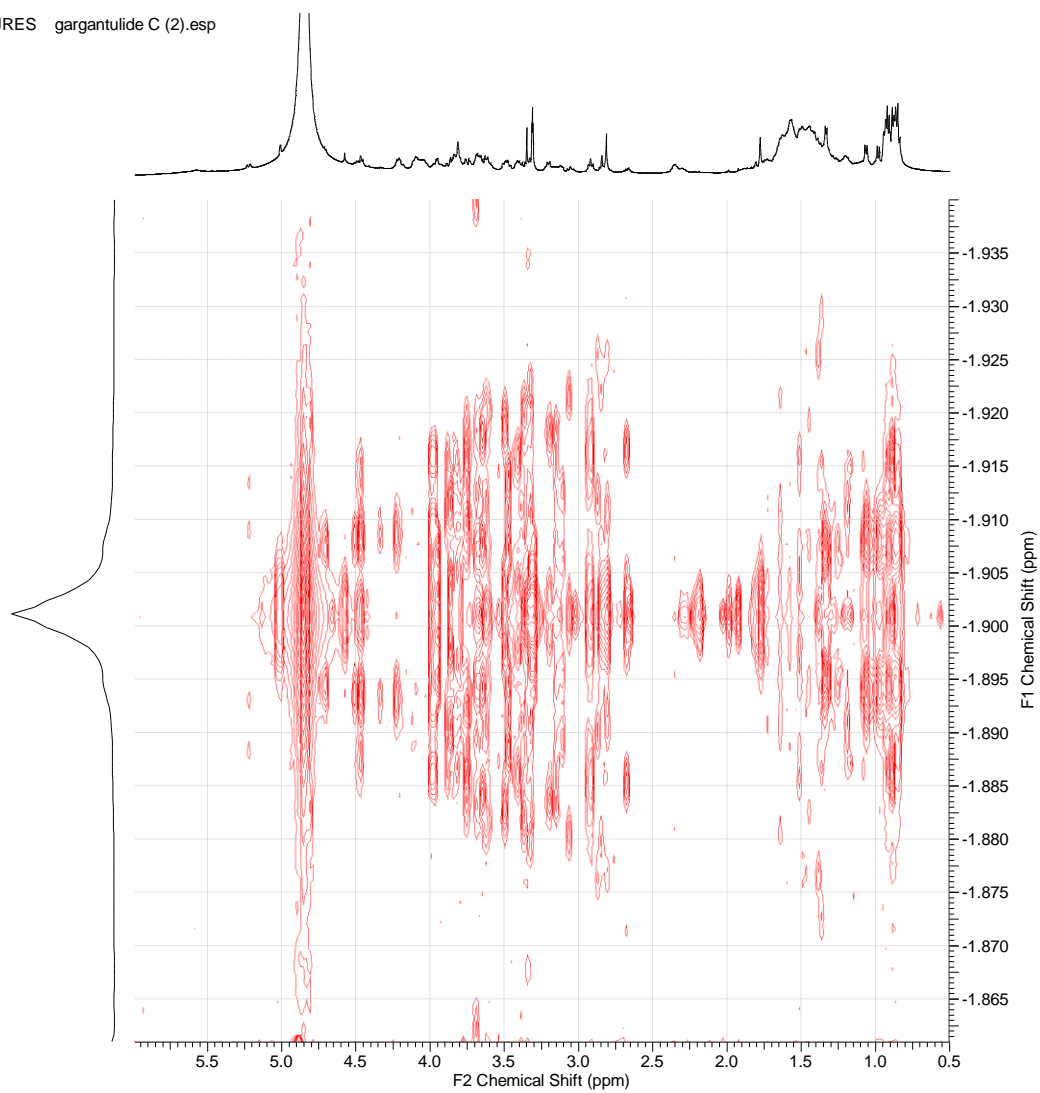

l) JRES spectrum of **2**

Figure S6. Key COSY, TOCSY, HSQC-TOCSY and HMBC correlations observed for **2**

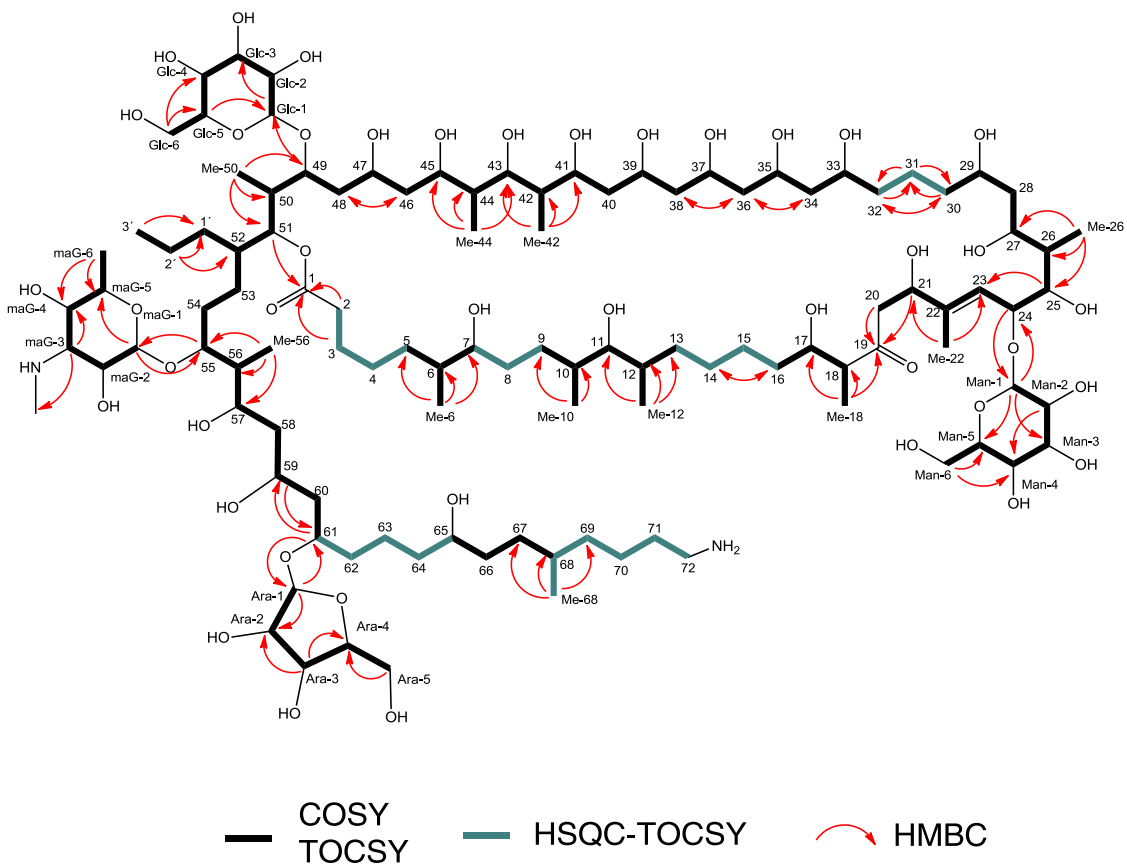



**Figure S7.** LC-HRMS co-detection of gargantulides A (**3**), B (**1**) and C (**2**) in the acetone crude extract of a micro-scale fermentation. (UV 210 nm: pink trace; MS+: blue trace) HRESIMS(+)-TOF spectra (ISCID 0 eV) of gargantulides A (triply and doubly-charged adducts) B and C (doubly-charged ions)

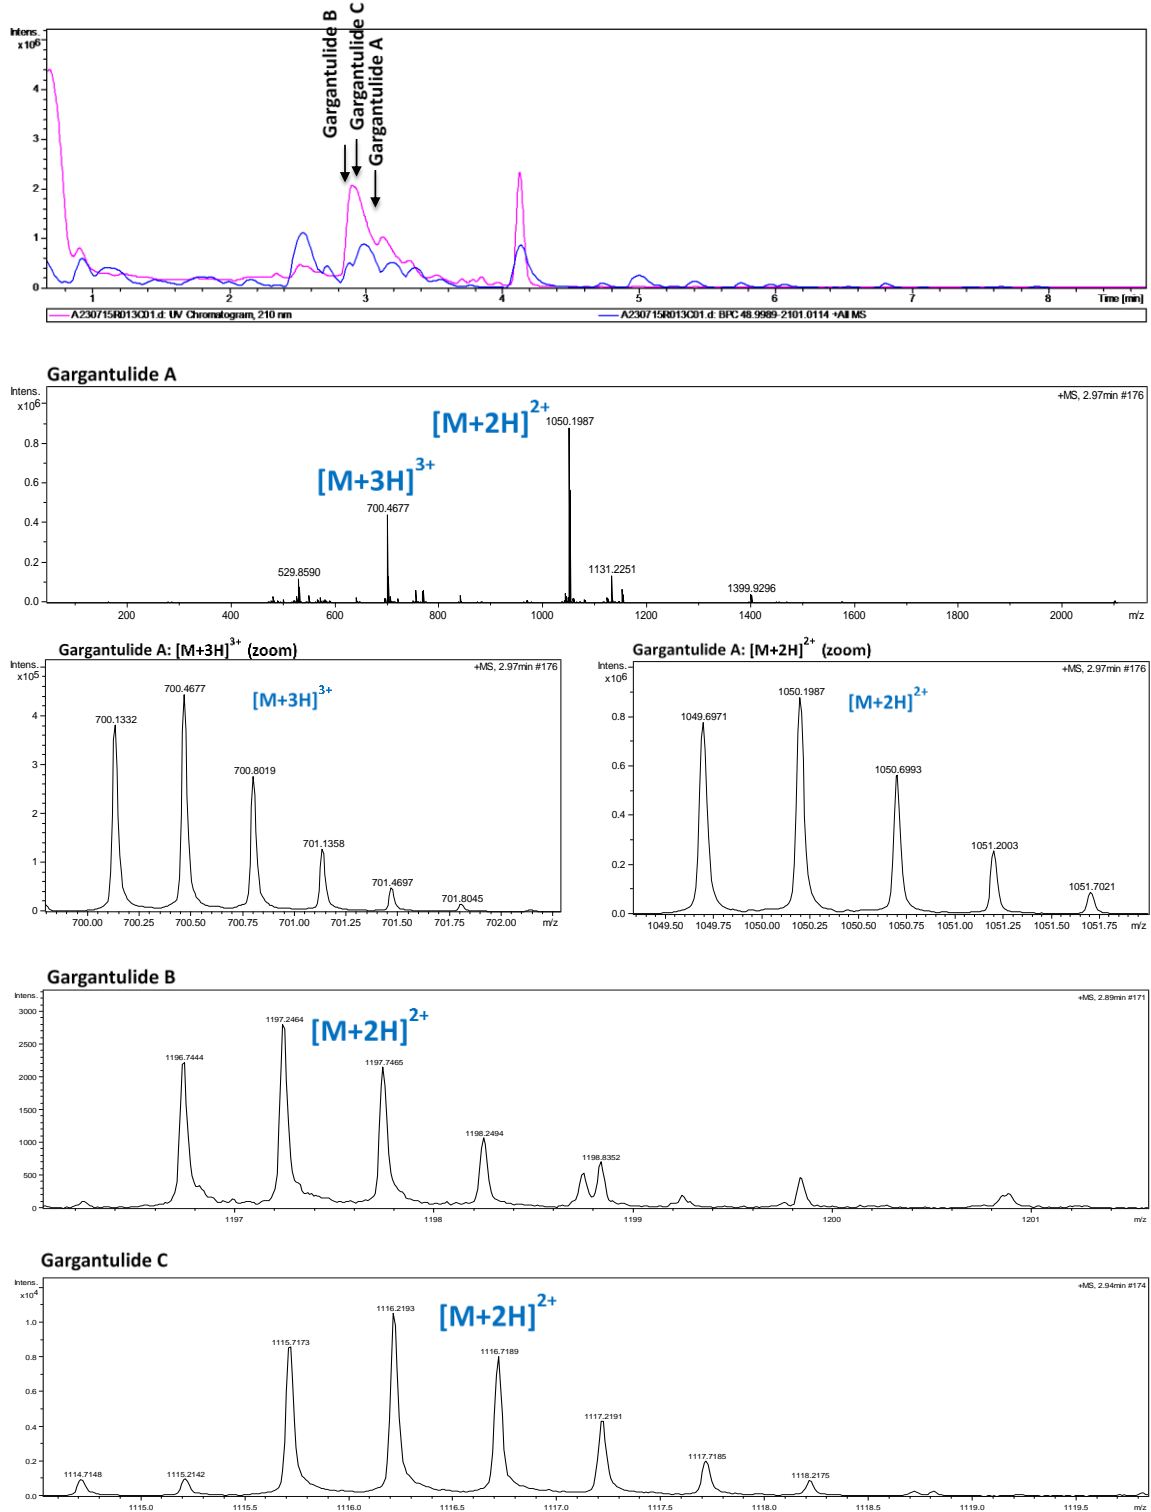

**Table S2.** antiSMASH results (bacterial version, relaxed mode). All types of BGCs are listed as detected by antiSMASH

| Region number | Type                                              | Approx. size, kbp | Most similar known cluster                                   | Remarks                                             |
|---------------|---------------------------------------------------|-------------------|--------------------------------------------------------------|-----------------------------------------------------|
| 1             | PKS-like                                          | 40,855            | No hits                                                      |                                                     |
| 2             | NRPS                                              | 44,211            | Daptomycin (4%)                                              |                                                     |
| 3             | Siderophore                                       | 11,832            | Macrotetrolide (33%)                                         |                                                     |
| 4             | RIPP-like                                         | 9,971             | Enduracidin (4%)                                             |                                                     |
| 5             | LAP, thiopeptide                                  | 27,977            | No hits                                                      |                                                     |
| 6             | Terpene                                           | 21,678            | Geosmin (100%)                                               |                                                     |
| 7             | NRPS-like, terpene                                | 42,088            | Isorenieratene (42%)                                         | Possibly two clusters                               |
| 8             | T1PKS                                             | 45,457            | EDHA (33%)                                                   |                                                     |
| 9             | Terpene                                           | 19,827            | Lipopetide 8D1-1 (6%)                                        |                                                     |
| 10            | T1PKS                                             | 45,036            | Sch-47554/Sch-47555 (3%)                                     |                                                     |
| 11            | T1PKS, oligosaccharide                            | 216,516           | Funisamine (30%)                                             | Putative cluster, coding for gargantulide compounds |
| 12            | LAP, ladderane, thioamide-NRP, NRPS               | 76,620            | Ishigamide (72%)                                             | Possibly several clusters                           |
| 13            | Other, thiopeptide, terpene, lantipeptide clas II | 72,243            | 2-methylisoborneol (100%)                                    |                                                     |
| 14            | NAPAA                                             | 31,640            | Himastatin (8%)                                              |                                                     |
| 15            | NRPS                                              | 62,803            | Albachelin (70%)                                             |                                                     |
| 16            | CDPS                                              | 20,683            | No hits                                                      |                                                     |
| 17            | PKS-like                                          | 40,596            | No hits                                                      |                                                     |
| 18            | Lantipeptide class I                              | 25,334            | No hits                                                      |                                                     |
| 19            | Lantipeptide class III                            | 22,579            | Ery-9 / Ery-6 / Ery-8 / Ery-7 / Ery-5 / Ery-4 / Ery-3 (100%) |                                                     |
| 20            | Arylpolyene                                       | 40,340            | Ibomycin (5%)                                                |                                                     |
| 21            | Ectoine                                           | 8,532             | Ectoine (100%)                                               |                                                     |
| 22            | NRPS, T1PKS                                       | 73,041            | Ecumicin (10%)                                               |                                                     |
| 23            | thiopeptide, LAP                                  | 30,258            | No hits                                                      |                                                     |

|    |                                                                     |         |                                            |                           |
|----|---------------------------------------------------------------------|---------|--------------------------------------------|---------------------------|
| 24 | redox-cofactor                                                      | 22,025  | Lankacidin C (20%)                         |                           |
| 25 | cyanobactin, PKS-like, NRPS, T1PKS, lantipeptide class V, linaridin | 85,858  | prenylagaramide B / prenylagaramide C (8%) |                           |
| 26 | Lantipeptide class V                                                | 40,587  | Arginomycin (13%)                          |                           |
| 27 | Linaridin                                                           | 20,557  | Legonaridin (25%)                          |                           |
| 28 | Lantipeptide class V                                                | 41,924  | Ashimides (8%)                             |                           |
| 29 | Lantipeptide class II                                               | 23,053  | No hits                                    |                           |
| 30 | NAPAA                                                               | 32,569  | No hits                                    |                           |
| 31 | hgIE-KS, T1PKS                                                      | 49,901  | Rifamorpholine A/B/C/D/E (4%)              |                           |
| 32 | NRPS                                                                | 57,957  | Telomycin (5%)                             |                           |
| 33 | NRPS, ectoine, T1PKS                                                | 80,296  | Kosinostatin (16%)                         |                           |
| 34 | NRPS, NRPS-like                                                     | 74,191  | WS9326 (10%)                               |                           |
| 35 | NAPAA                                                               | 32,384  | No hits                                    |                           |
| 36 | Terpene                                                             | 21,115  | SF2575 (6%)                                |                           |
| 37 | Ladderane, NRPS, T1PKS                                              | 173,101 | Spiramycin (22%)                           | Possibly three clusters   |
| 38 | NRPS, arylpolyene                                                   | 130,298 | Kedarcidin (14%)                           |                           |
| 39 | T1PKS                                                               | 67,639  | Meilingmycin (5%)                          |                           |
| 40 | Lassoptide                                                          | 24,502  | No hits                                    |                           |
| 41 | ladderane, NRPS, NRPS-like, transAT-PKS, T1PKS, NAPAA               | 245,836 | Incednine (13%)                            | Possibly several clusters |
| 42 | NRPS, RIPP-like                                                     | 49,672  | Capreomycin IA/IB (6%)                     |                           |
| 43 | Furan                                                               | 20,998  | No hits                                    |                           |
| 44 | NRPS, thioamitides                                                  | 80,729  | Mannopectimycin (44%)                      |                           |
| 45 | Betalactone                                                         | 25,210  | No hits                                    |                           |

**Table S3.** Putative functions of genes in *gar* BGC

| Protein<br>(NCBI accession)   | a.a. | Proposed function                                              | BLAST hit protein                                                                        | Query coverage/Per. identity/ E value | Accession number of BLAST hit |
|-------------------------------|------|----------------------------------------------------------------|------------------------------------------------------------------------------------------|---------------------------------------|-------------------------------|
| <b>GarR1</b><br>(HUW46_01962) | 938  | Putative MalT family HTH-containing regulator                  | Helix-turn-helix transcriptional regulator ( <i>Kutzneria albida</i> )                   | 99% / 49.58% / 0.0                    | WP_025354824.1                |
| <b>GarR2</b><br>(HUW46_01961) | 414  | Putative sensor histidine kinase                               | Sensor histidine kinase ( <i>Asanoa ferruginea</i> )                                     | 95% / 51.23% / 3e-110                 | WP_116067603.1                |
| <b>GarT1</b><br>(HUW46_01960) | 240  | Putative ABC-type multidrug transport system, ATPase component | ATP-binding cassette domain-containing protein ( <i>Micromonospora pattaolongensis</i> ) | 96% / 51.95% / 1e-62                  | WP_091558576.1                |
| <b>GarA</b><br>(HUW46_01959)  | 467  | Acyl-CoA ligase                                                | Acyl-CoA ligase ( <i>Kibdelosporangium aridum</i> )                                      | 99% / 73.18% / 0.0                    | WP_084424151.1                |
| <b>Orf1</b><br>(HUW46_01958)  | 180  | PH domain-containing protein                                   | PH domain-containing protein (Pseudonocardia bacterium)                                  | 91% / 59.76% / 3e-56                  | MPZ66135.1                    |
| <b>Orf2</b><br>(HUW46_01957)  | 524  | PH domain-containing protein                                   | PH domain-containing protein ( <i>Kutzneria albida</i> )                                 | 95% / 52.08 / 6e-169                  | WP_025356057.1                |
| <b>GarR3</b><br>(HUW46_01956) | 228  | TetR family transcriptional regulator                          | TetR/AcrR family transcriptional regulator [ <i>Kutzneria albida</i> ]                   | 81% / 48.92% / 4e-55                  | WP_025359812.1                |
| <b>GarT2</b><br>(HUW46_01955) | 615  | Putative ABC-type multidrug transport system, ATPase component | ATP-binding cassette domain-containing protein [ <i>Amycolatopsis</i> sp. EGI 650086]    | 95% / 63.27 / 0.0                     | WP_158888982.1                |
| <b>GarG1</b><br>(HUW46_01954) | 396  | Putative glycosyltransferase of MGT family                     | glycosyltransferase MGT family protein [ <i>Mycolicibacterium thermoresistibile</i> ]    | 98% / 57.11% / 6e-142                 | WP_003926533.1                |
| <b>Orf3</b><br>(HUW46_01953)  | 84   | Hypothetical protein                                           | hypothetical protein [ <i>Scissionella</i> sp. SE31]                                     | 91% / 53.25% / 7e-17                  | WP_031470089.1                |
| <b>GarG2</b><br>(HUW46_01952) | 457  | Putative glycosyltransferase of MGT family                     | glycosyltransferase family 1 protein [ <i>Amycolatopsis</i> sp. SID8362]                 | 92% / 43.88% / 5e-115                 | WP_160698909.1                |

|                                 |      |                                            |                                                                      |                       |                |
|---------------------------------|------|--------------------------------------------|----------------------------------------------------------------------|-----------------------|----------------|
| <b>GarG3<br/>(HUW46_01951)</b>  | 421  | Putative glycosyltransferase of MGT family | glycosyltransferase family 1 protein [ <i>Allokutzneria albata</i> ] | 97% / 46.12% / 1e-115 | WP_030432743.1 |
| <b>GarG4<br/>(HUW46_01950)</b>  | 419  | Putative glycosyltransferase of MGT family | glycosyltransferase family 1 protein [ <i>Allokutzneria albata</i> ] | 98% / 43.06% / 1e-104 | WP_030432743.1 |
| <b>GarP1<br/>(HUW46_01949)</b>  | 4568 | Modular polyketide synthase                | type I polyketide synthase [ <i>Actinophytocola oryzae</i> ]         | 97% / 55.09% / 0.0    | WP_133901401.1 |
| <b>GarP2<br/>(HUW46_01948)</b>  | 9791 | Modular polyketide synthase                | modular polyketide synthase [ <i>Streptomyces</i> sp. RK95-74]       | 96% / 56.64% / 0.0    | BAW35608.1     |
| <b>GarP3<br/>(HUW46_01947)</b>  | 5411 | Modular polyketide synthase                | PKS I [ <i>Kutzneria albida</i> DSM 43870]                           | 99% / 56.34% / 0.0    | AHH99926.1     |
| <b>GarP4<br/>(HUW46_01946)</b>  | 6168 | Modular polyketide synthase                | type I polyketide synthase [ <i>Streptomyces</i> sp. LamerLS-31b]    | 98% / 55.92% / 0.0    | WP_093893008.1 |
| <b>GarP5<br/>(HUW46_01945)</b>  | 8075 | Modular polyketide synthase                | beta-ketoacyl synthase [ <i>Streptomyces hygrosopicus</i> ]          | 99% / 54.13% / 0.0    | AQW47576.1     |
| <b>GarP6<br/>(HUW46_01944)</b>  | 4542 | Modular polyketide synthase                | type I polyketide synthase [ <i>Streptomyces cinnamoneus</i> ]       | 99% / 62.72% / 0.0    | WP_099199035.1 |
| <b>GarP7<br/>(HUW46_01943)</b>  | 5347 | Modular polyketide synthase                | type I polyketide synthase [ <i>Amycolatopsis orientalis</i> ]       | 100% / 54.65% / 0.0   | WP_051173827.1 |
| <b>GarP8<br/>(HUW46_01942)</b>  | 3617 | Modular polyketide synthase                | type I polyketide synthase [ <i>Streptomyces cinnamoneus</i> ]       | 99% / 59.56% / 0.0    | WP_099199033.1 |
| <b>GarP9<br/>(HUW46_01941)</b>  | 5662 | Modular polyketide synthase                | PKS I [ <i>Kutzneria albida</i> DSM 43870]                           | 99% / 58.65% / 0.0    | AHH99926.1     |
| <b>GarP10<br/>(HUW46_01940)</b> | 5910 | Modular polyketide synthase                | type I polyketide synthase [ <i>Streptomyces cinnamoneus</i> ]       | 95% / 61.75% / 0.0    | WP_104650952.1 |
| <b>GarB<br/>(HUW46_01939)</b>   | 314  | AT domain containing protein               | ACP S-malonyltransferase [unclassified <i>Kitasatospora</i> ]        | 96% / 53.77% / 5e-111 | WP_057230119.1 |
| <b>GarC<br/>(HUW46_01938)</b>   | 421  | Putative cytochrome p450                   | cytochrome P450 [ <i>Streptomyces cinnamoneus</i> ]                  | 99% / 56.87 / 1e-165  | WP_099199030.1 |
| <b>GarR4<br/>(HUW46_01937)</b>  | 222  | Putative response regulator                | response regulator [Propionibacteriales bacterium]                   | 92% / 69.42% / 1e-94  | MPZ63410.1     |
| <b>GarR5<br/>(HUW46_01936)</b>  | 452  | Sensor histidine kinase                    | sensor histidine kinase [Propionibacteriales bacterium]              | 87% / 51.87% / 1e-103 | MPZ96507.1     |

|                               |     |                                                     |                                                                                                                |                       |                |
|-------------------------------|-----|-----------------------------------------------------|----------------------------------------------------------------------------------------------------------------|-----------------------|----------------|
| <b>GarD</b><br>(HUW46_01935)  | 156 | Putative TDP-4-keto-6-deoxy-D-glucose 3,4-isomerase | WxcM-like domain-containing protein<br>[ <i>Amycolatopsis antarctica</i> ]                                     | 88% / 74.64% / 4e-71  | WP_094863117.1 |
| <b>GarE</b><br>(HUW46_01934)  | 367 | Putative aminotransferase                           | DegT/DnrJ/EryC1/StrS family aminotransferase<br>[ <i>Actinoalloteichus</i> ]                                   | 100% / 68.39% / 0.0   | WP_075741202.1 |
| <b>GarG5</b><br>(HUW46_01933) | 513 | Putative glycosyltransferase                        | glycosyltransferase, family 39 [ <i>Streptomyces cinnamoneus</i> ]                                             | 100% / 60.23% / 0.0   | WP_099199029.1 |
| <b>GarF</b><br>(HUW46_01932)  | 450 | Putative crotonyl-CoA reductase                     | crotonyl-CoA carboxylase/reductase<br>[ <i>Actinomadura macra</i> ]                                            | 99% / 79.15% / 0.0    | WP_067467652.1 |
| <b>GarH</b><br>(HUW46_01931)  | 338 | Putative <i>fabH</i>                                | ketoacyl-ACP synthase III<br>[ <i>Micromonospora pisi</i> ]                                                    | 97% / 77.2% / 2e-175  | WP_121159999.1 |
| <b>GarI</b><br>(HUW46_01930)  | 291 | Putative 3-hydroxybutyryl-CoA dehydrogenase         | 3-hydroxybutyryl-CoA dehydrogenase<br>[ <i>Micromonospora pisi</i> ]                                           | 92% / 74.72% / 3e-138 | WP_121160000.1 |
| <b>GarR6</b><br>(HUW46_01929) | 956 | Putative HTH transcriptional regulator              | helix-turn-helix transcriptional regulator<br>[ <i>Kutzneria albida</i> ]                                      | 97% / 49.89% / 0.0    | WP_025354824.1 |
| <b>Orf4</b><br>(HUW46_01928)  | 369 | Putative IS4-like element                           | IS4-like element ISMfl1 family transposase<br>[ <i>Mycobacteriaceae</i> ]                                      | 98% / 36.22% / 3e-52  | WP_011891513.1 |
| <b>Orf5</b><br>(HUW46_01927)  | 73  | Hypothetical protein                                | hypothetical protein<br>[ <i>Streptomyces kasugaensis</i> ]                                                    | 100% / 60.27% /       | WP_131126254.1 |
| <b>GarR7</b><br>(HUW46_01926) | 222 | DNA-binding response regulator                      | DNA-binding response regulator, NarL/FixJ family, contains REC and HTH domains [ <i>Sinosporangium album</i> ] | 98% / 62.39 / 1e-86   | SDG85138.1     |
| <b>Orf6</b><br>(HUW46_01925)  | 370 | Putative IS256 family element                       | IS256 family transposase<br>[ <i>Actinopolymorpha alba</i> ]                                                   | 66% / 30.26% / 5e-36  | WP_040420563.1 |

**Table S4.** Prediction of activity and stereochemistry of AT, KR, ER and DH domains from bioinformatics analysis. Stereochemical outcomes for gargantulides B and C.

| Protein | Module | Substrate of AT domain | KR domain       | DH domain | ER domain | Predicted stereochemistry (Keatinge-Clay) <sup>a</sup> | Predicted stereochemistry (fully assembled linear polyketides) <sup>b</sup> | Stereochemical outcome for gargantulides B and C <sup>c</sup> |
|---------|--------|------------------------|-----------------|-----------|-----------|--------------------------------------------------------|-----------------------------------------------------------------------------|---------------------------------------------------------------|
| GarP1   | 1      | Mmal-CoA               | B1              | Active    | R         | "R" (C-68)                                             | R (C-68)                                                                    | R (C-68)                                                      |
|         | 2      | Mal-CoA                | B1              | Active    | R         | -                                                      | -                                                                           | -                                                             |
| GarP2   | 3      | Mal-CoA                | B1              | -         | -         | "R" (C-65)                                             | S (C-65)                                                                    | S (C-65)                                                      |
|         | 4      | Mal-CoA                | B1              | Active    | S         | -                                                      | -                                                                           | -                                                             |
|         | 5      | Mal-CoA                | B1              | -         | -         | "R" (C-61)                                             | R (C-61)                                                                    | R (C-61)                                                      |
|         | 6      | Mal-CoA                | B1              | -         | -         | "R" (C-59)                                             | R (C-59)                                                                    | S (C-59) <sup>d</sup>                                         |
|         | 7      | Mmal-coA               | A1              | -         | -         | "R,S" (C-56,57)                                        | S,S (C-56,57)                                                               | R,S (C-56,57) <sup>e</sup>                                    |
|         | 8      | Mal-CoA                | B1              | n.d.      | -         | "R" (C-55)                                             | S (C-55)                                                                    | S (C-55)                                                      |
|         | 9      | Pmal-CoA <sup>f</sup>  | B1              | Active    | R         | "R" (C-52)                                             | R (C-52)                                                                    | R (C-52)                                                      |
| GarP3   | 10     | Mmal-CoA               | B1              | -         | -         | "R,R" (C-50,51)                                        | S,R (C-50,51)                                                               | S,R (C-50,51)                                                 |
|         | 11     | Mal-CoA                | B1              | Inactive  | -         | "R" (C-49)                                             | S (C-49)                                                                    | S (C-49)                                                      |
|         | 12     | Mal-CoA                | B1              | -         | -         | "R" (C-47)                                             | R (C-47)                                                                    | S (C-47) <sup>g</sup>                                         |
| GarP4   | 13     | Mmal-CoA               | B2              | -         | -         | "S,R" (C-44,45)                                        | S,R (C-44,45)                                                               | S,R (C-44,45)                                                 |
|         | 14     | Mmal-CoA               | A1              | -         | -         | "R,S" (C-42,43)                                        | S,R (C-42,43)                                                               | S,R (C-42,43)                                                 |
|         | 15     | Mal-CoA                | A1              | -         | -         | "S" (C-41)                                             | R (C-41)                                                                    | R (C-41)                                                      |
|         | 16     | Mal-CoA                | B1              | -         | -         | "R" (C-39)                                             | S (C-39)                                                                    | S (C-39)                                                      |
| GarP5   | 17     | Mal-CoA                | A1              | -         | -         | "S" (C-37)                                             | R (C-37)                                                                    | R (C-37)                                                      |
|         | 18     | Mal-CoA                | B1              | -         | -         | "R" (C-35)                                             | S (C-35)                                                                    | S (C-35)                                                      |
|         | 19     | Mal-CoA                | A1              | -         | -         | "S" (C-33)                                             | R (C-33)                                                                    | R (C-33)                                                      |
|         | 20     | Mal-CoA                | B1              | Active    | S         | -                                                      | -                                                                           | -                                                             |
|         | 21     | Mal-CoA                | B1              | -         | -         | "R" (C-29)                                             | R (C-29)                                                                    | R (C-29)                                                      |
| GarP6   | 22     | Mmal-CoA               | A1              | -         | -         | "R,S" (C-26,27)                                        | S,S (C-26,27)                                                               | R,S (C-26,27) <sup>h</sup>                                    |
|         | 23     | Mal-CoA                | B1              | -         | -         | "R" (C-25)                                             | S (C-25)                                                                    | R (C-25) <sup>h</sup>                                         |
|         | 24     | Mmal-CoA               | B1              | Active    | -         | "E" double bond                                        | E double bond                                                               | E double bond                                                 |
| GarP7   | 25     | Mal-CoA                | B1              | -         | -         | "R" (C-21)                                             | S (C-21)                                                                    | S (C-21)                                                      |
|         | 26     | Mmal-CoA               | C1 <sup>i</sup> | n.d.      | n.d.      | "R" (C-18)                                             | S (C-18)                                                                    | R (C-18) <sup>i</sup>                                         |
|         | 27     | Mal-CoA                | A1              | -         | -         | "S" (C-17)                                             | R (C-17)                                                                    | R (C-17)                                                      |
| GarP8   | 28     | Mal-CoA                | B1              | Active    | S         | -                                                      | -                                                                           | -                                                             |
|         | 29     | Mmal-CoA               | B1              | Active    | S         | "S" (C-12)                                             | S (C-12)                                                                    | S (C-12)                                                      |
| GarP9   | 30     | Mmal-CoA               | A1              | -         | -         | "R,S" (C-10,11)                                        | S,S (C-10,11)                                                               | S,S (C-10,11)                                                 |
|         | 31     | Mal-CoA                | B1              | Active    | S         | -                                                      | -                                                                           | -                                                             |
|         | 32     | Mmal-CoA               | A1              | -         | -         | "R,S" (C-6,7)                                          | S,S (C-6,7)                                                                 | S,S (C-6,7)                                                   |
| GarP10  | 33     | Mal-CoA                | B1              | Active    | S         | -                                                      | -                                                                           | -                                                             |
|         | 34     | Mal-CoA                | B1              | Active    | S         | -                                                      | -                                                                           | -                                                             |

<sup>a</sup> Bioinformatics prediction for each separate module

<sup>b</sup> See Fig SX (fully assembled linear polyketides)

<sup>c</sup> Stereochemistry determined by a combination of NMR and bioinformatics gene cluster analysis for gargantulides B and C (and extrapolated to gargantulide A, revised in this work)

<sup>d</sup> The Cahn-Ingold-Prelog descriptor in gargantulides B and C for C-59 is inverted to *S* due to the glycosylation at C-61

<sup>e</sup> The Cahn-Ingold-Prelog descriptor in gargantulides A-C for C-56 is inverted to *R* due to the glycosylation at C-55

<sup>f</sup> Propyl malonyl-CoA established by NMR analysis

<sup>g</sup> The Cahn-Ingold-Prelog descriptor in gargantulides A-C for C-47 is inverted to *S* due to macrolactone cyclization and glycosylation at C-49.

<sup>h</sup> The Cahn-Ingold-Prelog descriptor in gargantulides A-C for both C-25 and C-26 is inverted to *R* due to the post-PKS hydroxylation at C-24

<sup>i</sup> Redox-inactive, methyl-epimerizing KR; (module 26)

**Figure S8.** Extracted amino acid sequence alignments of AT, KR, DH and ER domains

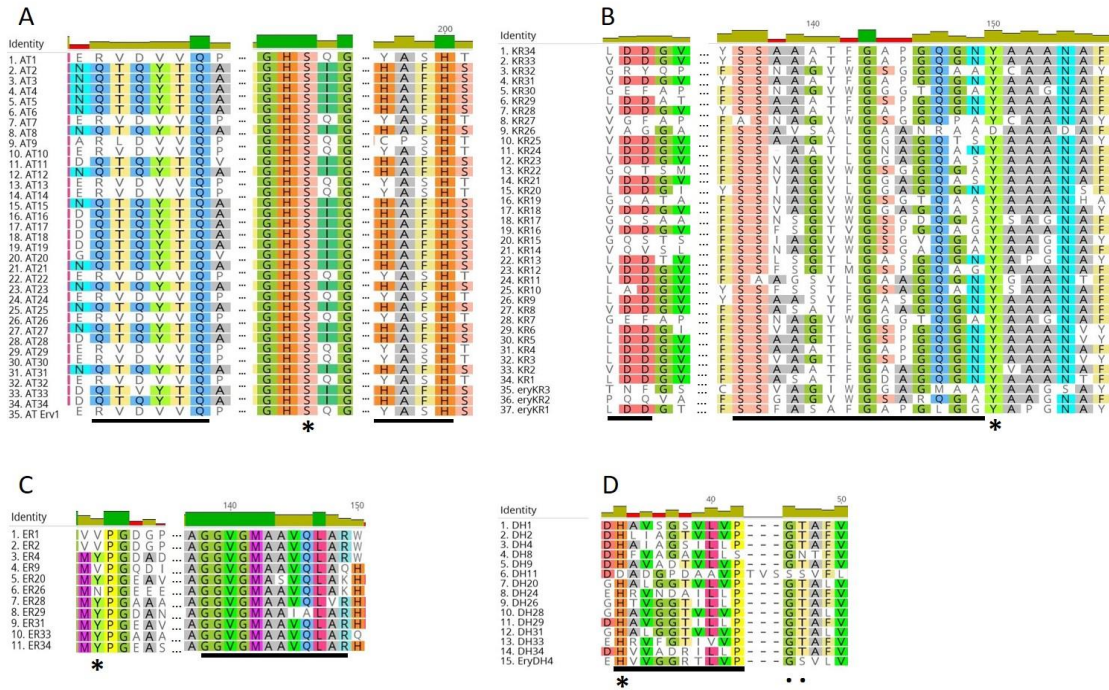

**A** - amino acid sequence alignment of AT domains. Characteristic residues for substrate recognition are underlined with black bars. The catalytic residue is identified with asterisk; **B** - amino acid sequence alignment of KR domains. Two motifs, responsible for determination of A/B/C type of KRs are underlined with black bars; the catalytic tyrosine residue is identified with an asterisk; **C** - amino acid sequence alignment of ER domains. The amino acid related to the stereochemistry of reduced residue is identified with an asterisk. NADPH binding site is identified with a black bar; **D** - amino acid sequence alignment of DH domains. The conserved motif "HXXXGXXXXP" is identified with a black bar. The catalytic residue is identified with an asterisk. Two supporting catalytic residues are identified with filled black spots. The assignment of characteristic residues for substrate recognition and catalytic residues for ATs, KRs, DHs and ERs was done as described in previous works.<sup>3-6</sup>



### Supplementary note: Biosynthesis of amino sugar maG

Within the *gar* BGC, *garD* codes for a protein with high level of similarity (51% identity, 64% similarity) to Tyl1a from the mycaminose biosynthetic pathway in the tylosin BGC,<sup>12,13</sup> suggesting it could function as a TDP-4-keto-6-deoxy-D-glucose 3,4-isomerase. *garE* encodes a PLP-dependent aminotransferase with high homology (62% identity, 73% similarity) to the biochemically characterized aminotransferase TylB from mycaminose biosynthesis.<sup>14</sup> Thus, GarE is proposed to catalyze a C-3 transamination to afford TDP-3-amino-3,6-dideoxy-D-glucose. Surprisingly, the *gar* cluster lacks a gene coding for a putative *N*-methyltransferase to convert TDP-3-amino-3,6-dideoxy-D-glucose into *N*-demethyl-mycaminose (i.e., maG). To look for a candidate gene responsible for the *N*-methylation, we employed the amino acid sequences of some known methyltransferases found in the mycaminose, desosamine, L-ossamine and D-forosamine pathways from different microorganisms. The best candidate was HUW46\_03188, located just outside of the boundaries of the BGC 15, which encodes for a putative S-adenosylmethionine-dependent methyltransferase with high similarity (51% / 65% amino acid identity / similarity) to DesVI, the biochemically characterized *N,N*-dimethyltransferase from desosamine biosynthesis<sup>15</sup> (Table S5). Interestingly, other DesVI homologous proteins, such as TylM1 (tylosin gene cluster) or SpnS (spinosyns BGC), have been shown to catalyze *N*-methylation in a stepwise manner, involving the release of the monomethylated product from the active site.<sup>15,16</sup> This could explain the formation of the monomethylated amino sugar maG in gargantulides A-C. Additionally, genes encoding for a putative glucose-1-phosphate thymidyltransferase and dTDP-glucose 4,6-dehydratase, required in the first two steps to afford the intermediate TDP-4-keto-2,6-dideoxy-D-glucose, are also found elsewhere in the genome (Table S6). Based on these findings, a biosynthetic pathway to maG from glucose-1-phosphate can be proposed (Fig. S9)

**Table S5.** Levels of identity and similarity of the putative *N*-Methyltransferase HUW46\_03188 from CA-230715 with other known *N*-Methyltransferases.

| Protein | Microorganism                     | % Identity to HUW46_03188 | % Similarity to HUW46_03188 |
|---------|-----------------------------------|---------------------------|-----------------------------|
| TyIM1   | <i>Streptomyces fradiae</i>       | 43                        | 61                          |
| DesVI   | <i>Streptomyces venezuelae</i>    | 51                        | 65                          |
| SpnS    | <i>Saccharopolyspora spinosa</i>  | 42                        | 58                          |
| Ossl    | <i>Streptomyces ossamyceticus</i> | 43                        | 59                          |
| Orf1C   | <i>Streptomyces ambofaciens</i>   | 44                        | 62                          |
| Orf9c   | <i>Streptomyces ambofaciens</i>   | 44                        | 57                          |

**Table S6.** Identified genes encoding for putative glucose-1-phosphate thymidyltransferase and dTDP-glucose 4,6-dehydratase in the genome of CA-230715.

| CA-230715 ORF | Protein a. a. | Putative function                       | Best match accession number | % Identity / Similarity |
|---------------|---------------|-----------------------------------------|-----------------------------|-------------------------|
| HUW46_03193   | 293           | glucose-1-phosphate thymidyltransferase | WP_020668504.1              | 87 / 93                 |
| HUW46_02674   | 330           | dTDP-glucose 4,6-dehydratase            | WP_144591396.1              | 88 / 92                 |
| HUW46_09296   | 335           | dTDP-glucose 4,6-dehydratase            | WP_125677294.1              | 72 / 83                 |

**Figure S9.** Proposed biosynthetic pathway for the amino sugar 3,6-deoxy-3-methylamino D-glucose (maG)

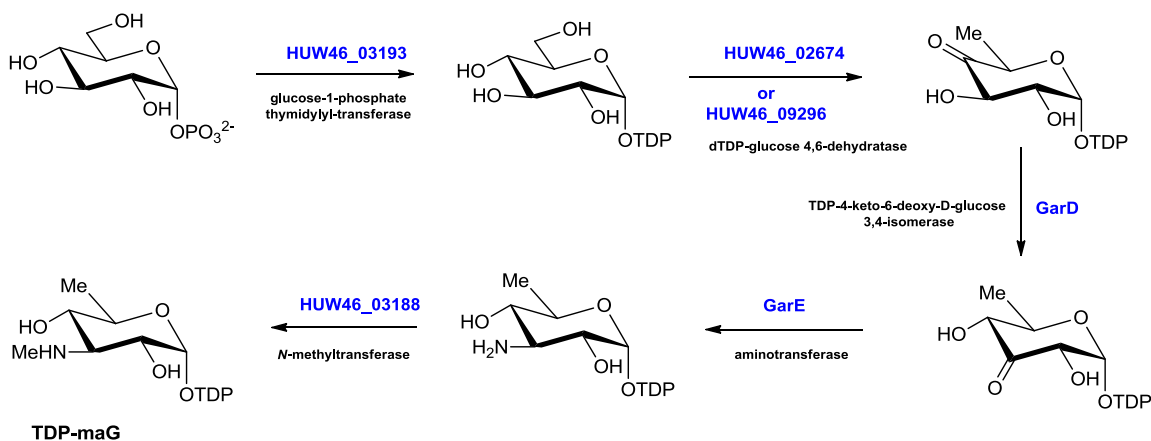

**Figure S10.** Bioinformatics assignments (*gar* BGC analysis) of the absolute configurations for the gargantulides polyketide aglycon (**a**). Comparison with the absolute configurations previously reported for gargantulide A (**b**)<sup>17</sup>

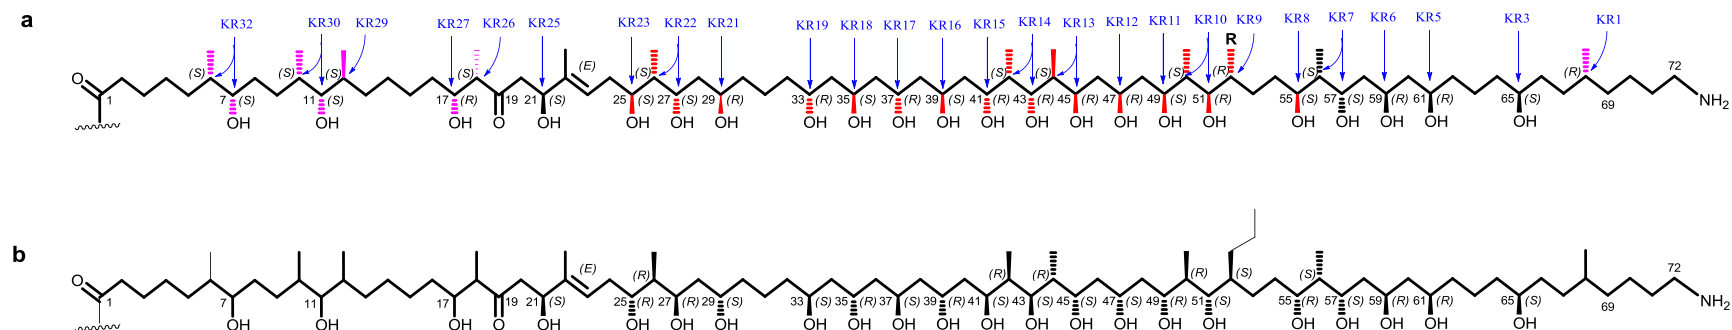

KR domains determining the stereochemical outcome are indicated in blue color. Chiral centers showing disagreement between the *in silico* prediction and the previously reported NMR-based structure for gargantulide A, are highlighted in red color. Undetermined chiral centers for gargantulide A in the original work, which have been now assigned by bioinformatic analysis, are highlighted in pink color.

**Figure S11.** Determination of the relative configuration of the C-55 to C-57 stereocluster for gargantulide B (**1**)

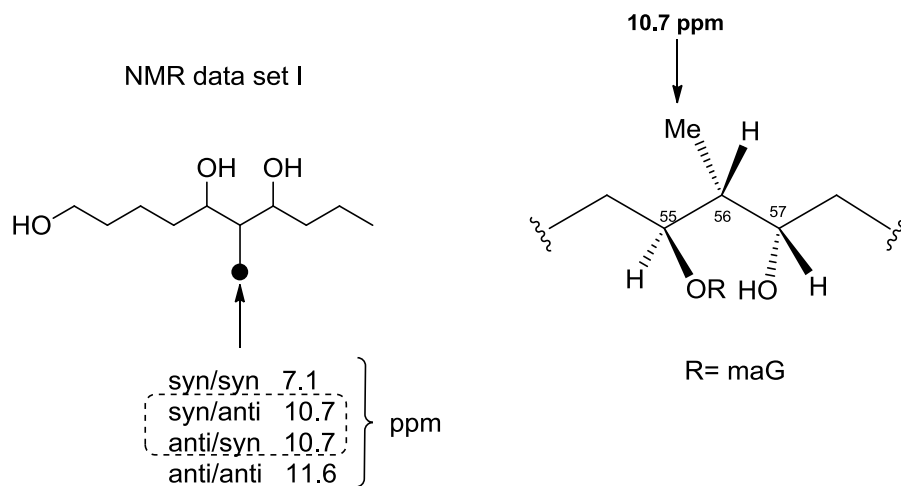

a) Kishi's NMR data set I for 2-methyl-1,3-diols<sup>18</sup> (left) and chemical shift value of Me-56 (right)

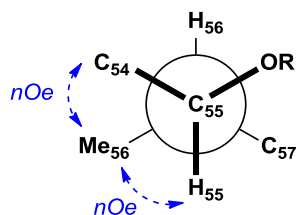

$${}^3J_{H55-H56} = \text{ca. } 9 \text{ Hz}$$

$${}^3J_{C54-H56} = \text{ca. small}$$

$${}^3J_{C57-H55} = \text{ca. small}$$

$${}^3J_{Me56-H55} = \text{ca. small}$$

$${}^2J_{C56-H55} = \text{ca. small}$$

$${}^2J_{C55-H56} = \text{ca. large}$$

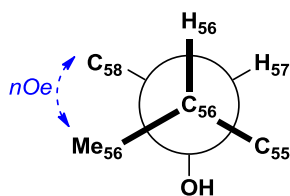

$${}^3J_{H56-H57} = \text{ca. } 2 \text{ Hz}$$

$${}^3J_{C55-H57} = \text{ca. small}$$

$${}^3J_{C58-H56} = \text{ca. small}$$

$${}^3J_{Me56-H57} = \text{ca. large}$$

b) Qualitative  ${}^3J_{C,H}$ -based configuration analysis of the C-55 to C-57 stereocenter. Other  ${}^2J_{C,H}$  constants are classified as “small” or “large” according to Murata’s method.<sup>19</sup> Key NOESY correlations are also indicated (NOESY correlation Me-56/H-58 partially overlapped with other *nOe* cross-peaks).

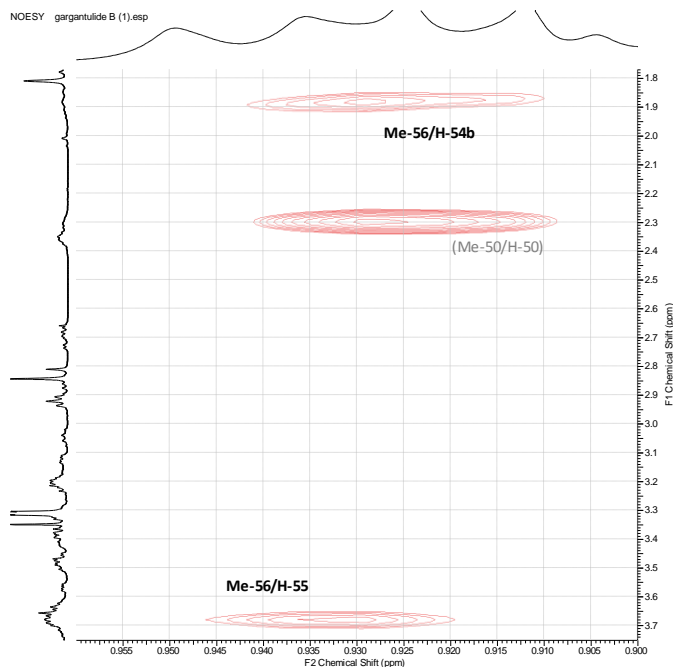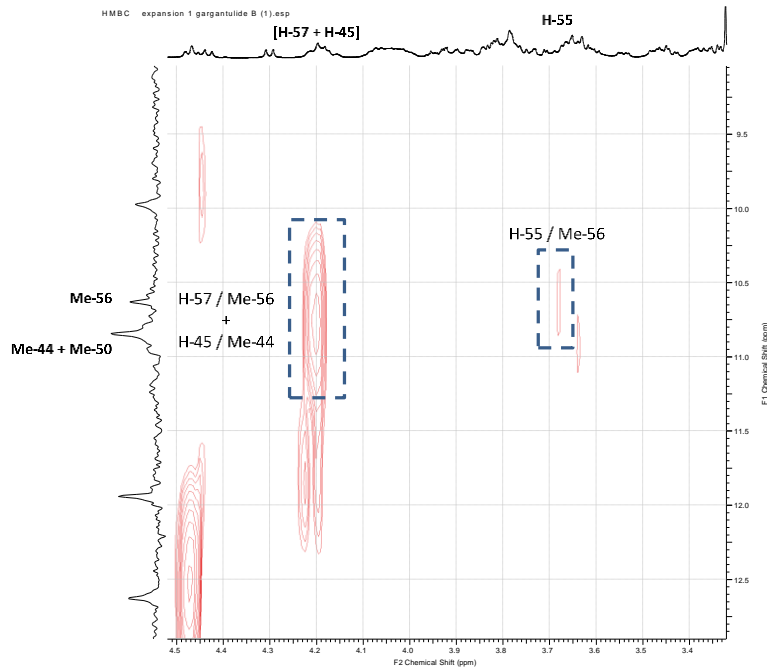

c) NOESY (left) and HMBC (right) expansion supporting the *anti/syn* configuration for C-55/C-56/C-57.

JRES gargantulae B (1).esp

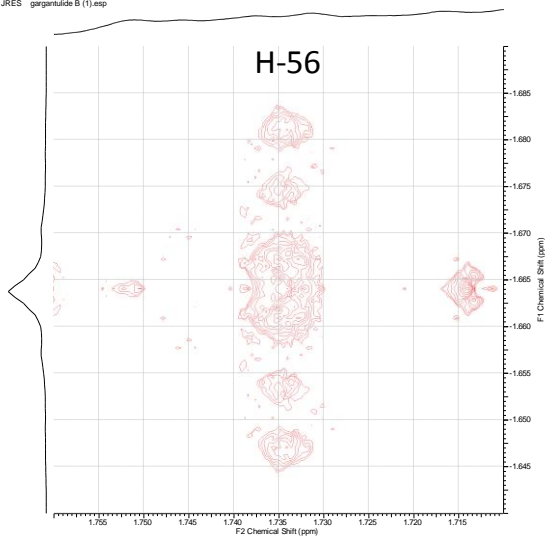

JRES gargantulae B (1).esp

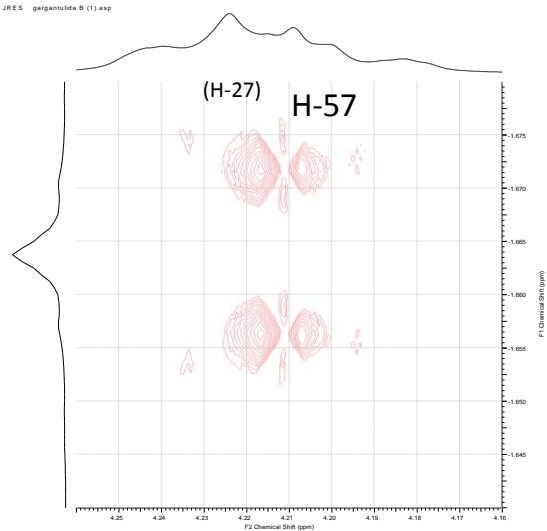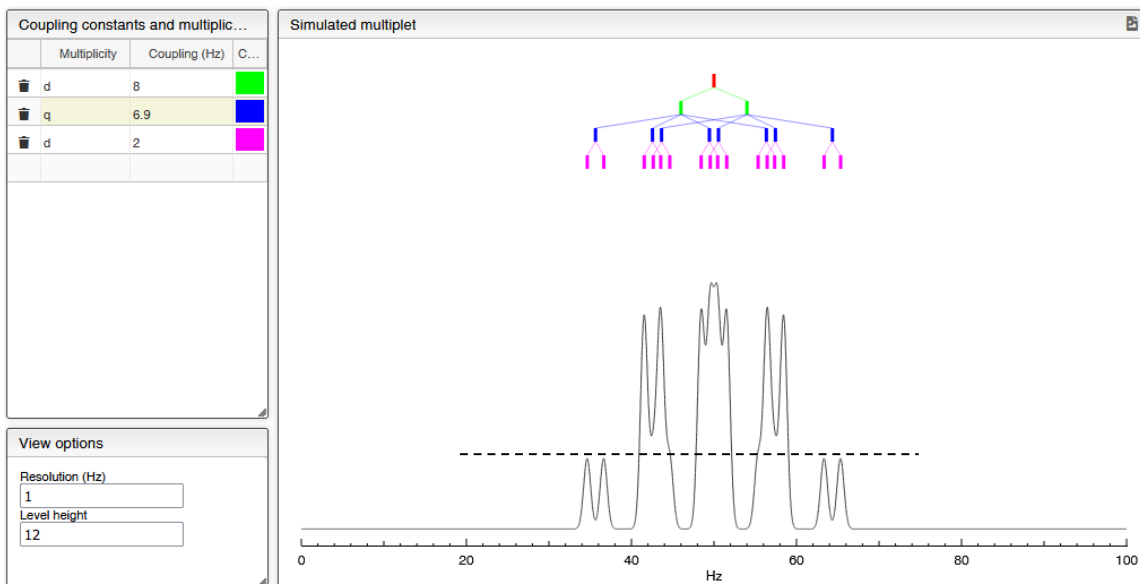

d) Expansions of the JRES spectrum of **1** showing the higher multiplicity of H-56 compared to that of H-57 (top). Multiplet simulation<sup>20</sup> for H-56 (applied values for  $^1\text{H}$ - $^1\text{H}$  coupling constants are indicated) showing good fitting with the multiplicity experimentally observed (bottom).

**Figure S12.** Determination of the relative configuration of the C-6–C-7 stereocluster for gargantulide B (**1**)

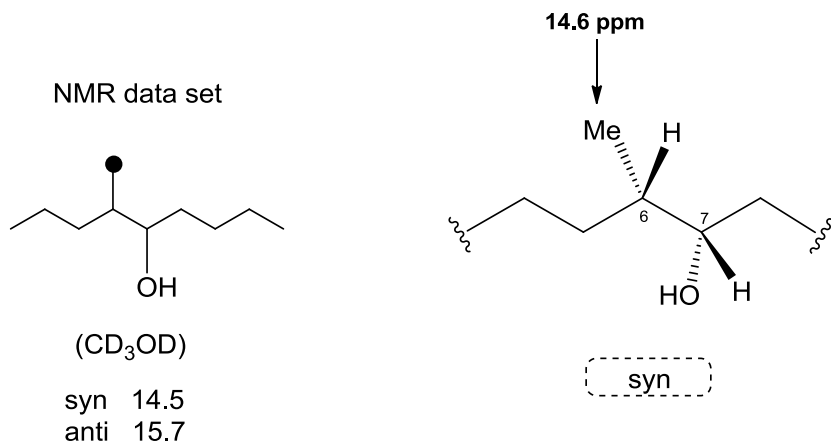

Application of Kishi's NMR data set for 4-methylnonan-5-ol isomers <sup>21</sup>.

**Figure S13.** Determination of the relative configuration of the C-10–C-12 stereocenter for gargantulide B (**1**)

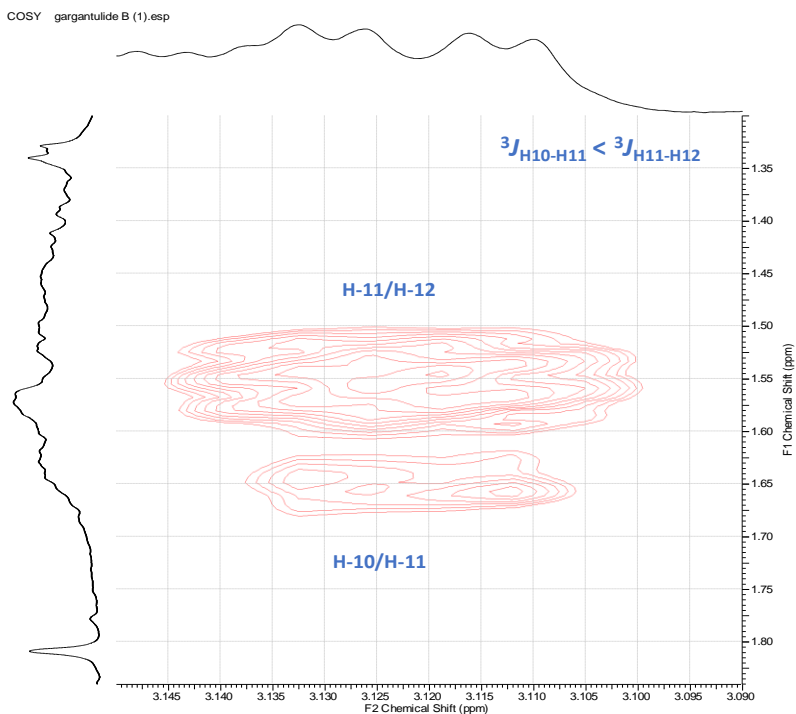

a) Key COSY correlations supporting the *syn/anti* configuration for C-10/C-11/C-12

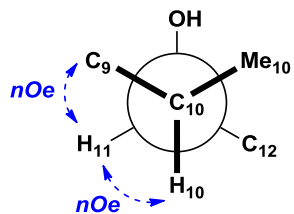

$$^3J_{H10-H11} = 3.2 \text{ Hz}$$

$$^3J_{Me10-H11} = \text{ca. large}$$

$$^3J_{C9-H11} = \text{ca. small}$$

$$^3J_{C12-H10} = \text{ca. small}$$

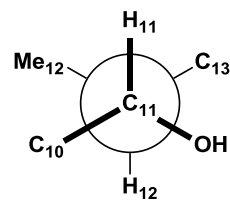

$$^3J_{H11-H12} = 8.2 \text{ Hz}$$

$$^3J_{Me12-H11} = \text{ca. small}$$

$$^3J_{C10-H12} = \text{ca. small}$$

$$^3J_{C13-H11} = \text{ca. small}$$

b) Qualitative  $^3J_{C,H}$ -based configuration analysis of the C-10 to C-12 stereocenter. Key NOESY correlations are also indicated (although critical overlapping of proton NMR signals corresponding to Me-10 and Me-12 make impossible to distinguish the key NOESY correlation H-10/Me-12 from the genuine cross-peak H-10/Me-10, the clear absence of NOESY correlations between H-10 and both H-13 further supports the configurational proposal)



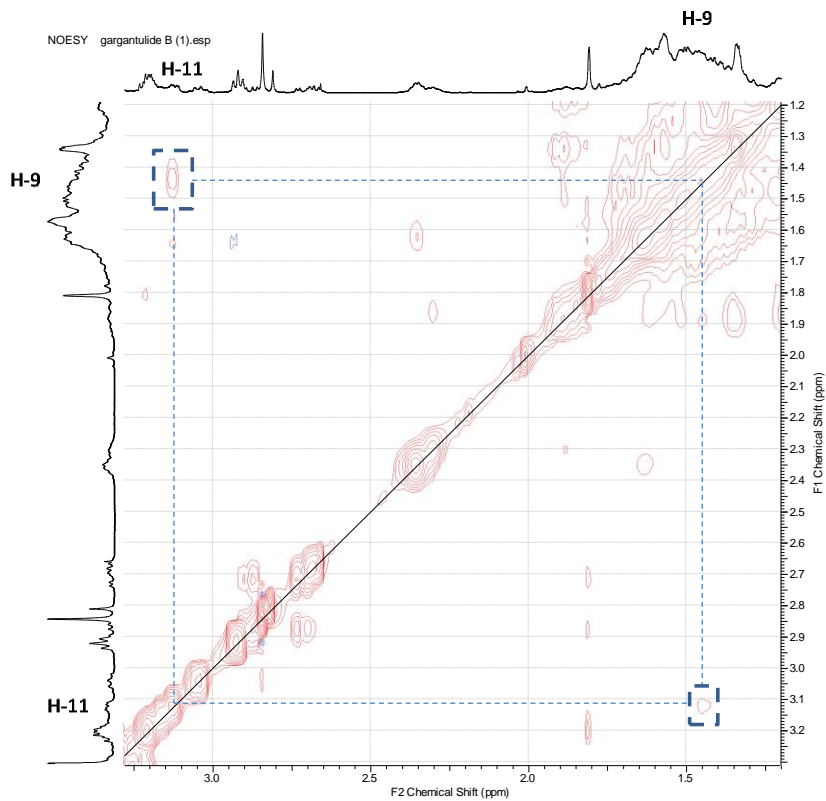

c) Key NOESY correlation supporting the *anti* configuration for C-10–C-12 stereocenter

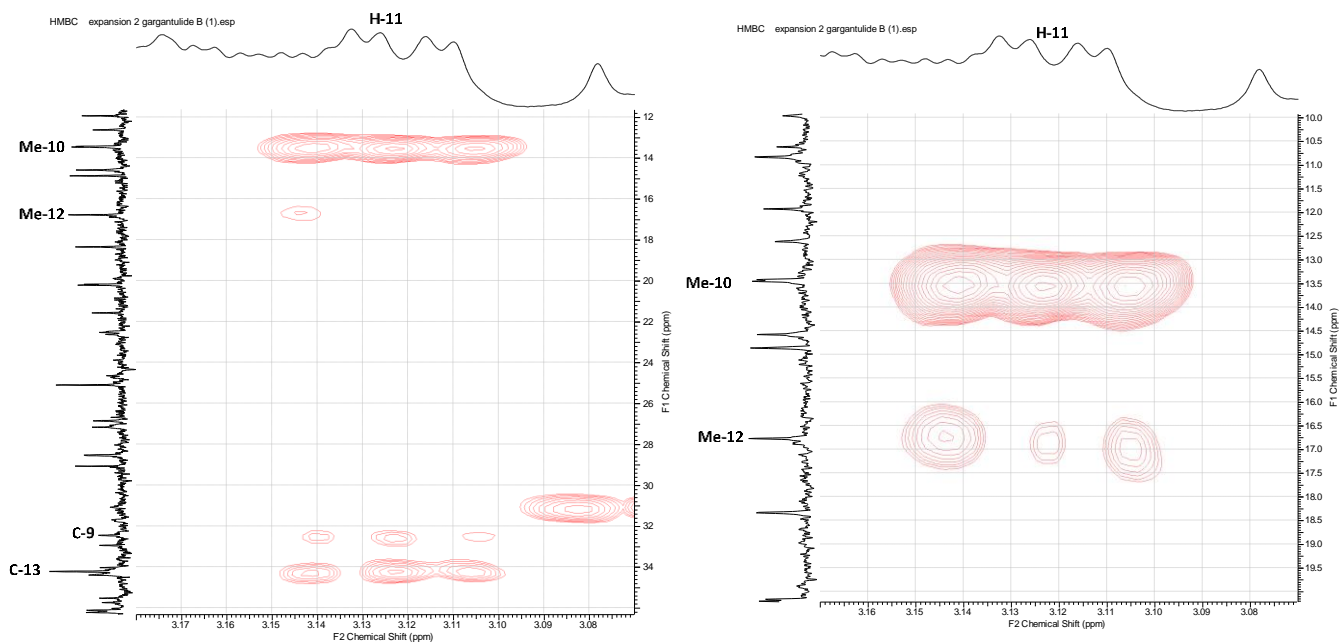

d) HMBC correlations supporting the *anti* configuration for C-10–C-12 stereocenter

**Figure S14.** Determination of the relative configuration of the C-17(R)–C-18(R) stereocluster for gargantulide B (**1**)

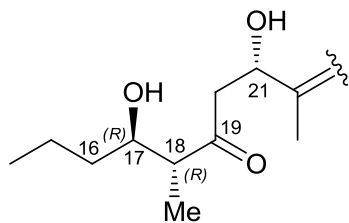

*anti* relative configuration

17(R), 18(R) abs. configuration

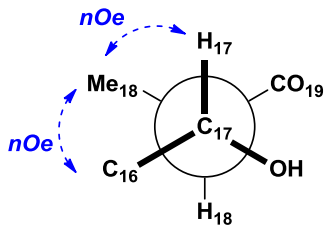

$${}^3J_{\text{H}17\text{-H}18} = 8.6 \text{ Hz}$$

$${}^3J_{\text{Me}18\text{-H}17} = \text{ca. small}$$

$${}^3J_{\text{C}16\text{-H}18} = \text{ca. small}$$

$${}^3J_{\text{C}19\text{-H}17} = \text{ca. small}$$

a) Qualitative  ${}^3J_{\text{C,H}}$ -based configuration analysis of the C-17–C-18 stereocluster

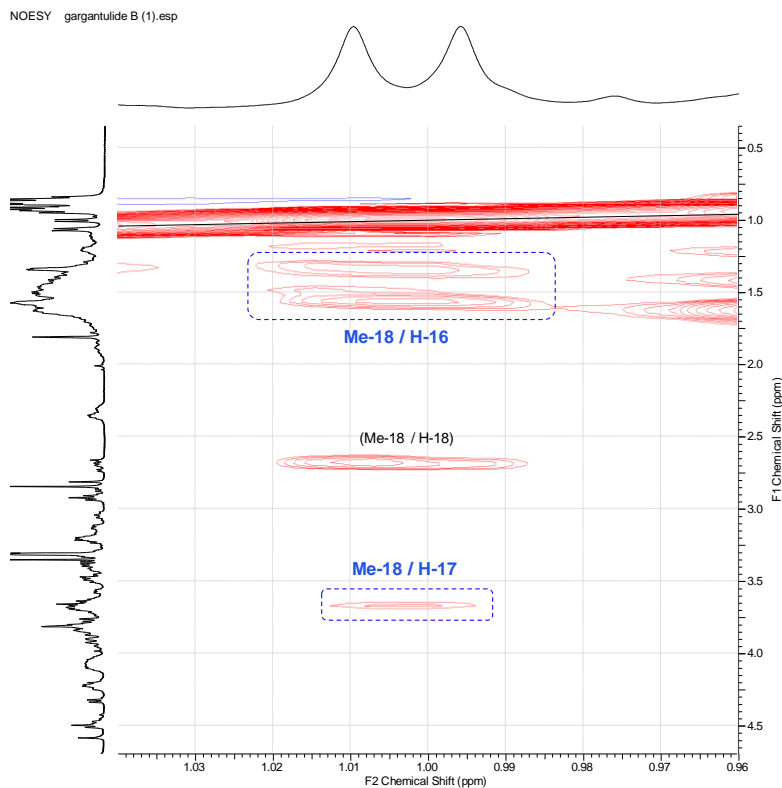

b) Key NOESY correlations supporting the anti configuration for C-17–C-18 stereocluster

**Figure S15.** Determination of the absolute configuration of the non-amino sugars present in gargantulides B (**1**) and C (**2**)

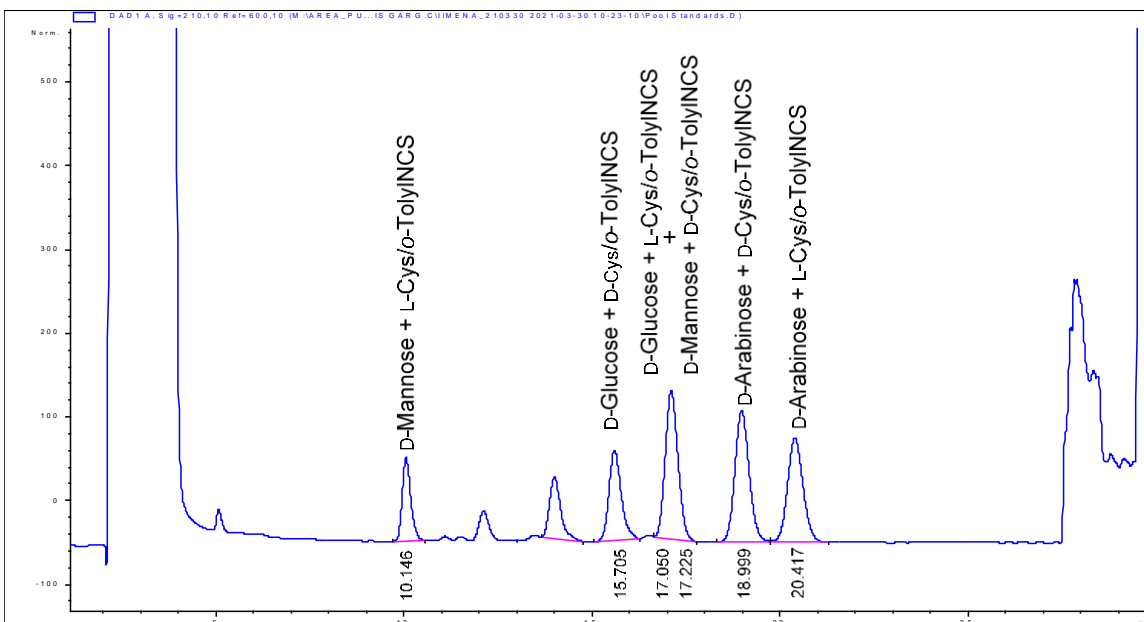

a) LC-UV chromatogram of a mixture of both L- and D-cysteine methyl ester hydrochloride / *o*-tolyl isothiocyanate derivatization reactions of D-Mannose / D-Glucose / D-arabinose standard monosaccharides.

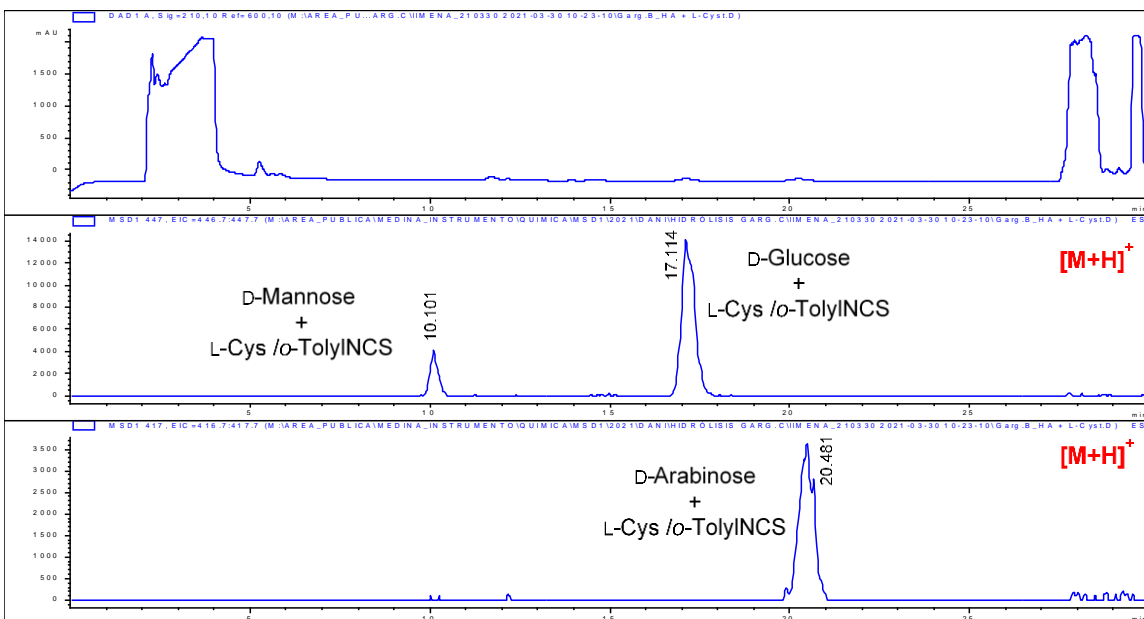

b) LC-UV and extracted-ion chromatograms (EIC) of L-cysteine methyl ester hydrochloride / *o*-tolyl isothiocyanate derivatized hydrolysate of **1** with HCl. D-Mannose, D-Glucose and D-Arabinose were found in **1**

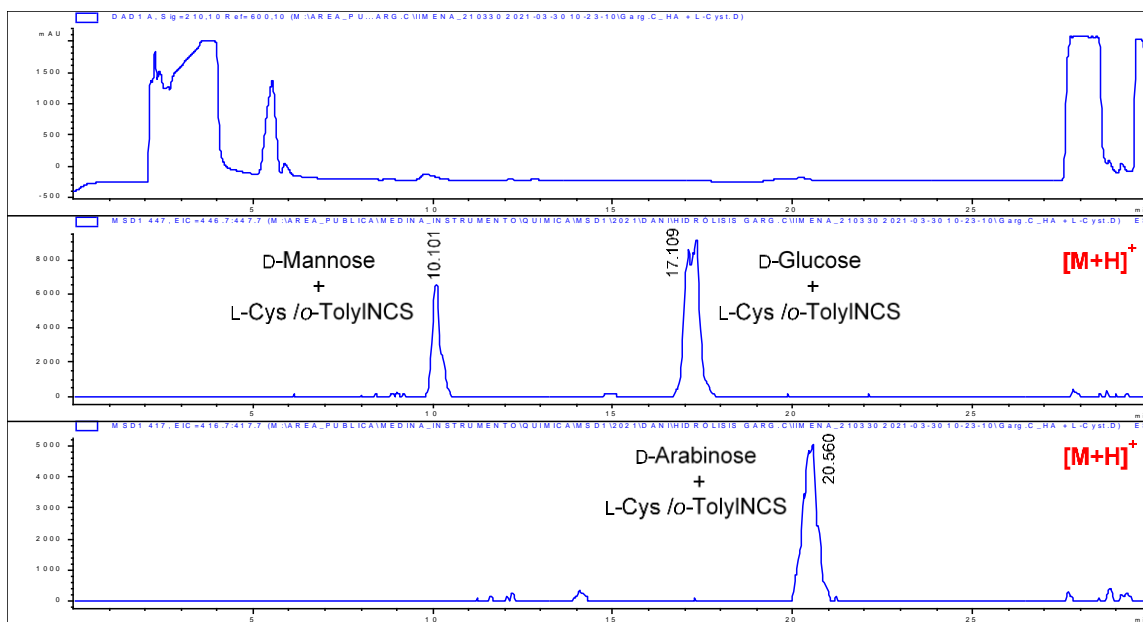

c) LC-UV and extracted-ion chromatograms (EIC) of L-cysteine methyl ester hydrochloride / *o*-tolyl isothiocyanate derivatized hydrolysate of **2** with HCl. D-Mannose, D-Glucose and D-Arabinose were found in **2**

**Table S9.** Antibacterial and antifungal activities of compounds **1** and **2**.

| Microbial strain     | Strain number | MIC ( $\mu\text{g/mL}$ ) |       |     |          |    |      |
|----------------------|---------------|--------------------------|-------|-----|----------|----|------|
|                      |               | (1)                      | (2)   | R   | A        | Am | V    |
| <i>A. baumannii</i>  | MB5973        | 16-32                    | 16-32 | 2-4 |          |    |      |
| <i>P. aeruginosa</i> | MB5919        | >128                     | >128  |     | 1        |    |      |
| <i>E. coli</i>       | ATCC 25922    | >128                     | >128  |     | 0.5-0.25 |    |      |
| <i>K. pneumoniae</i> | ATCC 700603   | >128                     | >128  |     | >16      |    |      |
| MRSA                 |               | 4-8                      | 2-4   |     |          |    | 2-4  |
| MSSA                 |               | 2-4                      | 2-4   |     |          |    | 1    |
| VRE                  |               | 2-4                      | 1-2   |     |          |    | >128 |
| <i>A. fumigatus</i>  | ATCC46645     | 32-64                    | 32-64 |     |          | 4  |      |
| <i>C. albicans</i>   | ATCC64124     | >128                     | >128  |     |          | 4  |      |

\*Positive controls: R Rifampicin, A Aztreonam, Am Amphotericin B, V Vancomycin

## Supplementary references

- 1 I. Pérez-Victoria, J. Martín and F. Reyes, Combined LC/UV/MS and NMR Strategies for the Dereplication of Marine Natural Products, *Planta Med.*, 2016, **82**, 857–871.
- 2 <https://www.geneious.com>, <https://www.geneious.com>.
- 3 A. T. Keatinge-Clay, A Tylosin Ketoreductase Reveals How Chirality Is Determined in Polyketides, *Chem. Biol.*, 2007, **14**, 898–908.
- 4 A. Keatinge-Clay, Crystal Structure of the Erythromycin Polyketide Synthase Dehydratase, *J. Mol. Biol.*, 2008, **384**, 941–953.
- 5 D. H. Kwan and F. Schulz, The stereochemistry of complex polyketide biosynthesis by modular polyketide synthases, *Molecules*, 2011, **16**, 6092–6115.
- 6 E. M. Musiol-Kroll and W. Wohlleben, Acyltransferases as tools for polyketide synthase engineering, *Antibiotics*, , DOI:10.3390/antibiotics7030062.
- 7 R. C. Edgar, MUSCLE: A multiple sequence alignment method with reduced time and space complexity, *BMC Bioinformatics*, 2004, **5**, 1–19.
- 8 M. C. Monteiro, M. De La Cruz, J. Cantizani, C. Moreno, J. R. Tormo, E. Mellado, J. R. De Lucas, F. Asensio, V. Valiante, A. A. Brakhage, J. P. Latgé, O. Genilloud and F. Vicente, A new approach to drug discovery: High-throughput screening of microbial natural extracts against *Aspergillus fumigatus* using resazurin, *J. Biomol. Screen.*, 2012, **17**, 542–549.
- 9 J. Martín, T. S. Da Sousa, G. Crespo, S. Palomo, I. González, J. R. Tormo, M. De La Cruz, M. Anderson, R. T. Hill, F. Vicente, O. Genilloud and F. Reyes, Kocurin, the true structure of PM181104, an anti-methicillin-resistant *Staphylococcus aureus* (MRSA) thiazolyl peptide from the marine-derived bacterium *Kocuria palustris*, *Mar. Drugs*, 2013, **11**, 387–398.
- 10 L. Zhang, A. S. Ravipati, S. R. Koyyalamudi, S. C. Jeong, N. Reddy, J. Bartlett, P. T. Smith, M. de la Cruz, M. C. Monteiro, Á. Melguizo, E. Jiménez and F. Vicente, Anti-fungal and anti-bacterial activities of ethanol extracts of selected traditional Chinese medicinal herbs, *Asian Pac. J. Trop. Med.*, 2013, **6**, 673–681.
- 11 J. H. Zhang, T. D. Y. Chung and K. R. Oldenburg, A simple statistical parameter for use in evaluation and validation of high throughput screening assays, *J. Biomol. Screen.*, 1999, **4**, 67–73.
- 12 C. E. Melançon, L. Hong, J. A. White, Y. N. Liu and H. W. Liu, Characterization of TDP-4-keto-6-deoxy-D-glucose-3,4-ketoisomerase from the D-mycaminose biosynthetic pathway of *Streptomyces fradiae*: In vitro activity and substrate specificity studies, *Biochemistry*, 2007, **46**, 577–590.
- 13 M. Tello, M. Rejzek, B. Wilkinson, D. M. Lawson and R. A. Field, Tyl1a, a TDP-6-deoxy-D-xylo-4-hexulose 3, 4-isomerase from *Streptomyces fradiae*: Structure prediction, mutagenesis and solvent isotope incorporation experiments to investigate reaction mechanism, *ChemBioChem*, 2008, **9**, 1295–1302.
- 14 H. Chen, S. M. Yeung, N. L. S. Que, T. Müller, R. R. Schmidt and H. W. Liu, Expression, purification, and characterization of Ty1B, an aminotransferase involved in the biosynthesis of mycaminose [9], *J. Am. Chem. Soc.*, 1999, **121**, 7166–7167.
- 15 H. Chen, H. Yamase, K. Murakami, C. wei Chang, L. Zhao, Z. Zhao and H. wen Liu, Expression, purification, and characterization of two N,N-dimethyltransferases, Ty1M1 and DesVI, involved in the biosynthesis of mycaminose and desosamine, *Biochemistry*, 2002, **41**, 9165–9183.
- 16 L. Hong, Z. Zhao, C. E. Melançon, H. Zhang and H. W. Liu, In vitro characterization of the enzymes involved in TDP-D-forosamine biosynthesis in the spinosyn pathway of *Saccharopolyspora spinosa*, *J. Am. Chem. Soc.*, 2008, **130**, 4954–4967.
- 17 J. R. Rho, G. Subramaniam, H. Choi, E. H. Kim, S. P. Ng, K. Yoganathan, S. Ng, A. D. Buss, M. S. Butler and W. H. Gerwick, Gargantulide A, a complex 52-membered macrolactone showing antibacterial activity from *streptomyces* sp., *Org. Lett.*, 2015, **17**, 1377–1380.
- 18 Y. Kobayashi, C.-H. Tan and Y. Kishi, Toward Creation of a Universal NMR Database for Stereochemical Assignment: Complete Structure of the Desertomycin/Oasomycin Class of Natural Products, *J. Am. Chem. Soc.*, 2001, **123**, 2076–2078.
- 19 N. Matsumori, D. Kaneno, M. Murata, H. Nakamura and K. Tachibana, Stereochemical

- Determination of Acyclic Structures Based on Carbon–Proton Spin-Coupling Constants. A Method of Configuration Analysis for Natural Products, *J. Org. Chem.*, 1999, **64**, 866–876.
- 20 [http://www.cheminfo.org/Spectra/NMR/Tools/Multiplet\\_simulator/index.html](http://www.cheminfo.org/Spectra/NMR/Tools/Multiplet_simulator/index.html), .
- 21 K. Takada, Y. Imae, Y. Ise, S. Ohtsuka, A. Ito, S. Okada, M. Yoshida and S. Matsunaga, Yakushinamides, Polyoxygenated Fatty Acid Amides That Inhibit HDACs and SIRT6, from the Marine Sponge *Theonella swinhoei*, *J. Nat. Prod.*, 2016, **79**, 2384–2390.
